# Supplementary material for: Study protocol: the OxWell school survey investigating social, emotional and behavioural factors associated with mental health and well-being
Source: HighWire-hosted journal article supplement (doi:10.1136/bmjopen-2021-052717), 2021-11-01
Supplement: bmjopen-2021-052717supp002_data_supplement.pdf [file bmjopen-2021-052717supp002_data_supplement.pdf]

# OxWell VARIABLE GUIDE 2021

## Questionnaire: Primary (Years 4-7)

For the most up-to-date versions, please see <https://osf.io/sekhr/>

### Contents

#### Variable Guide Table of Contents

|                                     |    |
|-------------------------------------|----|
| <b>DEMOGRAPHICS</b> .....           | 2  |
| <b>DIET AND FOOD POVERTY</b> .....  | 3  |
| <b>SLEEP</b> .....                  | 4  |
| <b>EXERCISE</b> .....               | 7  |
| <b>SCHOOL EXPERIENCE</b> .....      | 10 |
| <b>SAFETY</b> .....                 | 14 |
| <b>INTERNET</b> .....               | 15 |
| <b>COVID</b> .....                  | 16 |
| <b>BULLYING</b> .....               | 17 |
| <b>MENTAL HEALTH</b> .....          | 19 |
| <b>MENTAL HEALTH SERVICES</b> ..... | 23 |
| <b>RELATIONSHIPS</b> .....          | 24 |
| <b>RESEARCH</b> .....               | 25 |

OxWell 2012 Primary  
**DEMOGRAPHICS**

| CODE | Contingent | Question                                         | Label                                                                                                                                                                                                                                                                                                                                                                                       | Value                                                                                        | Type    | Matched            | Year Included        |
|------|------------|--------------------------------------------------|---------------------------------------------------------------------------------------------------------------------------------------------------------------------------------------------------------------------------------------------------------------------------------------------------------------------------------------------------------------------------------------------|----------------------------------------------------------------------------------------------|---------|--------------------|----------------------|
|      |            | <b>Please enter your Year Group</b>              | <i>Year group</i>                                                                                                                                                                                                                                                                                                                                                                           | 4 - 6                                                                                        | Numeric | Prim; Sec;<br>FE   | 2019, 2020,<br>2021  |
|      |            | <b>Are you a boy or a girl?</b>                  | <i>Girl</i><br><i>Boy</i><br><i>Prefer not to answer</i>                                                                                                                                                                                                                                                                                                                                    | F<br>M<br>R                                                                                  | String  | Prim;<br>Sec*; FE* | 2019, 2020,<br>2021* |
|      |            | <b>How old are you</b>                           | <i>Age in full years</i>                                                                                                                                                                                                                                                                                                                                                                    | 8 - 12                                                                                       | Numeric | Prim; Sec;<br>FE   | 2019, 2020,<br>2021  |
|      |            | <b>Who do you live with?</b>                     | <i>I live with both of my parents</i><br><i>I live with one of my parents</i><br><i>My parents are separated and I live in two homes</i><br><i>I live with other relatives or adoptive parents</i><br><i>I live with other people (foster carers, foster home, childrens home)</i><br><i>I live in more than one place</i><br><i>I live somewhere else</i><br><i>I would rather not say</i> | PARENTS<br>PARENT<br>SEPARATED<br>PARENT<br>RELATIVE<br>OTHERHOM<br>E<br>MANY<br>OTHER<br>RF | String  | Prim; Sec;<br>FE   | 2019*;<br>2020;2021  |
|      |            | <b>Is your home rented?</b>                      | <i>Yes</i><br><i>No</i><br><i>Don't know</i>                                                                                                                                                                                                                                                                                                                                                | Y<br>N<br>R                                                                                  | String  | Prim; Sec;<br>FE   | 2021                 |
|      |            | <b>Were you born in the UK</b>                   | <i>Yes</i><br><i>No</i><br><i>Would rather not say</i>                                                                                                                                                                                                                                                                                                                                      | Y<br>N<br>R                                                                                  | String  | Prim; Sec;<br>FE   | 2019*;2020;<br>2021  |
|      |            | <b>Were both of your parents born in the UK?</b> | <i>Yes</i><br><i>No</i><br><i>Would rather not say</i>                                                                                                                                                                                                                                                                                                                                      | Y<br>N<br>R                                                                                  | String  | Prim; Sec;<br>FE   | 2019*;2020;<br>2021  |

Note: A \* in the Matched or Year Included columns indicates that the Question or Label column contain differences in the \* indicated year or survey version

OxWell 2012 Primary

**DIET AND FOOD POVERTY**

| CODE | Contingent | Question                                                                                                                                   | Label                | Value     | Type          | Matched          | Year Included       |
|------|------------|--------------------------------------------------------------------------------------------------------------------------------------------|----------------------|-----------|---------------|------------------|---------------------|
|      |            | <b><i>Do you usually eat breakfast?</i></b>                                                                                                | <i>Never</i>         | 0-12.5    | Sliding scale | Prim; Sec;<br>FE | 2019; 2020;<br>2021 |
|      |            |                                                                                                                                            | <i>Not often</i>     | 12.6-37.5 |               |                  |                     |
|      |            |                                                                                                                                            | <i>Sometimes</i>     | 37.6-62.4 |               |                  |                     |
|      |            |                                                                                                                                            | <i>Usually</i>       | 62.5-87.4 |               |                  |                     |
|      |            |                                                                                                                                            | <i>Every morning</i> | 87.5-100  |               |                  |                     |
|      |            | <b><i>Some young people go to school or to bed hungry because there is not enough food at home. How often does this happen to you?</i></b> | <i>Not at all</i>    | 0-12.5    | Sliding scale | Prim; Sec;<br>FE | 2019; 2020;<br>2021 |
|      |            |                                                                                                                                            | <i>Once or twice</i> | 12.6-37.5 |               |                  |                     |
|      |            |                                                                                                                                            | <i>Sometimes</i>     | 37.6-62.4 |               |                  |                     |
|      |            |                                                                                                                                            | <i>Most days</i>     | 62.5-87.4 |               |                  |                     |
|      |            |                                                                                                                                            | <i>Every day</i>     | 87.5-100  |               |                  |                     |

Note: A \* in the *Matched* or *Year Included* columns indicates that the *Question* or *Label* column contain differences in the \* indicated year or survey version

## OxWell 2012 Primary

**SLEEP**

| CODE | Contingent | Question                                                              | Label                                                                                                      | Value                                                     | Type          | Matched       | Year Included |
|------|------------|-----------------------------------------------------------------------|------------------------------------------------------------------------------------------------------------|-----------------------------------------------------------|---------------|---------------|---------------|
|      |            | <b>What time (to the nearest hour) did you go to bed last night?</b>  | <i>Time to bed (in hour)</i>                                                                               | 6pm – 2am or later                                        | String        | Prim; Sec; FE | 2019; 2020    |
|      |            | <b>How long do you usually take to fall asleep?</b>                   | 0 mins<br>30 mins (half an hour)<br>60 mins (1 hour)<br>90 mins (1.5 hours)<br>120+ mins (2 hours or more) | 0-12.5<br>12.6-37.5<br>37.6-62.4<br>62.5-87.4<br>87.5-100 | Sliding scale | Prim; Sec; FE | 2021          |
|      |            | <b>What time do you usually go to bed on a school night?</b>          | 6pm<br>8pm<br>10pm<br>12 midnight<br>2am or later                                                          | 0-12.5<br>12.6-37.5<br>37.6-62.4<br>62.5-87.4<br>87.5-100 | Sliding scale | Prim; Sec; FE | 2021          |
|      |            | <b>What time do you usually try to fall asleep on a school night?</b> | 6pm<br>8pm<br>10pm<br>12 midnight<br>2am or later                                                          | 0-12.5<br>12.6-37.5<br>37.6-62.4<br>62.5-87.4<br>87.5-100 | Sliding scale | Prim; Sec; FE | 2021          |
|      |            | <b>What time do you usually wake up on a school day?</b>              | 5am<br>7am<br>9am<br>11am<br>1pm or later                                                                  | 0-12.5<br>12.6-37.5<br>37.6-62.4<br>62.5-87.4<br>87.5-100 | Sliding scale | Prim; Sec; FE | 2021          |
|      |            | <b>What time do you usually go to bed at the weekend?</b>             | 6pm<br>8pm<br>10pm<br>12 midnight<br>2am or later                                                          | 0-12.5<br>12.6-37.5<br>37.6-62.4<br>62.5-87.4<br>87.5-100 | Sliding scale | Prim; Sec; FE | 2021          |
|      |            | <b>What time do you usually try to fall asleep at the weekend?</b>    | 6pm<br>8pm<br>10pm<br>12 midnight<br>2am or later                                                          | 0-12.5<br>12.6-37.5<br>37.6-62.4<br>62.5-87.4<br>87.5-100 | Sliding scale | Prim; Sec; FE | 2021          |

Note: A \* in the Matched or Year Included columns indicates that the Question or Label column contain differences in the \* indicated year or survey version

## OxWell 2012 Primary

|  |                                                                                                                                                                                                        |                                                                                                            |                                                           |               |                  |      |
|--|--------------------------------------------------------------------------------------------------------------------------------------------------------------------------------------------------------|------------------------------------------------------------------------------------------------------------|-----------------------------------------------------------|---------------|------------------|------|
|  | <b>What time do you usually wake up at the weekend?</b>                                                                                                                                                | 5am<br>7am<br>9am<br>11am<br>1pm or later                                                                  | 0-12.5<br>12.6-37.5<br>37.6-62.4<br>62.5-87.4<br>87.5-100 | Sliding scale | Prim; Sec;<br>FE | 2021 |
|  | <b>People sometimes feel sleepy during the daytime. During your daytime activities, how much of a problem do you have with sleepiness (feeling sleepy, struggling to stay awake)?</b>                  | No problem at all<br>A little problem<br>More than a little problem<br>A big problem<br>A very big problem | 0-12.5<br>12.6-37.5<br>37.6-62.4<br>62.5-87.4<br>87.5-100 | Sliding scale | Prim; Sec;<br>FE | 2021 |
|  | <b>Thinking about the past month, to what extent has poor sleep troubled you in general?</b>                                                                                                           | Not at all<br>A little<br>Somewhat<br>Much<br>Very much                                                    | NOTATALL<br>LITTLE<br>SOMEWHAT<br>MUCH<br>VERYMUCH        | String        | Prim; Sec;<br>FE | 2021 |
|  | <b>Thinking about a typical night in the last month, how many nights a week do you have a problem with your sleep?</b>                                                                                 | 0-1<br>2<br>3<br>4<br>5-7                                                                                  | 0TO1<br>2<br>3<br>4<br>5TO7                               | String        | Prim; Sec;<br>FE | 2021 |
|  | <b>On a school night (when you have lessons the next day), who usually sets your bedtime?</b>                                                                                                          | Yourself<br>Parent/carer/guardian/<br>other family member<br>other                                         | SELF<br>CARER<br>##<br>OTHER                              | String        | Prim; Sec;<br>FE | 2021 |
|  | <b>On a weekend night (no lessons the next day), who usually sets your bedtime?</b>                                                                                                                    | Yourself<br>Parent/carer/guardian/<br>other family member<br>other                                         | SELF<br>CARER<br>##<br>OTHER                              | String        | Prim; Sec;<br>FE | 2021 |
|  | <b>On school nights (when you have lessons the next day), do you have a rule or set time in your house about when you are supposed to turn off or put away computers, phones or other electronics?</b> | Yes<br>No                                                                                                  | Y<br>N                                                    | String        | Prim; Sec;<br>FE | 2021 |
|  | <b>How often do you use social media (e.g. tik-tok, instagram) in the hour before you intend to go to sleep?</b>                                                                                       | Never<br>Rarely (1-2 times a month)                                                                        | 0-12.5<br>12.6-37.5                                       | Sliding scale | Prim; Sec;<br>FE | 2021 |

Note: A \* in the Matched or Year Included columns indicates that the Question or Label column contain differences in the \* indicated year or survey version

## OxWell 2012 Primary

|  |                                                                                                                                                                                             |                                     |           |               |            |      |
|--|---------------------------------------------------------------------------------------------------------------------------------------------------------------------------------------------|-------------------------------------|-----------|---------------|------------|------|
|  |                                                                                                                                                                                             | <i>Sometimes (1-2 times a week)</i> | 37.6-62.4 |               |            |      |
|  |                                                                                                                                                                                             | <i>Often (3-4 times a week)</i>     | 62.5-87.4 |               |            |      |
|  |                                                                                                                                                                                             | <i>Daily</i>                        | 87.5-100  |               |            |      |
|  | <b><i>How often do you play video games in the hour before you intend to go to sleep (including games on consoles, computer, tablet, mobile phone or other portable gaming device)?</i></b> | <i>Never</i>                        | 0-12.5    | Sliding scale | Prim; Sec; | 2021 |
|  |                                                                                                                                                                                             | <i>Rarely (1-2 times a month)</i>   | 12.6-37.5 |               | FE         |      |
|  |                                                                                                                                                                                             | <i>Sometimes (1-2 times a week)</i> | 37.6-62.4 |               |            |      |
|  |                                                                                                                                                                                             | <i>Often (3-4 times a week)</i>     | 62.5-87.4 |               |            |      |
|  |                                                                                                                                                                                             | <i>Daily</i>                        | 87.5-100  |               |            |      |

Note: A \* in the *Matched* or *Year Included* columns indicates that the *Question* or *Label* column contain differences in the \* indicated year or survey version

## OxWell 2012 Primary

**EXERCISE**

| CODE | Contingent | Question                                                                                                                       | Label                   | Value     | Type          | Matched          | Year Included |
|------|------------|--------------------------------------------------------------------------------------------------------------------------------|-------------------------|-----------|---------------|------------------|---------------|
|      |            | <b>About how many hours physical activity or exercise do you do over a whole week (in and out of school, during term-time)</b> | <i>1 hour or less)</i>  | 0-12.5    | Sliding scale | Prim; Sec;<br>FE | 2020; 2021*   |
|      |            |                                                                                                                                | <i>3 hours</i>          | 12.6-37.5 |               |                  |               |
|      |            |                                                                                                                                | <i>6 hours</i>          | 37.6-62.4 |               |                  |               |
|      |            |                                                                                                                                | <i>9 hours</i>          | 62.5-87.4 |               |                  |               |
|      |            |                                                                                                                                | <i>12 hours or more</i> | 87.5-100  |               |                  |               |
|      |            | <b>How many times per week do you normally do PE/sports during school time?</b>                                                | <i>0</i>                | 0-12.5    | Sliding scale | Prim; Sec;<br>FE | 2021          |
|      |            |                                                                                                                                | <i>3</i>                | 12.6-37.5 |               |                  |               |
|      |            |                                                                                                                                | <i>6</i>                | 37.6-62.4 |               |                  |               |
|      |            |                                                                                                                                | <i>9</i>                | 62.5-87.4 |               |                  |               |
|      |            |                                                                                                                                | <i>12 or more</i>       | 87.5-100  |               |                  |               |
|      |            | <b>How many times per week do you do sports or exercise outside of school hours?</b>                                           | <i>0</i>                | 0-12.5    | Sliding scale | Prim; Sec;<br>FE | 2021          |
|      |            |                                                                                                                                | <i>3</i>                | 12.6-37.5 |               |                  |               |
|      |            |                                                                                                                                | <i>6</i>                | 37.6-62.4 |               |                  |               |
|      |            |                                                                                                                                | <i>9</i>                | 62.5-87.4 |               |                  |               |
|      |            |                                                                                                                                | <i>12 or more</i>       | 87.5-100  |               |                  |               |
|      |            | <b>Is most of your exercise at school or outside of school?</b>                                                                | <i>Only at</i>          | 0-12.5    | Sliding scale | Prim; Sec;<br>FE | 2021          |
|      |            |                                                                                                                                | <i>Mostly at</i>        | 12.6-37.5 |               |                  |               |
|      |            |                                                                                                                                | <i>Same in/out of</i>   | 37.6-62.4 |               |                  |               |
|      |            |                                                                                                                                | <i>Mostly outside</i>   | 62.5-87.4 |               |                  |               |
|      |            |                                                                                                                                | <i>All outside</i>      | 87.5-100  |               |                  |               |
|      |            | <b>Compared to before the first lockdown, how much time do you spend doing sports or exercise now?</b>                         | <i>Much less</i>        | 0-12.5    | Sliding scale | Prim; Sec;<br>FE | 2021          |
|      |            |                                                                                                                                | <i>Slightly less</i>    | 12.6-37.5 |               |                  |               |
|      |            |                                                                                                                                | <i>The same amount</i>  | 37.6-62.4 |               |                  |               |
|      |            |                                                                                                                                | <i>Slightly more</i>    | 62.5-87.4 |               |                  |               |
|      |            |                                                                                                                                | <i>Much more</i>        | 87.5-100  |               |                  |               |
|      |            | <b>How much do you enjoy physical exercise outside of school time?</b>                                                         | <i>Never</i>            | 0-12.5    | Sliding scale | Prim; Sec;<br>FE | 2021          |
|      |            |                                                                                                                                | <i>Not often</i>        | 12.6-37.5 |               |                  |               |
|      |            |                                                                                                                                | <i>Sometimes</i>        | 37.6-62.4 |               |                  |               |
|      |            |                                                                                                                                | <i>Quite often</i>      | 62.5-87.4 |               |                  |               |
|      |            |                                                                                                                                | <i>Always</i>           | 87.5-100  |               |                  |               |
|      |            | <b>Would you like to do more sports/exercise?</b>                                                                              | <i>Yes</i>              | Y         | String        | Prim; Sec;<br>FE | 2020; 2021    |
|      |            |                                                                                                                                | <i>No</i>               | N         |               |                  |               |

Note: A \* in the Matched or Year Included columns indicates that the Question or Label column contain differences in the \* indicated year or survey version

## OxWell 2012 Primary

|  |                                                                                           |                      |           |               |               |                  |
|--|-------------------------------------------------------------------------------------------|----------------------|-----------|---------------|---------------|------------------|
|  | <b>How much do you normally enjoy your PE lessons?</b>                                    | Never                | 0-12.5    | String        | Prim; Sec; FE | 2020; 2021       |
|  |                                                                                           | Not often            | 12.6-37.5 |               |               |                  |
|  |                                                                                           | Sometimes            | 37.6-62.4 |               |               |                  |
|  |                                                                                           | Quite often          | 62.5-87.4 |               |               |                  |
|  |                                                                                           | Always               | 87.5-100  |               |               |                  |
|  | <b>How important are the following in your decision to do sport or physical activity:</b> |                      |           |               |               |                  |
|  | <b>Spend time with friends and meet new people</b>                                        | Not at all important | 0-12.5    | Sliding scale | Prim; Sec; FE | 2019; 2021       |
|  |                                                                                           | Not very important   | 12.6-37.5 |               |               |                  |
|  |                                                                                           | Quite important      | 37.6-62.4 |               |               |                  |
|  |                                                                                           | Important            | 62.5-87.4 |               |               |                  |
|  |                                                                                           | Very important       | 87.5-100  |               |               |                  |
|  | <b>Exercise get fit</b>                                                                   | Not at all important | 0-12.5    | Sliding scale | Prim; Sec; FE | 2019; 2020; 2021 |
|  |                                                                                           | Not very important   | 12.6-37.5 |               |               |                  |
|  |                                                                                           | Quite important      | 37.6-62.4 |               |               |                  |
|  |                                                                                           | Important            | 62.5-87.4 |               |               |                  |
|  |                                                                                           | Very important       | 87.5-100  |               |               |                  |
|  | <b>Unwind/reduce stress</b>                                                               | Not at all important | 0-12.5    | Sliding scale | Prim; Sec; FE | 2019; 2020; 2021 |
|  |                                                                                           | Not very important   | 12.6-37.5 |               |               |                  |
|  |                                                                                           | Quite important      | 37.6-62.4 |               |               |                  |
|  |                                                                                           | Important            | 62.5-87.4 |               |               |                  |
|  |                                                                                           | Very important       | 87.5-100  |               |               |                  |
|  | <b>Weight management/body shaping</b>                                                     | Not at all important | 0-12.5    | Sliding scale | Prim; Sec; FE | 2019; 2020; 2021 |
|  |                                                                                           | Not very important   | 12.6-37.5 |               |               |                  |
|  |                                                                                           | Quite important      | 37.6-62.4 |               |               |                  |
|  |                                                                                           | Important            | 62.5-87.4 |               |               |                  |
|  |                                                                                           | Very important       | 87.5-100  |               |               |                  |
|  | <b>Learn a new skill</b>                                                                  | Not at all important | 0-12.5    | Sliding scale | Prim; Sec; FE | 2019; 2020; 2021 |
|  |                                                                                           | Not very important   | 12.6-37.5 |               |               |                  |
|  |                                                                                           | Quite important      | 37.6-62.4 |               |               |                  |
|  |                                                                                           | Important            | 62.5-87.4 |               |               |                  |
|  |                                                                                           | Very important       | 87.5-100  |               |               |                  |
|  | <b>Improve performance/do well competitively</b>                                          | Not at all important | 0-12.5    | Sliding scale | Prim; Sec; FE | 2019; 2020; 2021 |
|  |                                                                                           | Not very important   | 12.6-37.5 |               |               |                  |
|  |                                                                                           | Quite important      | 37.6-62.4 |               |               |                  |
|  |                                                                                           | Important            | 62.5-87.4 |               |               |                  |
|  |                                                                                           | Very important       | 87.5-100  |               |               |                  |
|  | <b>Enjoyment - feeling good physically/mentally</b>                                       | Not at all important | 0-12.5    | Sliding scale | Prim; Sec; FE | 2019; 2020; 2021 |
|  |                                                                                           | Not very important   | 12.6-37.5 |               |               |                  |
|  |                                                                                           | Quite important      | 37.6-62.4 |               |               |                  |
|  |                                                                                           | Important            | 62.5-87.4 |               |               |                  |

Note: A \* in the Matched or Year Included columns indicates that the Question or Label column contain differences in the \* indicated year or survey version

## OxWell 2012 Primary

|  |                                                                                    |                                                                            |                   |               |                  |                     |
|--|------------------------------------------------------------------------------------|----------------------------------------------------------------------------|-------------------|---------------|------------------|---------------------|
|  | <b><i>Have to do it for others - school/team/family</i></b>                        | <i>Very important</i>                                                      | 87.5-100          | Sliding scale | Prim; Sec;<br>FE | 2019; 2020;<br>2021 |
|  |                                                                                    | <i>Not at all important</i>                                                | 0-12.5            |               |                  |                     |
|  |                                                                                    | <i>Not very important</i>                                                  | 12.6-37.5         |               |                  |                     |
|  |                                                                                    | <i>Quite important</i>                                                     | 37.6-62.4         |               |                  |                     |
|  |                                                                                    | <i>Important</i>                                                           | 62.5-87.4         |               |                  |                     |
|  |                                                                                    | <i>Very important</i>                                                      | 87.5-100          |               |                  |                     |
|  | <b><i>How do you normally (i.e. for most of the journey) travel to school?</i></b> | <i>I travel by vehicle (e.g. bus, car, van, train, motorbike)</i>          | TRAVELVEH<br>ICLE | Sliding scale | Prim; Sec;<br>FE | 2019*; 2021         |
|  |                                                                                    | <i>I do not travel by vehicle (e.g. walk, cycle, skate, skoot, blades)</i> | TRAVELWAL<br>K    |               |                  |                     |

Note: A \* in the *Matched* or *Year Included* columns indicates that the *Question* or *Label* column contain differences in the \* indicated year or survey version

## OxWell 2012 Primary

**SCHOOL EXPERIENCE**

| CODE | Contingent | Question                                                                                                    | Label                             | Value     | Type          | Matched       | Year Included    |
|------|------------|-------------------------------------------------------------------------------------------------------------|-----------------------------------|-----------|---------------|---------------|------------------|
|      |            | <b>How much help and support with learning do you feel that you get at school?</b>                          | <i>No help at all</i>             | 0-12.5    | Sliding scale | Prim; Sec; FE | 2019; 2020; 2021 |
|      |            |                                                                                                             | <i>Not enough help</i>            | 12.6-37.5 |               |               |                  |
|      |            |                                                                                                             | <i>Just about enough help</i>     | 37.6-62.4 |               |               |                  |
|      |            |                                                                                                             | <i>Most of the help I need</i>    | 62.5-87.4 |               |               |                  |
|      |            |                                                                                                             | <i>All of the help I need</i>     | 87.5-100  |               |               |                  |
|      |            | <b>How much help and support do you feel you get with your homework from the people you live with?</b>      | <i>No help at all</i>             | 0-12.5    | Sliding scale | Prim; Sec; FE | 2019; 2020; 2021 |
|      |            |                                                                                                             | <i>Not enough help</i>            | 12.6-37.5 |               |               |                  |
|      |            |                                                                                                             | <i>Just about enough help</i>     | 37.6-62.4 |               |               |                  |
|      |            |                                                                                                             | <i>Most of the help I need</i>    | 62.5-87.4 |               |               |                  |
|      |            |                                                                                                             | <i>All of the help I need</i>     | 87.5-100  |               |               |                  |
|      |            | <b>How would you describe being at your school?</b>                                                         |                                   |           |               |               | 2019*; 2021      |
|      |            | <b>I enjoy my school</b>                                                                                    | <i>Strongly Disagree</i>          | 0-12.5    | Sliding scale | Prim; Sec; FE | 2019; 2021       |
|      |            |                                                                                                             | <i>Disagree</i>                   | 12.6-37.5 |               |               |                  |
|      |            |                                                                                                             | <i>Neither Agree nor disagree</i> | 37.6-62.4 |               |               |                  |
|      |            |                                                                                                             | <i>Agree</i>                      | 62.5-87.4 |               |               |                  |
|      |            |                                                                                                             | <i>Strongly Agree</i>             | 87.5-100  |               |               |                  |
|      |            | <b>I try my best at school</b>                                                                              | <i>Strongly Disagree</i>          | 0-12.5    | Sliding scale | Prim; Sec; FE | 2019; 2021       |
|      |            |                                                                                                             | <i>Disagree</i>                   | 12.6-37.5 |               |               |                  |
|      |            |                                                                                                             | <i>Neither Agree nor disagree</i> | 37.6-62.4 |               |               |                  |
|      |            |                                                                                                             | <i>Agree</i>                      | 62.5-87.4 |               |               |                  |
|      |            |                                                                                                             | <i>Strongly Agree</i>             | 87.5-100  |               |               |                  |
|      |            | <b>I learn a lot at school</b>                                                                              | <i>Strongly Disagree</i>          | 0-12.5    | Sliding scale | Prim; Sec; FE | 2019; 2021       |
|      |            |                                                                                                             | <i>Disagree</i>                   | 12.6-37.5 |               |               |                  |
|      |            |                                                                                                             | <i>Neither Agree nor disagree</i> | 37.6-62.4 |               |               |                  |
|      |            |                                                                                                             | <i>Agree</i>                      | 62.5-87.4 |               |               |                  |
|      |            |                                                                                                             | <i>Strongly Agree</i>             | 87.5-100  |               |               |                  |
|      |            | <b>My school is giving me useful skills and knowledge</b>                                                   | <i>Strongly Disagree</i>          | 0-12.5    | Sliding scale | Prim; Sec; FE | 2019; 2021       |
|      |            |                                                                                                             | <i>Disagree</i>                   | 12.6-37.5 |               |               |                  |
|      |            |                                                                                                             | <i>Neither Agree nor disagree</i> | 37.6-62.4 |               |               |                  |
|      |            |                                                                                                             | <i>Agree</i>                      | 62.5-87.4 |               |               |                  |
|      |            |                                                                                                             | <i>Strongly Agree</i>             | 87.5-100  |               |               |                  |
|      |            | <b>My school has lots of activities (like sport and drama) to take part in at lunchtime or after school</b> | <i>Strongly Disagree</i>          | 0-12.5    | Sliding scale | Prim; Sec; FE | 2019; 2021       |
|      |            |                                                                                                             | <i>Disagree</i>                   | 12.6-37.5 |               |               |                  |

Note: A \* in the Matched or Year Included columns indicates that the Question or Label column contain differences in the \* indicated year or survey version

## OxWell 2012 Primary

|                                                                 |                                   |           |               |                 |            |
|-----------------------------------------------------------------|-----------------------------------|-----------|---------------|-----------------|------------|
| <b><i>My teacher(s) make my lessons fun and interesting</i></b> | <i>Neither Agree nor disagree</i> | 37.6-62.4 | Sliding scale | Prim; Sec; FE*  | 2019; 2021 |
|                                                                 | <i>Agree</i>                      | 62.5-87.4 |               |                 |            |
|                                                                 | <i>Strongly Agree</i>             | 87.5-100  |               |                 |            |
|                                                                 | <i>Strongly Disagree</i>          | 0-12.5    |               |                 |            |
|                                                                 | <i>Disagree</i>                   | 12.6-37.5 |               |                 |            |
|                                                                 | <i>Neither Agree nor disagree</i> | 37.6-62.4 |               |                 |            |
| <b><i>My teacher(s) tell me how I am doing with my work</i></b> | <i>Agree</i>                      | 62.5-87.4 | Sliding scale | Prim; Sec; FE*  | 2019; 2021 |
|                                                                 | <i>Strongly Agree</i>             | 87.5-100  |               |                 |            |
|                                                                 | <i>Strongly Disagree</i>          | 0-12.5    |               |                 |            |
|                                                                 | <i>Disagree</i>                   | 12.6-37.5 |               |                 |            |
|                                                                 | <i>Neither Agree nor disagree</i> | 37.6-62.4 |               |                 |            |
|                                                                 | <i>Agree</i>                      | 62.5-87.4 |               |                 |            |
| <b><i>Other pupils often disrupt my lessons</i></b>             | <i>Strongly Agree</i>             | 87.5-100  | Sliding scale | Prim; Sec; FE   | 2019; 2021 |
|                                                                 | <i>Strongly Disagree</i>          | 0-12.5    |               |                 |            |
|                                                                 | <i>Disagree</i>                   | 12.6-37.5 |               |                 |            |
|                                                                 | <i>Neither Agree nor disagree</i> | 37.6-62.4 |               |                 |            |
|                                                                 | <i>Agree</i>                      | 62.5-87.4 |               |                 |            |
|                                                                 | <i>Strongly Agree</i>             | 87.5-100  |               |                 |            |
| <b><i>I get enough help at school with learning</i></b>         | <i>Strongly Disagree</i>          | 0-12.5    | Sliding scale | Prim; Sec; FE   | 2019; 2021 |
|                                                                 | <i>Disagree</i>                   | 12.6-37.5 |               |                 |            |
|                                                                 | <i>Neither Agree nor disagree</i> | 37.6-62.4 |               |                 |            |
|                                                                 | <i>Agree</i>                      | 62.5-87.4 |               |                 |            |
|                                                                 | <i>Strongly Agree</i>             | 87.5-100  |               |                 |            |
|                                                                 | <i>Strongly Disagree</i>          | 0-12.5    |               |                 |            |
| <b><i>I get enough help at school when I am upset</i></b>       | <i>Disagree</i>                   | 12.6-37.5 | Sliding scale | Prim; Sec*; FE* | 2019; 2021 |
|                                                                 | <i>Neither Agree nor disagree</i> | 37.6-62.4 |               |                 |            |
|                                                                 | <i>Agree</i>                      | 62.5-87.4 |               |                 |            |
|                                                                 | <i>Strongly Agree</i>             | 87.5-100  |               |                 |            |
|                                                                 | <i>Strongly Disagree</i>          | 0-12.5    |               |                 |            |
|                                                                 | <i>Disagree</i>                   | 12.6-37.5 |               |                 |            |
| <b><i>I feel stressed by school work</i></b>                    | <i>Neither Agree nor disagree</i> | 37.6-62.4 | Sliding scale | Prim; Sec; FE   | 2019; 2021 |
|                                                                 | <i>Agree</i>                      | 62.5-87.4 |               |                 |            |
|                                                                 | <i>Strongly Agree</i>             | 87.5-100  |               |                 |            |
|                                                                 | <i>Strongly Disagree</i>          | 0-12.5    |               |                 |            |
|                                                                 | <i>Disagree</i>                   | 12.6-37.5 |               |                 |            |
|                                                                 | <i>Neither Agree nor disagree</i> | 37.6-62.4 |               |                 |            |
| <b><i>I worry about going to school</i></b>                     | <i>Agree</i>                      | 62.5-87.4 | Sliding scale | Prim; Sec; FE   | 2019; 2021 |
|                                                                 | <i>Strongly Agree</i>             | 87.5-100  |               |                 |            |
|                                                                 | <i>Strongly Disagree</i>          | 0-12.5    |               |                 |            |
|                                                                 | <i>Disagree</i>                   | 12.6-37.5 |               |                 |            |
|                                                                 | <i>Neither Agree nor disagree</i> | 37.6-62.4 |               |                 |            |
|                                                                 | <i>Agree</i>                      | 62.5-87.4 |               |                 |            |

Note: A \* in the *Matched* or *Year Included* columns indicates that the *Question* or *Label* column contain differences in the \* indicated year or survey version

## OxWell 2012 Primary

|                                                                                                           |                                                                        |                                   |               |               |               |            |
|-----------------------------------------------------------------------------------------------------------|------------------------------------------------------------------------|-----------------------------------|---------------|---------------|---------------|------------|
|                                                                                                           | <b><i>I am often in trouble</i></b>                                    | <i>Strongly Agree</i>             | 87.5-100      | Sliding scale | Prim; Sec; FE | 2019; 2021 |
|                                                                                                           |                                                                        | <i>Strongly Disagree</i>          | 0-12.5        |               |               |            |
|                                                                                                           |                                                                        | <i>Disagree</i>                   | 12.6-37.5     |               |               |            |
|                                                                                                           |                                                                        | <i>Neither Agree nor disagree</i> | 37.6-62.4     |               |               |            |
|                                                                                                           |                                                                        | <i>Agree</i>                      | 62.5-87.4     |               |               |            |
|                                                                                                           | <b><i>I am often aggressive or violent</i></b>                         | <i>Strongly Agree</i>             | 87.5-100      | Sliding scale | Prim; Sec; FE | 2019; 2021 |
|                                                                                                           |                                                                        | <i>Strongly Disagree</i>          | 0-12.5        |               |               |            |
|                                                                                                           |                                                                        | <i>Disagree</i>                   | 12.6-37.5     |               |               |            |
|                                                                                                           |                                                                        | <i>Neither Agree nor disagree</i> | 37.6-62.4     |               |               |            |
|                                                                                                           |                                                                        | <i>Agree</i>                      | 62.5-87.4     |               |               |            |
|                                                                                                           | <b><i>I usually achieve top marks at my school</i></b>                 | <i>Strongly Agree</i>             | 87.5-100      | Sliding scale | Prim; Sec; FE | 2019; 2021 |
|                                                                                                           |                                                                        | <i>Strongly Disagree</i>          | 0-12.5        |               |               |            |
|                                                                                                           |                                                                        | <i>Disagree</i>                   | 12.6-37.5     |               |               |            |
|                                                                                                           |                                                                        | <i>Neither Agree nor disagree</i> | 37.6-62.4     |               |               |            |
|                                                                                                           |                                                                        | <i>Agree</i>                      | 62.5-87.4     |               |               |            |
|                                                                                                           | <b><i>I am happy to use the school toilets</i></b>                     | <i>Strongly Agree</i>             | 87.5-100      | Sliding scale | Prim; Sec; FE | 2019; 2021 |
| <i>Strongly Disagree</i>                                                                                  |                                                                        | 0-12.5                            |               |               |               |            |
| <i>Disagree</i>                                                                                           |                                                                        | 12.6-37.5                         |               |               |               |            |
| <i>Neither Agree nor disagree</i>                                                                         |                                                                        | 37.6-62.4                         |               |               |               |            |
| <i>Agree</i>                                                                                              |                                                                        | 62.5-87.4                         |               |               |               |            |
| <b><i>How much do you think the school council and pupils views make a difference at your school?</i></b> | <i>Not at all</i>                                                      | 0-12.5                            | Sliding scale | Prim; Sec     | 2019; 2021    |            |
|                                                                                                           | <i>Not very</i>                                                        | 12.6-37.5                         |               |               |               |            |
|                                                                                                           | <i>Neither/Don't Know</i>                                              | 37.6-62.4                         |               |               |               |            |
|                                                                                                           | <i>Quite a lot</i>                                                     | 62.5-87.4                         |               |               |               |            |
|                                                                                                           | <i>Very much</i>                                                       | 87.5-100                          |               |               |               |            |
|                                                                                                           | <b><i>About speaking out:</i></b>                                      |                                   |               | String        | Prim; Sec; FE | 2021       |
|                                                                                                           | <b><i>Adults in my school ask for my opinion on things</i></b>         | <i>Never/Rarely</i>               | NEVER         |               |               |            |
|                                                                                                           |                                                                        | <i>Sometimes</i>                  | SOMETIMES     |               |               |            |
|                                                                                                           |                                                                        | <i>Often</i>                      | OFTEN         |               |               |            |
|                                                                                                           | <b><i>Adults in my school listen when I share my opinion</i></b>       | <i>Never/Rarely</i>               | NEVER         |               |               |            |
|                                                                                                           |                                                                        | <i>Sometimes</i>                  | SOMETIMES     |               |               |            |
|                                                                                                           |                                                                        | <i>Often</i>                      | OFTEN         |               |               |            |
|                                                                                                           | <b><i>My school friends ask my advice when they have a problem</i></b> | <i>Never/Rarely</i>               | NEVER         |               |               |            |
|                                                                                                           |                                                                        | <i>Sometimes</i>                  | SOMETIMES     |               |               |            |
|                                                                                                           |                                                                        | <i>Often</i>                      | OFTEN         |               |               |            |

Note: A \* in the *Matched* or *Year Included* columns indicates that the *Question* or *Label* column contain differences in the \* indicated year or survey version

## OxWell 2012 Primary

|  |                                                                                                       |                                   |              |        |               |      |
|--|-------------------------------------------------------------------------------------------------------|-----------------------------------|--------------|--------|---------------|------|
|  | <b><i>If I see something wrong in school I feel I can tell someone and they will listen</i></b>       | <i>Never/Rarely</i>               | NEVER        |        |               |      |
|  |                                                                                                       | <i>Sometimes</i>                  | SOMETIMES    |        |               |      |
|  |                                                                                                       | <i>Often</i>                      | OFTEN        |        |               |      |
|  | <b><i>I can speak up in class when I have a comment or question</i></b>                               | <i>Never/Rarely</i>               | NEVER        |        |               |      |
|  |                                                                                                       | <i>Sometimes</i>                  | SOMETIMES    |        |               |      |
|  |                                                                                                       | <i>Often</i>                      | OFTEN        |        |               |      |
|  | <b><i>I can speak up when I see someone else being hurt</i></b>                                       | <i>Never/Rarely</i>               | NEVER        |        |               |      |
|  |                                                                                                       | <i>Sometimes</i>                  | SOMETIMES    |        |               |      |
|  |                                                                                                       | <i>Often</i>                      | OFTEN        |        |               |      |
|  | <b><i>I can ask adults in my school for help when I need it</i></b>                                   | <i>Never/Rarely</i>               | NEVER        |        |               |      |
|  |                                                                                                       | <i>Sometimes</i>                  | SOMETIMES    |        |               |      |
|  |                                                                                                       | <i>Often</i>                      | OFTEN        |        |               |      |
|  | <b><i>How much do you agree with the following statement: I identify with my school community</i></b> | <i>Fully disagree</i>             | FULLDISAGREE | String | Prim; Sec; FE | 2021 |
|  |                                                                                                       | <i>Disagree</i>                   | DISAGREE     |        |               |      |
|  |                                                                                                       | <i>Somewhat disagree</i>          | SOMEDISAGREE |        |               |      |
|  |                                                                                                       | <i>Neither agree nor disagree</i> | NEITHER      |        |               |      |
|  |                                                                                                       | <i>Somewhat agree</i>             | SOMEAGREE    |        |               |      |
|  |                                                                                                       | <i>Agree</i>                      | AGREE        |        |               |      |
|  |                                                                                                       | <i>Fully agree</i>                | FULLAGREE    |        |               |      |

Note: A \* in the *Matched* or *Year Included* columns indicates that the *Question* or *Label* column contain differences in the \* indicated year or survey version

## OxWell 2012 Primary

**SAFETY**

| CODE | Contingent | Question                                                                      | Label                          | Value     | Type          | Matched          | Year Included       |
|------|------------|-------------------------------------------------------------------------------|--------------------------------|-----------|---------------|------------------|---------------------|
|      |            | <b><i>When you are at school, how safe do you feel?</i></b>                   | <i>Very unsafe</i>             | 0-12.5    | Sliding scale | Prim; Sec;<br>FE | 2019; 2020;<br>2021 |
|      |            |                                                                               | <i>Unsafe</i>                  | 12.6-37.5 |               |                  |                     |
|      |            |                                                                               | <i>Neither safe nor unsafe</i> | 37.6-62.4 |               |                  |                     |
|      |            |                                                                               | <i>Safe</i>                    | 62.5-87.4 |               |                  |                     |
|      |            |                                                                               | <i>Very safe</i>               | 87.5-100  |               |                  |                     |
|      |            | <b><i>How safe do you feel at home or the place where you live?</i></b>       | <i>Very unsafe</i>             | 0-12.5    | Sliding scale | Prim; Sec;<br>FE | 2019; 2020;<br>2021 |
|      |            |                                                                               | <i>Unsafe</i>                  | 12.6-37.5 |               |                  |                     |
|      |            |                                                                               | <i>Neither safe nor unsafe</i> | 37.6-62.4 |               |                  |                     |
|      |            |                                                                               | <i>Safe</i>                    | 62.5-87.4 |               |                  |                     |
|      |            |                                                                               | <i>Very safe</i>               | 87.5-100  |               |                  |                     |
|      |            | <b><i>How safe do you feel when crossing roads or walking near roads?</i></b> | <i>Very unsafe</i>             | 0-12.5    | Sliding scale | Prim             | 2019; 2021          |
|      |            |                                                                               | <i>Unsafe</i>                  | 12.6-37.5 |               |                  |                     |
|      |            |                                                                               | <i>Neither safe nor unsafe</i> | 37.6-62.4 |               |                  |                     |
|      |            |                                                                               | <i>Safe</i>                    | 62.5-87.4 |               |                  |                     |
|      |            |                                                                               | <i>Very safe</i>               | 87.5-100  |               |                  |                     |
|      |            | <b><i>How safe do you feel riding your bike on the roads?</i></b>             | <i>Very unsafe</i>             | 0-12.5    | Sliding scale | Prim             | 2019; 2021          |
|      |            |                                                                               | <i>Unsafe</i>                  | 12.6-37.5 |               |                  |                     |
|      |            |                                                                               | <i>Neither safe nor unsafe</i> | 37.6-62.4 |               |                  |                     |
|      |            |                                                                               | <i>Safe</i>                    | 62.5-87.4 |               |                  |                     |
|      |            |                                                                               | <i>Very safe</i>               | 87.5-100  |               |                  |                     |

Note: A \* in the *Matched* or *Year Included* columns indicates that the *Question* or *Label* column contain differences in the \* indicated year or survey version

## OxWell 2012 Primary

**INTERNET**

| CODE | Contingent | Question                                                                                                                                                   | Label                                                                                                                                | Value                                                      | Type          | Matched   | Year Included |
|------|------------|------------------------------------------------------------------------------------------------------------------------------------------------------------|--------------------------------------------------------------------------------------------------------------------------------------|------------------------------------------------------------|---------------|-----------|---------------|
|      |            | <b>Does an adult usually check what you are doing on the internet?</b>                                                                                     | Yes<br>No                                                                                                                            | Y<br>N                                                     | String        | Prim      | 2019; 2021    |
|      |            | <b>Approximately how much time did you spend last night online/playing computer games on your computer, laptop, tablet, mobile phone or games station?</b> | Under 1 hour<br>2 hours<br>4 hours<br>6 hours<br>More than 8 hours                                                                   | 0-12.5<br>12.6-37.5<br>37.6-62.4<br>62.5-87.4<br>87.5-100  | Sliding scale | Prim      | 2019; 2021    |
|      |            | <b>Do you argue with or feel criticised by friends, parents or carers about the amount of time you spend online?</b>                                       | Never<br>Not often<br>Sometimes<br>Quite often<br>Always                                                                             | 0-12.5<br>12.6-37.5<br>37.6-62.4<br>62.5-87.4<br>62.5-87.4 | Sliding scale | Prim      | 2019; 2021    |
|      |            | <b>Have you ever met a person in the real world that you got to know first online?</b>                                                                     | Yes<br>No                                                                                                                            | Y<br>N                                                     | String        | Prim; Sec | 2019; 2021    |
|      |            | <b>What was the age of the person that you met?</b>                                                                                                        | About the same age<br>Younger<br>Older<br>An adult<br>Would rather not say                                                           | SAME<br>YOUNGER<br>OLDER<br>ADULT<br>R                     | String        | Prim, Sec | 2019; 2021    |
|      |            | <b>Did you take someone with you when you met up with them?</b>                                                                                            | I went on my own<br>I went with a parent/carer<br>I went with another adult<br>I went with my brother/sister<br>I went with a friend | OWN<br>PARCAR<br>ADULT<br>SIBLING<br>FRIEND                | String        | Prim, Sec | 2019; 2021    |

Note: A \* in the Matched or Year Included columns indicates that the Question or Label column contain differences in the \* indicated year or survey version

OxWell 2012 Primary  
COVID

| CODE | Contingent | Question                                                                                     | Label                                                                                                                                                                                                                                     | Value                                                                                                | Type          | Matched          | Year Included |
|------|------------|----------------------------------------------------------------------------------------------|-------------------------------------------------------------------------------------------------------------------------------------------------------------------------------------------------------------------------------------------|------------------------------------------------------------------------------------------------------|---------------|------------------|---------------|
|      |            | <b>Do you think you have had Covid?</b>                                                      | No<br>Possibly<br>Probably<br>Yes (confirmed by test)                                                                                                                                                                                     | N<br>POSSIBLY<br>PROBABLY<br>Y                                                                       | String        | Prim; Sec;<br>FE | 2021          |
|      |            | <b>Compared to before the first lockdown, how easy have you found it to remember things?</b> | Very difficult<br>Quite difficult<br>The same<br>Quite easy<br>Very easy                                                                                                                                                                  | 0-12.5<br>12.6-37.5<br>37.6-62.4<br>62.5-87.4<br>87.5-100                                            | Sliding scale | Prim; Sec;<br>FE | 2021          |
|      |            | <b>Compared to before the first lockdown, how easy have you found it to concentrate?</b>     | Very difficult<br>Quite difficult<br>The same<br>Quite easy<br>Very easy                                                                                                                                                                  | 0-12.5<br>12.6-37.5<br>37.6-62.4<br>62.5-87.4<br>87.5-100                                            | Sliding scale | Prim; Sec;<br>FE | 2021          |
|      |            | <b>Compared to before the first lockdown, how easy have you found it to think clearly?</b>   | Very difficult<br>Quite difficult<br>The same<br>Quite easy<br>Very easy                                                                                                                                                                  | 0-12.5<br>12.6-37.5<br>37.6-62.4<br>62.5-87.4<br>87.5-100                                            | Sliding scale | Prim; Sec;<br>FE | 2021          |
|      |            | <b>Would you take a COVID-19 vaccine (approved for use in the UK) if offered?</b>            | Eager to get a COVID-19 vaccine<br>Willing to get a COVID-19 vaccine<br>Not bothered about getting a COVID-19 vaccine<br>Unwilling to get a COVID-19 vaccine<br>Anti-vaccination for COVID-19<br>Don't know<br>Don't know what this means | EAGER<br>WILLING<br>NOTBOTHE<br>RED<br>UNWILLING<br>ANTIVACCINATION<br>DONTKNOW<br>NOTUNDER<br>STAND | String        | Prim; Sec;<br>FE | 2021          |

Note: A \* in the Matched or Year Included columns indicates that the Question or Label column contain differences in the \* indicated year or survey version

## OxWell 2012 Primary

**BULLYING**

| CODE | Contingent | Question                                                                    | Label                                                                  | Value     | Type          | Matched           | Year Included           |
|------|------------|-----------------------------------------------------------------------------|------------------------------------------------------------------------|-----------|---------------|-------------------|-------------------------|
|      |            | <b>How well do you think your school deals with bullying</b>                | <i>Very badly</i>                                                      | 0-12.5    | Sliding scale | Prim; Sec;<br>FE  | 2019; 2021              |
|      |            |                                                                             | <i>Not very well</i>                                                   | 12.6-37.5 |               |                   |                         |
|      |            |                                                                             | <i>Average</i>                                                         | 37.6-62.4 |               |                   |                         |
|      |            |                                                                             | <i>Quite well</i>                                                      | 62.5-87.4 |               |                   |                         |
|      |            |                                                                             | <i>Extremely well</i>                                                  | 87.5-100  |               |                   |                         |
|      |            | <b>Have you been bullied in the last year?</b>                              | <i>No</i>                                                              | 0-12.5    | Sliding scale | Prim*;<br>Sec; FE | 2019*;<br>2020;<br>2021 |
|      |            |                                                                             | <i>Not often (e.g. once or twice)</i>                                  | 12.6-37.5 |               |                   |                         |
|      |            |                                                                             | <i>Sometimes (e.g. monthly)</i>                                        | 37.6-62.4 |               |                   |                         |
|      |            |                                                                             | <i>Quite often (e.g. weekly)</i>                                       | 62.5-87.4 |               |                   |                         |
|      |            |                                                                             | <i>Most days</i>                                                       | 87.5-100  |               |                   |                         |
|      |            | <b>Is the bullying still happening?</b>                                     | Yes                                                                    | Y         | String        | Prim; Sec;<br>FE  | 2019; 2021              |
|      |            |                                                                             | No                                                                     | N         |               |                   |                         |
|      |            |                                                                             | Would rather not say                                                   | R         |               |                   |                         |
|      |            | <b>If you have been bullied in the last year in what way did it happen?</b> | Physical                                                               | Y         | Tick box      | Prim; Sec;<br>FE  | 2019*;<br>2020;<br>2021 |
|      |            |                                                                             | Verbal                                                                 | Y         |               |                   |                         |
|      |            |                                                                             | Cyber                                                                  | Y         |               |                   |                         |
|      |            |                                                                             | Isolated or Excluded                                                   | Y         |               |                   |                         |
|      |            |                                                                             | Other                                                                  | Y         |               |                   |                         |
|      |            | <b>If you have ever been bullied, did someone help you deal with it?</b>    | Parent, step-parent or carer                                           | Y         | Tick box      | Prim; Sec;<br>FE  | 2019; 2021*             |
|      |            |                                                                             | Someone else in your family                                            | Y         |               |                   |                         |
|      |            |                                                                             | Friend(s)                                                              | Y         |               |                   |                         |
|      |            |                                                                             | A teacher or other adult at your school                                | Y         |               |                   |                         |
|      |            |                                                                             | A mental health worker (from outside the school) who visits the school | Y         |               |                   |                         |
|      |            |                                                                             | A doctor, nurse (outside school), psychologist                         | Y         |               |                   |                         |
|      |            |                                                                             | A counsellor, youth worker or social worker                            | Y         |               |                   |                         |
|      |            |                                                                             | Internet advice sites, forums, chatrooms etc                           | Y         |               |                   |                         |
|      |            |                                                                             | No-one                                                                 | Y         |               |                   |                         |

Note: A \* in the *Matched* or *Year Included* columns indicates that the *Question* or *Label* column contain differences in the \* indicated year or survey version

## OxWell 2012 Primary

|  |                                                                            |                                                                                                                                                                                  |                                                                                                                       |          |                  |             |
|--|----------------------------------------------------------------------------|----------------------------------------------------------------------------------------------------------------------------------------------------------------------------------|-----------------------------------------------------------------------------------------------------------------------|----------|------------------|-------------|
|  | <b>Where does the bullying usually happen?</b>                             | The journey to/from school<br>Online/social media sites<br><br>During lessons<br>In school but outside of lessons<br>At home<br>The place you are living now<br>Outside<br>Other | TOFROMSCH<br>HOOL<br>INTERNET<br><br>CLASSROOM<br>M<br>OTHERSCHOOL<br>OL<br>HOME<br>PLACEMENT<br><br>OUTSIDE<br>OTHER | String   | Prim; Sec;<br>FE | 2019; 2021* |
|  | <b>What do pupils in your school do if they see someone being bullied?</b> | Try to stop the bullying<br>Tell a teacher<br>Laugh<br>Join in<br>Nothing                                                                                                        | Y<br>Y<br>Y<br>Y<br>Y                                                                                                 | Tick box |                  | 2021        |

Note: A \* in the *Matched* or *Year Included* columns indicates that the *Question* or *Label* column contain differences in the \* indicated year or survey version

OxWell 2012 Primary  
**MENTAL HEALTH**

| CODE | Contingent | Question                                                                                             | Label                   | Value     | Type          | Matched           | Year Included       |
|------|------------|------------------------------------------------------------------------------------------------------|-------------------------|-----------|---------------|-------------------|---------------------|
|      |            | <b><i>I've been feeling optimistic about the future (optimistic means hopeful and confident)</i></b> | <i>None of the time</i> | 0-12.5    | Sliding scale | Prim*;<br>Sec; FE | 2019; 2020;<br>2021 |
|      |            |                                                                                                      | <i>Rarely</i>           | 12.6-37.5 |               |                   |                     |
|      |            |                                                                                                      | <i>Some of the time</i> | 37.6-62.4 |               |                   |                     |
|      |            |                                                                                                      | <i>Often</i>            | 62.5-87.4 |               |                   |                     |
|      |            |                                                                                                      | <i>All of the time</i>  | 87.5-100  |               |                   |                     |
|      |            | <b><i>I've been feeling useful</i></b>                                                               | <i>None of the time</i> | 0-12.5    | Sliding scale | Prim; Sec;<br>FE  | 2019; 2020;<br>2021 |
|      |            |                                                                                                      | <i>Rarely</i>           | 12.6-37.5 |               |                   |                     |
|      |            |                                                                                                      | <i>Some of the time</i> | 37.6-62.4 |               |                   |                     |
|      |            |                                                                                                      | <i>Often</i>            | 62.5-87.4 |               |                   |                     |
|      |            |                                                                                                      | <i>All of the time</i>  | 87.5-100  |               |                   |                     |
|      |            | <b><i>I've been feeling relaxed</i></b>                                                              | <i>None of the time</i> | 0-12.5    | Sliding scale | Prim; Sec;<br>FE  | 2019; 2020;<br>2021 |
|      |            |                                                                                                      | <i>Rarely</i>           | 12.6-37.5 |               |                   |                     |
|      |            |                                                                                                      | <i>Some of the time</i> | 37.6-62.4 |               |                   |                     |
|      |            |                                                                                                      | <i>Often</i>            | 62.5-87.4 |               |                   |                     |
|      |            |                                                                                                      | <i>All of the time</i>  | 87.5-100  |               |                   |                     |
|      |            | <b><i>I've been feeling interested in other people</i></b>                                           | <i>None of the time</i> | 0-12.5    | Sliding scale | Prim; Sec;<br>FE  | 2019; 2020;<br>2021 |
|      |            |                                                                                                      | <i>Rarely</i>           | 12.6-37.5 |               |                   |                     |
|      |            |                                                                                                      | <i>Some of the time</i> | 37.6-62.4 |               |                   |                     |
|      |            |                                                                                                      | <i>Often</i>            | 62.5-87.4 |               |                   |                     |
|      |            |                                                                                                      | <i>All of the time</i>  | 87.5-100  |               |                   |                     |
|      |            | <b><i>I've had energy to spare</i></b>                                                               | <i>None of the time</i> | 0-12.5    | Sliding scale | Prim; Sec;<br>FE  | 2019; 2020;<br>2021 |
|      |            |                                                                                                      | <i>Rarely</i>           | 12.6-37.5 |               |                   |                     |
|      |            |                                                                                                      | <i>Some of the time</i> | 37.6-62.4 |               |                   |                     |
|      |            |                                                                                                      | <i>Often</i>            | 62.5-87.4 |               |                   |                     |
|      |            |                                                                                                      | <i>All of the time</i>  | 87.5-100  |               |                   |                     |
|      |            | <b><i>I've been dealing with problems well</i></b>                                                   | <i>None of the time</i> | 0-12.5    | Sliding scale | Prim; Sec;<br>FE  | 2019; 2020;<br>2021 |
|      |            |                                                                                                      | <i>Rarely</i>           | 12.6-37.5 |               |                   |                     |
|      |            |                                                                                                      | <i>Some of the time</i> | 37.6-62.4 |               |                   |                     |
|      |            |                                                                                                      | <i>Often</i>            | 62.5-87.4 |               |                   |                     |
|      |            |                                                                                                      | <i>All of the time</i>  | 87.5-100  |               |                   |                     |
|      |            | <b><i>I've been thinking clearly</i></b>                                                             | <i>None of the time</i> | 0-12.5    | Sliding scale | Prim; Sec;<br>FE  | 2019; 2020;<br>2021 |
|      |            |                                                                                                      | <i>Rarely</i>           | 12.6-37.5 |               |                   |                     |
|      |            |                                                                                                      | <i>Some of the time</i> | 37.6-62.4 |               |                   |                     |

Note: A \* in the *Matched* or *Year Included* columns indicates that the *Question* or *Label* column contain differences in the \* indicated year or survey version

## OxWell 2012 Primary

|  |                                                                  |                         |           |               |                  |                     |
|--|------------------------------------------------------------------|-------------------------|-----------|---------------|------------------|---------------------|
|  |                                                                  | <i>Often</i>            | 62.5-87.4 |               |                  |                     |
|  |                                                                  | <i>All of the time</i>  | 87.5-100  |               |                  |                     |
|  | <b><i>I've been feeling good about myself</i></b>                | <i>None of the time</i> | 0-12.5    | Sliding scale | Prim; Sec;<br>FE | 2019; 2020;<br>2021 |
|  |                                                                  | <i>Rarely</i>           | 12.6-37.5 |               |                  |                     |
|  |                                                                  | <i>Some of the time</i> | 37.6-62.4 |               |                  |                     |
|  |                                                                  | <i>Often</i>            | 62.5-87.4 |               |                  |                     |
|  |                                                                  | <i>All of the time</i>  | 87.5-100  |               |                  |                     |
|  | <b><i>I've been feeling confident</i></b>                        | <i>None of the time</i> | 0-12.5    | Sliding scale | Prim; Sec;<br>FE | 2019; 2020;<br>2021 |
|  |                                                                  | <i>Rarely</i>           | 12.6-37.5 |               |                  |                     |
|  |                                                                  | <i>Some of the time</i> | 37.6-62.4 |               |                  |                     |
|  |                                                                  | <i>Often</i>            | 62.5-87.4 |               |                  |                     |
|  |                                                                  | <i>All of the time</i>  | 87.5-100  |               |                  |                     |
|  | <b><i>I've been able to make my own mind up about things</i></b> | <i>None of the time</i> | 0-12.5    | Sliding scale | Prim; Sec;<br>FE | 2019; 2020;<br>2021 |
|  |                                                                  | <i>Rarely</i>           | 12.6-37.5 |               |                  |                     |
|  |                                                                  | <i>Some of the time</i> | 37.6-62.4 |               |                  |                     |
|  |                                                                  | <i>Often</i>            | 62.5-87.4 |               |                  |                     |
|  |                                                                  | <i>All of the time</i>  | 87.5-100  |               |                  |                     |
|  | <b><i>I've been feeling loved</i></b>                            | <i>None of the time</i> | 0-12.5    | Sliding scale | Prim; Sec;<br>FE | 2019; 2020;<br>2021 |
|  |                                                                  | <i>Rarely</i>           | 12.6-37.5 |               |                  |                     |
|  |                                                                  | <i>Some of the time</i> | 37.6-62.4 |               |                  |                     |
|  |                                                                  | <i>Often</i>            | 62.5-87.4 |               |                  |                     |
|  |                                                                  | <i>All of the time</i>  | 87.5-100  |               |                  |                     |
|  | <b><i>I've been interested in new things</i></b>                 | <i>None of the time</i> | 0-12.5    | Sliding scale | Prim; Sec;<br>FE | 2019; 2020;<br>2021 |
|  |                                                                  | <i>Rarely</i>           | 12.6-37.5 |               |                  |                     |
|  |                                                                  | <i>Some of the time</i> | 37.6-62.4 |               |                  |                     |
|  |                                                                  | <i>Often</i>            | 62.5-87.4 |               |                  |                     |
|  |                                                                  | <i>All of the time</i>  | 87.5-100  |               |                  |                     |
|  | <b><i>I've been feeling cheerful</i></b>                         | <i>None of the time</i> | 0-12.5    | Sliding scale | Prim; Sec;<br>FE | 2019; 2020;<br>2021 |
|  |                                                                  | <i>Rarely</i>           | 12.6-37.5 |               |                  |                     |
|  |                                                                  | <i>Some of the time</i> | 37.6-62.4 |               |                  |                     |
|  |                                                                  | <i>Often</i>            | 62.5-87.4 |               |                  |                     |
|  |                                                                  | <i>All of the time</i>  | 87.5-100  |               |                  |                     |
|  | <b><i>I've been feeling close to other people</i></b>            | <i>None of the time</i> | 0-12.5    | Sliding scale | Prim; Sec;<br>FE | 2019; 2020;<br>2021 |
|  |                                                                  | <i>Rarely</i>           | 12.6-37.5 |               |                  |                     |
|  |                                                                  | <i>Some of the time</i> | 37.6-62.4 |               |                  |                     |

Note: A \* in the *Matched* or *Year Included* columns indicates that the *Question* or *Label* column contain differences in the \* indicated year or survey version

## OxWell 2012 Primary

|  |                                                                                                              |                                          |           |               |                 |                   |
|--|--------------------------------------------------------------------------------------------------------------|------------------------------------------|-----------|---------------|-----------------|-------------------|
|  |                                                                                                              | <i>Often</i>                             | 62.5-87.4 |               |                 |                   |
|  |                                                                                                              | <i>All of the time</i>                   | 87.5-100  |               |                 |                   |
|  | <b>Overall, are you basically satisfied with your life?</b>                                                  | <i>Unsatisfied most of the time</i>      | 0-12.5    | Sliding scale | Prim; Sec; FE   | 2019; 2020; 2021  |
|  |                                                                                                              | <i>Quite unsatisfied</i>                 | 12.6-37.5 |               |                 |                   |
|  |                                                                                                              | <i>Neither satisfied nor unsatisfied</i> | 37.6-62.4 |               |                 |                   |
|  |                                                                                                              | <i>Quite satisfied</i>                   | 62.5-87.4 |               |                 |                   |
|  |                                                                                                              | <i>Satisfied</i>                         | 87.5-100  |               |                 |                   |
|  | <b>How often have you been so worried about something you can not sleep at night?</b>                        | <i>Never</i>                             | 0-12.5    | Sliding scale | Prim; Sec; FE   | 2019; 2020; 2021  |
|  |                                                                                                              | <i>Once or twice</i>                     | 12.6-37.5 |               |                 |                   |
|  |                                                                                                              | <i>Sometimes</i>                         | 37.6-62.4 |               |                 |                   |
|  |                                                                                                              | <i>Most nights</i>                       | 62.5-87.4 |               |                 |                   |
|  |                                                                                                              | <i>Every night</i>                       | 87.5-100  |               |                 |                   |
|  | <b>Thinking about how happy you have felt over the past week, would you say you felt generally</b>           | <i>Unhappy most of the time</i>          | 0-12.5    | Sliding scale | Prim; Sec*; FE* | 2019; 2020; 2021* |
|  |                                                                                                              | <i>Quite unhappy</i>                     | 12.6-37.5 |               |                 |                   |
|  |                                                                                                              | <i>Neither happy nor unhappy</i>         | 37.6-62.4 |               |                 |                   |
|  |                                                                                                              | <i>Quite happy</i>                       | 62.5-87.4 |               |                 |                   |
|  |                                                                                                              | <i>Happy most of the time</i>            | 87.5-100  |               |                 |                   |
|  | <b>Thinking about how happy you have felt over the past week AT SCHOOL, would you say you felt generally</b> | <i>Unhappy most of the time</i>          | 0-12.5    | Sliding scale | Prim; Sec*; FE* | 2019; 2021*       |
|  |                                                                                                              | <i>Quite unhappy</i>                     | 12.6-37.5 |               |                 |                   |
|  |                                                                                                              | <i>Neither happy nor unhappy</i>         | 37.6-62.4 |               |                 |                   |
|  |                                                                                                              | <i>Quite happy</i>                       | 62.5-87.4 |               |                 |                   |
|  |                                                                                                              | <i>Happy most of the time</i>            | 87.5-100  |               |                 |                   |
|  | <b>Overall, how confident about your future do you generally feel?</b>                                       | Not at all confident                     | 0-12.5    | Sliding scale | Prim ; Sec; FE  | 2019;2021         |
|  |                                                                                                              | Not very confident                       | 12.6-37.5 |               |                 |                   |
|  |                                                                                                              | Quite confident                          | 37.6-62.4 |               |                 |                   |
|  |                                                                                                              | Confident                                | 62.5-87.4 |               |                 |                   |
|  |                                                                                                              | Extremely confident                      | 87.5-100  |               |                 |                   |
|  | <b>How proud do you feel of things you have achieved in your life?</b>                                       | Not at all                               | 0-12.5    | Sliding scale | Prim ; Sec; FE  | 2019; 2021        |
|  |                                                                                                              | Not very                                 | 12.6-37.5 |               |                 |                   |
|  |                                                                                                              | A bit                                    | 37.6-62.4 |               |                 |                   |
|  |                                                                                                              | Quite                                    | 62.5-87.4 |               |                 |                   |

Note: A \* in the Matched or Year Included columns indicates that the Question or Label column contain differences in the \* indicated year or survey version

OxWell 2012 Primary

Extremely

87.5-100

Note: A \* in the *Matched* or *Year Included* columns indicates that the *Question* or *Label* column contain differences in the \* indicated year or survey version

OxWell 2012 Primary

**MENTAL HEALTH SERVICES**

| CODE | Contingent                                                                                     | Question                                                                                                         | Label                   | Value  | Type          | Matched           | Year Included        |
|------|------------------------------------------------------------------------------------------------|------------------------------------------------------------------------------------------------------------------|-------------------------|--------|---------------|-------------------|----------------------|
|      |                                                                                                | <b>Do you know who helps children in your school when they feel upset and need help (mental health support)?</b> | Yes                     | Y      | String        | Prim*;<br>Sec; FE | 2019*; 2020;<br>2021 |
|      | No                                                                                             |                                                                                                                  | N                       |        |               |                   |                      |
|      | Not sure                                                                                       |                                                                                                                  | D                       |        |               |                   |                      |
|      |                                                                                                | <b>Is it easy for you to find someone when you feel upset and need help?</b>                                     | Very difficult          | 0-12.5 | Sliding scale | Prim*;<br>Sec; FE | 2020; 2021*          |
|      | Quite difficult                                                                                |                                                                                                                  | 12.6-37.5               |        |               |                   |                      |
|      | Sometimes difficult                                                                            |                                                                                                                  | 37.6-62.4               |        |               |                   |                      |
|      | Quite easy                                                                                     |                                                                                                                  | 62.5-87.4               |        |               |                   |                      |
|      | Very easy                                                                                      |                                                                                                                  | 87.5-100                |        |               |                   |                      |
|      |                                                                                                | <b>Who provides mental health support in your school?</b>                                                        | Class teacher           | Y      | Tick box      | Prim*;<br>Sec; FE | 2021                 |
|      | Teaching assistants                                                                            |                                                                                                                  | Y                       |        |               |                   |                      |
|      | Another adult in school                                                                        |                                                                                                                  | Y                       |        |               |                   |                      |
|      | A mental health worker (from outside school) who visits the school                             |                                                                                                                  | Y                       |        |               |                   |                      |
|      |                                                                                                |                                                                                                                  |                         |        |               |                   |                      |
|      |                                                                                                | <b>If you felt you needed to speak to someone to get mental health support what would you do?</b>                | Speak to a parent/carer | Y      | Tick box      | Prim; Sec;<br>FE  | 2020*; 2021*         |
|      | Speak to another family member                                                                 |                                                                                                                  | Y                       |        |               |                   |                      |
|      | Speak to a friend                                                                              |                                                                                                                  | Y                       |        |               |                   |                      |
|      | Speak to someone who works at school (e.g. teacher, class assistant or other adults in school) |                                                                                                                  | Y                       |        |               |                   |                      |
|      | Look for help online (e.g. Childline, Mind)                                                    |                                                                                                                  | Y                       |        |               |                   |                      |
|      | Speak to another adult I trust (e.g. a mental health worker who visits the school)             |                                                                                                                  | Y                       |        |               |                   |                      |
|      | Nothing                                                                                        |                                                                                                                  | Y                       |        |               |                   |                      |
|      | Other                                                                                          |                                                                                                                  | Y                       |        |               |                   |                      |
|      |                                                                                                |                                                                                                                  |                         |        |               |                   |                      |
|      |                                                                                                |                                                                                                                  |                         |        |               |                   |                      |

Note: A \* in the Matched or Year Included columns indicates that the Question or Label column contain differences in the \* indicated year or survey version

OxWell 2012 Primary  
**RELATIONSHIPS**

| CODE | Contingent | Question                                                                               | Label                              | Value     | Type   | Matched          | Year Included |
|------|------------|----------------------------------------------------------------------------------------|------------------------------------|-----------|--------|------------------|---------------|
|      |            | <b>How easy do you find it to make and keep friends?</b>                               | <i>Very difficult</i>              | 0-12.5    | String | Prim; Sec;<br>FE | 2019; 2021    |
|      |            |                                                                                        | <i>Quite difficult</i>             | 12.6-37.5 |        |                  |               |
|      |            |                                                                                        | <i>Sometimes difficult</i>         | 37.6-62.4 |        |                  |               |
|      |            |                                                                                        | <i>Quite easy</i>                  | 62.5-87.4 |        |                  |               |
|      |            |                                                                                        | <i>Very easy</i>                   | 87.5-100  |        |                  |               |
|      |            | <b>How well do you get along with other people in your household?</b>                  | <i>Very well or well</i>           | WELL      | String | Prim; Sec;<br>FE | 2020; 2021    |
|      |            |                                                                                        | <i>Most of the time well</i>       | WELLMOST  |        |                  |               |
|      |            |                                                                                        | <i>Not well or not at all well</i> | NOTWELL   |        |                  |               |
|      |            | <b>How well do you get along with your friends?</b>                                    | <i>Very well or well</i>           | WELL      | String | Prim; Sec;<br>FE | 2020; 2021    |
|      |            |                                                                                        | <i>Most of the time well</i>       | WELLMOST  |        |                  |               |
|      |            |                                                                                        | <i>Not well or not at all well</i> | NOTWELL   |        |                  |               |
|      |            | <b>How often do you feel that you have no one to talk to (in person/online/phone)?</b> | <i>Hardly ever or never</i>        | NEVER     | String | Prim; Sec;<br>FE | 2020; 2021    |
|      |            |                                                                                        | <i>Some of the time</i>            | SOMETIMES |        |                  |               |
|      |            |                                                                                        | <i>Often</i>                       | OFTEN     |        |                  |               |
|      |            | <b>How often do you feel left out?</b>                                                 | <i>Hardly ever or never</i>        | NEVER     | String | Prim; Sec;<br>FE | 2020; 2021    |
|      |            |                                                                                        | <i>Some of the time</i>            | SOMETIMES |        |                  |               |
|      |            |                                                                                        | <i>Often</i>                       | OFTEN     |        |                  |               |
|      |            | <b>How often do you feel alone?</b>                                                    | <i>Hardly ever or never</i>        | NEVER     | String | Prim; Sec;<br>FE | 2021          |
|      |            |                                                                                        | <i>Some of the time</i>            | SOMETIMES |        |                  |               |
|      |            |                                                                                        | <i>Often</i>                       | OFTEN     |        |                  |               |
|      |            | <b>How often do you feel lonely?</b>                                                   | <i>Hardly ever or never</i>        | NEVER     | String | Prim; Sec;<br>FE | 2020; 2021    |
|      |            |                                                                                        | <i>Some of the time</i>            | SOMETIMES |        |                  |               |
|      |            |                                                                                        | <i>Often</i>                       | OFTEN     |        |                  |               |

Note: A \* in the *Matched* or *Year Included* columns indicates that the *Question* or *Label* column contain differences in the \* indicated year or survey version

## OxWell 2012 Primary

**RESEARCH**

| CODE | Contingent | Question                                                                                                                                                             | Label                                                         | Value                                                     | Type          | Matched           | Year Included            |
|------|------------|----------------------------------------------------------------------------------------------------------------------------------------------------------------------|---------------------------------------------------------------|-----------------------------------------------------------|---------------|-------------------|--------------------------|
|      |            | <b><i>If this survey asked you to tell us your name, so that we would know who you are, would you still take part?</i></b>                                           | Yes<br>No<br>Maybe<br>I don't understand                      | Y<br>N<br>MAYBE<br>D                                      | String        | Prim; Sec;<br>FE  | 2021                     |
|      |            | <b><i>Did you also complete this survey last year at school?</i></b>                                                                                                 | Yes<br>No<br>I can't remember                                 | Y<br>N<br>NOMEMORY                                        | String        | Prim; Sec;<br>FE  | 2020; 2021*              |
|      |            | <b><i>If this survey asked you to tell us your name, so that we would know who you are, would you still take part?</i></b>                                           | Not at all<br>Not much<br>Some<br>Quite a lot<br>A great deal | 0-12.5<br>12.6-37.5<br>37.6-62.4<br>62.5-87.4<br>87.5-100 | Sliding scale | Prim*;<br>Sec; FE | 2019*;<br>2020;<br>2021* |
|      |            | <b><i>If this survey asked you to tell us your name, so that we would know who you are, would you have answered any of questions in this survey differently?</i></b> | Not at all<br>Not much<br>Some<br>Quite a lot<br>A great deal | 0-12.5<br>12.6-37.5<br>37.6-62.4<br>62.5-87.4<br>87.5-100 | Sliding scale | Prim*;<br>Sec; FE | 2019*;<br>2020;<br>2021* |

Note: A \* in the *Matched* or *Year Included* columns indicates that the *Question* or *Label* column contain differences in the \* indicated year or survey version
