# Supplementary material for: Study protocol: the OxWell school survey investigating social, emotional and behavioural factors associated with mental health and well-being
Source: HighWire-hosted journal article supplement (doi:10.1136/bmjopen-2021-052717), 2021-11-01
Supplement: bmjopen-2021-052717supp003_data_supplement.pdf [file bmjopen-2021-052717supp003_data_supplement.pdf]

# OxWell VARIABLE GUIDE 2021

## Questionnaire: Secondary (Years 8-11)

For the most up-to-date versions, please see <https://osf.io/sekhr/>

### Contents

#### Variable Guide Table of Contents

|                                     |    |
|-------------------------------------|----|
| <b>DEMOGRAPHICS</b> .....           | 2  |
| <b>DIET AND FOOD POVERTY</b> .....  | 3  |
| <b>SLEEP</b> .....                  | 4  |
| <b>EXERCISE</b> .....               | 7  |
| <b>SUBSTANCE USE</b> .....          | 10 |
| <b>GAMBLING</b> .....               | 14 |
| <b>DOMESTIC ABUSE</b> .....         | 15 |
| <b>SCHOOL EXPERIENCE</b> .....      | 17 |
| <b>SAFETY</b> .....                 | 23 |
| <b>INTERNET</b> .....               | 25 |
| <b>GAMING</b> .....                 | 27 |
| <b>COVID</b> .....                  | 28 |
| <b>BULLYING</b> .....               | 30 |
| <b>SELF-HARM</b> .....              | 32 |
| <b>MENTAL HEALTH</b> .....          | 41 |
| <b>MENTAL HEALTH SERVICES</b> ..... | 47 |
| <b>RELATIONSHIPS</b> .....          | 55 |
| <b>SEXUAL HEALTH</b> .....          | 56 |
| <b>RESEARCH</b> .....               | 57 |
| <b>PARANOIA</b> .....               | 58 |

OxWell 2021 Secondary  
**DEMOGRAPHICS**

| CODE | Contingent | Question                                         | Label                                                                                                                                                                                                                                                                                                                                                                             | Value                                                                                        | Type    | Matched            | Year Included        |
|------|------------|--------------------------------------------------|-----------------------------------------------------------------------------------------------------------------------------------------------------------------------------------------------------------------------------------------------------------------------------------------------------------------------------------------------------------------------------------|----------------------------------------------------------------------------------------------|---------|--------------------|----------------------|
|      |            | <b>Please enter your Year Group</b>              | <i>Year group</i>                                                                                                                                                                                                                                                                                                                                                                 | 8 - 11                                                                                       | Numeric | Prim; Sec;<br>FE   | 2019, 2020,<br>2021  |
|      |            | <b>Are you male or female?</b>                   | <i>Male</i><br><i>Female</i><br><i>Other/ Prefer not to answer</i>                                                                                                                                                                                                                                                                                                                | M<br>F<br>R                                                                                  | String  | Prim;<br>Sec*; FE* | 2019, 2020,<br>2021* |
|      |            | <b>How old are you</b>                           | <i>Age in full years</i>                                                                                                                                                                                                                                                                                                                                                          | 11 - 16                                                                                      | Numeric | Prim; Sec;<br>FE   | 2019, 2020,<br>2021  |
|      |            | <b>Who do you live with?</b>                     | <i>I live with both of my parents</i><br><i>I live with one of my parents</i><br><i>My parents are separated and I live in two homes</i><br><i>I live with other relatives or adoptive parents</i><br><i>I live with other people (foster carers, foster home, childrens home)</i><br><i>I live in more than one place</i><br><i>I live somewhere else I would rather not say</i> | PARENTS<br>PARENT<br>SEPARATED<br>PARENT<br>RELATIVE<br>OTHERHOM<br>E<br>MANY<br>OTHER<br>RF | String  | Prim; Sec;<br>FE   | 2019*;<br>2020;2021  |
|      |            | <b>Is your home rented?</b>                      | <i>Yes</i><br><i>No</i><br><i>Don't know</i>                                                                                                                                                                                                                                                                                                                                      | Y<br>N<br>R                                                                                  | String  | Prim; Sec;<br>FE   | 2021                 |
|      |            | <b>Were you born in the UK</b>                   | <i>Yes</i><br><i>No</i><br><i>Would rather not say</i>                                                                                                                                                                                                                                                                                                                            | Y<br>N<br>R                                                                                  | String  | Prim; Sec;<br>FE   | 2019*;2020;<br>2021  |
|      |            | <b>Were both of your parents born in the UK?</b> | <i>Yes</i><br><i>No</i><br><i>Would rather not say</i>                                                                                                                                                                                                                                                                                                                            | Y<br>N<br>R                                                                                  | String  | Prim; Sec;<br>FE   | 2019*;2020;<br>2021  |

Note: A \* in the Matched or Year Included columns indicates that the Question or Label column contain differences in the \* indicated year or survey version

## OxWell 2021 Secondary

**DIET AND FOOD POVERTY**

| CODE | Contingent | Question                                                                                                                                   | Label                | Value     | Type          | Matched          | Year Included       |
|------|------------|--------------------------------------------------------------------------------------------------------------------------------------------|----------------------|-----------|---------------|------------------|---------------------|
|      |            | <b><i>Do you usually eat breakfast?</i></b>                                                                                                | <i>Never</i>         | 0-12.5    | Sliding scale | Prim; Sec;<br>FE | 2019; 2020;<br>2021 |
|      |            |                                                                                                                                            | <i>Not often</i>     | 12.6-37.5 |               |                  |                     |
|      |            |                                                                                                                                            | <i>Sometimes</i>     | 37.6-62.4 |               |                  |                     |
|      |            |                                                                                                                                            | <i>Usually</i>       | 62.5-87.4 |               |                  |                     |
|      |            |                                                                                                                                            | <i>Every morning</i> | 87.5-100  |               |                  |                     |
|      |            | <b><i>Some young people go to school or to bed hungry because there is not enough food at home. How often does this happen to you?</i></b> | <i>Not at all</i>    | 0-12.5    | Sliding scale | Prim; Sec;<br>FE | 2019; 2020;<br>2021 |
|      |            |                                                                                                                                            | <i>Once or twice</i> | 12.6-37.5 |               |                  |                     |
|      |            |                                                                                                                                            | <i>Sometimes</i>     | 37.6-62.4 |               |                  |                     |
|      |            |                                                                                                                                            | <i>Most days</i>     | 62.5-87.4 |               |                  |                     |
|      |            |                                                                                                                                            | <i>Every day</i>     | 87.5-100  |               |                  |                     |

Note: A \* in the *Matched* or *Year Included* columns indicates that the *Question* or *Label* column contain differences in the \* indicated year or survey version

## OxWell 2021 Secondary

**SLEEP**

| CODE | Contingent | Question                                                              | Label                              | Value     | Type          | Matched          | Year Included |
|------|------------|-----------------------------------------------------------------------|------------------------------------|-----------|---------------|------------------|---------------|
|      |            | <b>How long do you usually take to fall asleep?</b>                   | <i>0 mins</i>                      | 0-12.5    | Sliding scale | Prim; Sec;<br>FE | 2021          |
|      |            |                                                                       | <i>30 mins (half an hour)</i>      | 12.6-37.5 |               |                  |               |
|      |            |                                                                       | <i>60 mins (1 hour)</i>            | 37.6-62.4 |               |                  |               |
|      |            |                                                                       | <i>90 mins (1.5 hours)</i>         | 62.5-87.4 |               |                  |               |
|      |            |                                                                       | <i>120+ mins (2 hours or more)</i> | 87.5-100  |               |                  |               |
|      |            | <b>What time do you usually go to bed on a school night?</b>          | <i>6pm</i>                         | 0-12.5    | Sliding scale | Prim; Sec;<br>FE | 2021          |
|      |            |                                                                       | <i>8pm</i>                         | 12.6-37.5 |               |                  |               |
|      |            |                                                                       | <i>10pm</i>                        | 37.6-62.4 |               |                  |               |
|      |            |                                                                       | <i>12 midnight</i>                 | 62.5-87.4 |               |                  |               |
|      |            |                                                                       | <i>2am or later</i>                | 87.5-100  |               |                  |               |
|      |            | <b>What time do you usually try to fall asleep on a school night?</b> | <i>6pm</i>                         | 0-12.5    | Sliding scale | Prim; Sec;<br>FE | 2021          |
|      |            |                                                                       | <i>8pm</i>                         | 12.6-37.5 |               |                  |               |
|      |            |                                                                       | <i>10pm</i>                        | 37.6-62.4 |               |                  |               |
|      |            |                                                                       | <i>12 midnight</i>                 | 62.5-87.4 |               |                  |               |
|      |            |                                                                       | <i>2am or later</i>                | 87.5-100  |               |                  |               |
|      |            | <b>What time do you usually wake up on a school day?</b>              | <i>5am</i>                         | 0-12.5    | Sliding scale | Prim; Sec;<br>FE | 2021          |
|      |            |                                                                       | <i>7am</i>                         | 12.6-37.5 |               |                  |               |
|      |            |                                                                       | <i>9am</i>                         | 37.6-62.4 |               |                  |               |
|      |            |                                                                       | <i>11am</i>                        | 62.5-87.4 |               |                  |               |
|      |            |                                                                       | <i>1pm or later</i>                | 87.5-100  |               |                  |               |
|      |            | <b>What time do you usually go to bed at the weekend?</b>             | <i>6pm</i>                         | 0-12.5    | Sliding scale | Prim; Sec;<br>FE | 2021          |
|      |            |                                                                       | <i>8pm</i>                         | 12.6-37.5 |               |                  |               |
|      |            |                                                                       | <i>10pm</i>                        | 37.6-62.4 |               |                  |               |
|      |            |                                                                       | <i>12 midnight</i>                 | 62.5-87.4 |               |                  |               |
|      |            |                                                                       | <i>2am or later</i>                | 87.5-100  |               |                  |               |
|      |            | <b>What time do you usually try to fall asleep at the weekend?</b>    | <i>6pm</i>                         | 0-12.5    | Sliding scale | Prim; Sec;<br>FE | 2021          |
|      |            |                                                                       | <i>8pm</i>                         | 12.6-37.5 |               |                  |               |
|      |            |                                                                       | <i>10pm</i>                        | 37.6-62.4 |               |                  |               |
|      |            |                                                                       | <i>12 midnight</i>                 | 62.5-87.4 |               |                  |               |
|      |            |                                                                       | <i>2am or later</i>                | 87.5-100  |               |                  |               |
|      |            | <b>What time do you usually wake up at the weekend?</b>               | <i>5am</i>                         | 0-12.5    | Sliding scale | Prim; Sec;<br>FE | 2021          |
|      |            |                                                                       | <i>7am</i>                         | 12.6-37.5 |               |                  |               |
|      |            |                                                                       | <i>9am</i>                         | 37.6-62.4 |               |                  |               |

Note: A \* in the *Matched* or *Year Included* columns indicates that the *Question* or *Label* column contain differences in the \* indicated year or survey version

## OxWell 2021 Secondary

|  |                                                                                                                                                                                                        |                              |           |               |               |      |
|--|--------------------------------------------------------------------------------------------------------------------------------------------------------------------------------------------------------|------------------------------|-----------|---------------|---------------|------|
|  |                                                                                                                                                                                                        | 11am                         | 62.5-87.4 |               |               |      |
|  |                                                                                                                                                                                                        | 1pm or later                 | 87.5-100  |               |               |      |
|  | <b>People sometimes feel sleepy during the daytime. During your daytime activities, how much of a problem do you have with sleepiness (feeling sleepy, struggling to stay awake)?</b>                  | No problem at all            | 0-12.5    | Sliding scale | Prim; Sec; FE | 2021 |
|  |                                                                                                                                                                                                        | A little problem             | 12.6-37.5 |               |               |      |
|  |                                                                                                                                                                                                        | More than a little problem   | 37.6-62.4 |               |               |      |
|  |                                                                                                                                                                                                        | A big problem                | 62.5-87.4 |               |               |      |
|  |                                                                                                                                                                                                        | A very big problem           | 87.5-100  |               |               |      |
|  | <b>Thinking about the past month, to what extent has poor sleep troubled you in general?</b>                                                                                                           | Not at all                   | NOTATALL  | String        | Prim; Sec; FE | 2021 |
|  |                                                                                                                                                                                                        | A little                     | LITTLE    |               |               |      |
|  |                                                                                                                                                                                                        | Somewhat                     | SOMEWHAT  |               |               |      |
|  |                                                                                                                                                                                                        | Much                         | MUCH      |               |               |      |
|  |                                                                                                                                                                                                        | Very much                    | VERYMUCH  |               |               |      |
|  | <b>Thinking about a typical night in the last month, how many nights a week do you have a problem with your sleep?</b>                                                                                 | 0-1                          | 0TO1      | String        | Prim; Sec; FE | 2021 |
|  |                                                                                                                                                                                                        | 2                            | 2         |               |               |      |
|  |                                                                                                                                                                                                        | 3                            | 3         |               |               |      |
|  |                                                                                                                                                                                                        | 4                            | 4         |               |               |      |
|  |                                                                                                                                                                                                        | 5-7                          | 5TO7      |               |               |      |
|  | <b>On a school night (when you have lessons the next day), who usually sets your bedtime?</b>                                                                                                          | Yourself                     | SELF      | String        | Prim; Sec; FE | 2021 |
|  |                                                                                                                                                                                                        | Parent/carer/guardian/       | CARER     |               |               |      |
|  |                                                                                                                                                                                                        | other family member          | ##        |               |               |      |
|  |                                                                                                                                                                                                        | other                        | OTHER     |               |               |      |
|  | <b>On a weekend night (no lessons the next day), who usually sets your bedtime?</b>                                                                                                                    | Yourself                     | SELF      | String        | Prim; Sec; FE | 2021 |
|  |                                                                                                                                                                                                        | Parent/carer/guardian/       | CARER     |               |               |      |
|  |                                                                                                                                                                                                        | other family member          | ##        |               |               |      |
|  |                                                                                                                                                                                                        | other                        | OTHER     |               |               |      |
|  | <b>On school nights (when you have lessons the next day), do you have a rule or set time in your house about when you are supposed to turn off or put away computers, phones or other electronics?</b> | Yes                          | Y         | String        | Prim; Sec; FE | 2021 |
|  |                                                                                                                                                                                                        | No                           | N         |               |               |      |
|  | <b>How often do you use social media (e.g. tik-tok, instagram) in the hour before you intend to go to sleep?</b>                                                                                       | Never                        | 0-12.5    | Sliding scale | Prim; Sec; FE | 2021 |
|  |                                                                                                                                                                                                        | Rarely (1-2 times a month)   | 12.6-37.5 |               |               |      |
|  |                                                                                                                                                                                                        | Sometimes (1-2 times a week) | 37.6-62.4 |               |               |      |
|  |                                                                                                                                                                                                        | Often (3-4 times a week)     | 62.5-87.4 |               |               |      |
|  |                                                                                                                                                                                                        | Daily                        | 87.5-100  |               |               |      |

Note: A \* in the Matched or Year Included columns indicates that the Question or Label column contain differences in the \* indicated year or survey version

## OxWell 2021 Secondary

|                                                                                                                                                                                      |                                     |           |               |                  |      |
|--------------------------------------------------------------------------------------------------------------------------------------------------------------------------------------|-------------------------------------|-----------|---------------|------------------|------|
| <b>How often do you play video games in the hour before you intend to go to sleep (including games on consoles, computer, tablet, mobile phone or other portable gaming device)?</b> | <i>Never</i>                        | 0-12.5    | Sliding scale | Prim; Sec;<br>FE | 2021 |
|                                                                                                                                                                                      | <i>Rarely (1-2 times a month)</i>   | 12.6-37.5 |               |                  |      |
|                                                                                                                                                                                      | <i>Sometimes (1-2 times a week)</i> | 37.6-62.4 |               |                  |      |
|                                                                                                                                                                                      | <i>Often (3-4 times a week)</i>     | 62.5-87.4 |               |                  |      |
|                                                                                                                                                                                      | <i>Daily</i>                        | 87.5-100  |               |                  |      |

Note: A \* in the *Matched* or *Year Included* columns indicates that the *Question* or *Label* column contain differences in the \* indicated year or survey version

## OxWell 2021 Secondary

**EXERCISE**

| CODE | Contingent | Question                                                                                                                       | Label                   | Value     | Type          | Matched          | Year Included |
|------|------------|--------------------------------------------------------------------------------------------------------------------------------|-------------------------|-----------|---------------|------------------|---------------|
|      |            | <b>About how many hours physical activity or exercise do you do over a whole week (in and out of school, during term-time)</b> | <i>1 hour or less)</i>  | 0-12.5    | Sliding scale | Prim; Sec;<br>FE | 2020; 2021*   |
|      |            |                                                                                                                                | <i>3 hours</i>          | 12.6-37.5 |               |                  |               |
|      |            |                                                                                                                                | <i>6 hours</i>          | 37.6-62.4 |               |                  |               |
|      |            |                                                                                                                                | <i>9 hours</i>          | 62.5-87.4 |               |                  |               |
|      |            |                                                                                                                                | <i>12 hours or more</i> | 87.5-100  |               |                  |               |
|      |            | <b>How many times per week do you normally do PE/sports during school time?</b>                                                | <i>0</i>                | 0-12.5    | Sliding scale | Prim; Sec;<br>FE | 2021          |
|      |            |                                                                                                                                | <i>3</i>                | 12.6-37.5 |               |                  |               |
|      |            |                                                                                                                                | <i>6</i>                | 37.6-62.4 |               |                  |               |
|      |            |                                                                                                                                | <i>9</i>                | 62.5-87.4 |               |                  |               |
|      |            |                                                                                                                                | <i>12 or more</i>       | 87.5-100  |               |                  |               |
|      |            | <b>How many times per week do you do sports or exercise outside of school hours?</b>                                           | <i>0</i>                | 0-12.5    | Sliding scale | Prim; Sec;<br>FE | 2021          |
|      |            |                                                                                                                                | <i>3</i>                | 12.6-37.5 |               |                  |               |
|      |            |                                                                                                                                | <i>6</i>                | 37.6-62.4 |               |                  |               |
|      |            |                                                                                                                                | <i>9</i>                | 62.5-87.4 |               |                  |               |
|      |            |                                                                                                                                | <i>12 or more</i>       | 87.5-100  |               |                  |               |
|      |            | <b>Is most of your exercise at school or outside of school?</b>                                                                | <i>Only at</i>          | 0-12.5    | Sliding scale | Prim; Sec;<br>FE | 2021          |
|      |            |                                                                                                                                | <i>Mostly at</i>        | 12.6-37.5 |               |                  |               |
|      |            |                                                                                                                                | <i>Same in/out of</i>   | 37.6-62.4 |               |                  |               |
|      |            |                                                                                                                                | <i>Mostly outside</i>   | 62.5-87.4 |               |                  |               |
|      |            |                                                                                                                                | <i>All outside</i>      | 87.5-100  |               |                  |               |
|      |            | <b>Compared to before the first lockdown, how much time do you spend doing sports or exercise now?</b>                         | <i>Much less</i>        | 0-12.5    | Sliding scale | Prim; Sec;<br>FE | 2021          |
|      |            |                                                                                                                                | <i>Slightly less</i>    | 12.6-37.5 |               |                  |               |
|      |            |                                                                                                                                | <i>The same amount</i>  | 37.6-62.4 |               |                  |               |
|      |            |                                                                                                                                | <i>Slightly more</i>    | 62.5-87.4 |               |                  |               |
|      |            |                                                                                                                                | <i>Much more</i>        | 87.5-100  |               |                  |               |
|      |            | <b>How much do you enjoy physical exercise outside of school time?</b>                                                         | <i>Never</i>            | 0-12.5    | Sliding scale | Prim; Sec;<br>FE | 2021          |
|      |            |                                                                                                                                | <i>Not often</i>        | 12.6-37.5 |               |                  |               |
|      |            |                                                                                                                                | <i>Sometimes</i>        | 37.6-62.4 |               |                  |               |
|      |            |                                                                                                                                | <i>Quite often</i>      | 62.5-87.4 |               |                  |               |
|      |            |                                                                                                                                | <i>Always</i>           | 87.5-100  |               |                  |               |
|      |            | <b>Would you like to do more sports/exercise?</b>                                                                              | <i>Yes</i>              | Y         | String        | Prim; Sec;<br>FE | 2020; 2021    |
|      |            |                                                                                                                                | <i>No</i>               | N         |               |                  |               |
|      |            | <b>How much do you normally enjoy your PE lessons?</b>                                                                         | <i>Never</i>            | 0-12.5    | String        |                  | 2020; 2021    |

Note: A \* in the Matched or Year Included columns indicates that the Question or Label column contain differences in the \* indicated year or survey version

## OxWell 2021 Secondary

|  |                                                                                           |                             |           |               |               |                  |
|--|-------------------------------------------------------------------------------------------|-----------------------------|-----------|---------------|---------------|------------------|
|  |                                                                                           | <i>Not often</i>            | 12.6-37.5 |               | Prim; Sec; FE |                  |
|  |                                                                                           | <i>Sometimes</i>            | 37.6-62.4 |               |               |                  |
|  |                                                                                           | <i>Quite often</i>          | 62.5-87.4 |               |               |                  |
|  |                                                                                           | <i>Always</i>               | 87.5-100  |               |               |                  |
|  | <b>How important are the following in your decision to do sport or physical activity:</b> |                             |           |               |               |                  |
|  | <b>Spend time with friends and meet new people</b>                                        | <i>Not at all important</i> | 0-12.5    | Sliding scale | Prim; Sec; FE | 2019; 2021       |
|  |                                                                                           | <i>Not very important</i>   | 12.6-37.5 |               |               |                  |
|  |                                                                                           | <i>Quite important</i>      | 37.6-62.4 |               |               |                  |
|  |                                                                                           | <i>Important</i>            | 62.5-87.4 |               |               |                  |
|  |                                                                                           | <i>Very important</i>       | 87.5-100  |               |               |                  |
|  | <b>Exercise get fit</b>                                                                   | <i>Not at all important</i> | 0-12.5    | Sliding scale | Prim; Sec; FE | 2019; 2020; 2021 |
|  |                                                                                           | <i>Not very important</i>   | 12.6-37.5 |               |               |                  |
|  |                                                                                           | <i>Quite important</i>      | 37.6-62.4 |               |               |                  |
|  |                                                                                           | <i>Important</i>            | 62.5-87.4 |               |               |                  |
|  |                                                                                           | <i>Very important</i>       | 87.5-100  |               |               |                  |
|  | <b>Unwind/reduce stress</b>                                                               | <i>Not at all important</i> | 0-12.5    | Sliding scale | Prim; Sec; FE | 2019; 2020; 2021 |
|  |                                                                                           | <i>Not very important</i>   | 12.6-37.5 |               |               |                  |
|  |                                                                                           | <i>Quite important</i>      | 37.6-62.4 |               |               |                  |
|  |                                                                                           | <i>Important</i>            | 62.5-87.4 |               |               |                  |
|  |                                                                                           | <i>Very important</i>       | 87.5-100  |               |               |                  |
|  | <b>Weight management/body shaping</b>                                                     | <i>Not at all important</i> | 0-12.5    | Sliding scale | Prim; Sec; FE | 2019; 2020; 2021 |
|  |                                                                                           | <i>Not very important</i>   | 12.6-37.5 |               |               |                  |
|  |                                                                                           | <i>Quite important</i>      | 37.6-62.4 |               |               |                  |
|  |                                                                                           | <i>Important</i>            | 62.5-87.4 |               |               |                  |
|  |                                                                                           | <i>Very important</i>       | 87.5-100  |               |               |                  |
|  | <b>Learn a new skill</b>                                                                  | <i>Not at all important</i> | 0-12.5    | Sliding scale | Prim; Sec; FE | 2019; 2020; 2021 |
|  |                                                                                           | <i>Not very important</i>   | 12.6-37.5 |               |               |                  |
|  |                                                                                           | <i>Quite important</i>      | 37.6-62.4 |               |               |                  |
|  |                                                                                           | <i>Important</i>            | 62.5-87.4 |               |               |                  |
|  |                                                                                           | <i>Very important</i>       | 87.5-100  |               |               |                  |
|  | <b>Improve performance/do well competitively</b>                                          | <i>Not at all important</i> | 0-12.5    | Sliding scale | Prim; Sec; FE | 2019; 2020; 2021 |
|  |                                                                                           | <i>Not very important</i>   | 12.6-37.5 |               |               |                  |
|  |                                                                                           | <i>Quite important</i>      | 37.6-62.4 |               |               |                  |
|  |                                                                                           | <i>Important</i>            | 62.5-87.4 |               |               |                  |
|  |                                                                                           | <i>Very important</i>       | 87.5-100  |               |               |                  |
|  | <b>Enjoyment - feeling good physically/mentally</b>                                       | <i>Not at all important</i> | 0-12.5    | Sliding scale | Prim; Sec; FE | 2019; 2020; 2021 |
|  |                                                                                           | <i>Not very important</i>   | 12.6-37.5 |               |               |                  |
|  |                                                                                           | <i>Quite important</i>      | 37.6-62.4 |               |               |                  |
|  |                                                                                           | <i>Important</i>            | 62.5-87.4 |               |               |                  |
|  |                                                                                           | <i>Very important</i>       | 87.5-100  |               |               |                  |
|  | <b>Have to do it for others - school/team/family</b>                                      | <i>Not at all important</i> | 0-12.5    | Sliding scale |               |                  |

Note: A \* in the *Matched* or *Year Included* columns indicates that the *Question* or *Label* column contain differences in the \* indicated year or survey version



## OxWell 2021 Secondary

|  |                                                                             |                                                                            |                   |               |               |                  |
|--|-----------------------------------------------------------------------------|----------------------------------------------------------------------------|-------------------|---------------|---------------|------------------|
|  |                                                                             | <i>Not very important</i>                                                  | 12.6-37.5         |               | Prim; Sec; FE | 2019; 2020; 2021 |
|  |                                                                             | <i>Quite important</i>                                                     | 37.6-62.4         |               |               |                  |
|  |                                                                             | <i>Important</i>                                                           | 62.5-87.4         |               |               |                  |
|  |                                                                             | <i>Very important</i>                                                      | 87.5-100          |               |               |                  |
|  | <b>How do you normally (i.e. for most of the journey) travel to school?</b> | <i>I travel by vehicle (e.g. bus, car, van, train, motorbike)</i>          | TRAVELVEH<br>ICLE | Sliding scale | Prim; Sec; FE | 2019*; 2021      |
|  |                                                                             | <i>I do not travel by vehicle (e.g. walk, cycle, skate, skoot, blades)</i> | TRAVELWAL<br>K    |               |               |                  |

Note: A \* in the *Matched* or *Year Included* columns indicates that the *Question* or *Label* column contain differences in the \* indicated year or survey version

OxWell 2021 Secondary  
**SUBSTANCE USE**

| CODE | Contingent | Question                                                                | Label                                      | Value      | Type          | Matched  | Year Included |
|------|------------|-------------------------------------------------------------------------|--------------------------------------------|------------|---------------|----------|---------------|
|      |            | <b>Do you smoke cigarettes (i.e. tobacco, NOT vaping/e-cigarettes)?</b> | <i>Never</i>                               | 0-12.5     | Sliding scale | Sec*; FE | 2019; 2020*   |
|      |            |                                                                         | <i>Not often (once or twice)</i>           | 12.6-37.5  |               |          |               |
|      |            |                                                                         | <i>Sometimes (monthly)</i>                 | 37.6-62.4  |               |          |               |
|      |            |                                                                         | <i>Quite often (weekly)</i>                | 62.5-87.4  |               |          |               |
|      |            |                                                                         | <i>Most days</i>                           | 87.5-100   |               |          |               |
|      |            | <b>Do you use e-cigarettes (vaping)?</b>                                | <i>Never</i>                               | 0-12.5     | Sliding scale | Sec*; FE | 2019; 2020*   |
|      |            |                                                                         | <i>Not often (once or twice)</i>           | 12.6-37.5  |               |          |               |
|      |            |                                                                         | <i>Sometimes (monthly)</i>                 | 37.6-62.4  |               |          |               |
|      |            |                                                                         | <i>Quite often (weekly)</i>                | 62.5-87.4  |               |          |               |
|      |            |                                                                         | <i>Most days</i>                           | 87.5-100   |               |          |               |
|      |            | <b>Have you ever had an alcoholic drink?</b>                            | <i>Never</i>                               | 0-12.5     | Sliding scale | Sec*; FE | 2019; 2020*   |
|      |            |                                                                         | <i>Not often (once or twice)</i>           | 12.6-37.5  |               |          |               |
|      |            |                                                                         | <i>Sometimes (monthly)</i>                 | 37.6-62.4  |               |          |               |
|      |            |                                                                         | <i>Quite often (weekly)</i>                | 62.5-87.4  |               |          |               |
|      |            |                                                                         | <i>Most days</i>                           | 87.5-100   |               |          |               |
|      |            | <b>When did you last have an alcoholic drink?</b>                       | <i>Today</i>                               | TODAY      | String        | Sec; FE  | 2020          |
|      |            |                                                                         | <i>Yesterday</i>                           | YESTERDAY  |               |          |               |
|      |            |                                                                         | <i>Some other time in the last 7 days</i>  | LAST7DAYS  |               |          |               |
|      |            |                                                                         | <i>1 week, but less than 2 weeks ago</i>   | 1TO2WEEKS  |               |          |               |
|      |            |                                                                         | <i>2 weeks, but less than 4 weeks ago</i>  | 2TO4WEEKS  |               |          |               |
|      |            |                                                                         | <i>1 month, but less than 6 months ago</i> | 1TO6MONTHS |               |          |               |
|      |            |                                                                         | <i>6 months ago or more</i>                | GT6MONTHS  |               |          |               |
|      |            | <b>Have you ever been drunk?</b>                                        | <i>Never</i>                               | 0-12.5     | Sliding scale | Sec*; FE | 2019; 2020*   |
|      |            |                                                                         | <i>Once</i>                                | 12.6-37.5  |               |          |               |
|      |            |                                                                         | <i>2-3 times</i>                           | 37.6-62.4  |               |          |               |
|      |            |                                                                         | <i>4-10 times</i>                          | 62.5-87.4  |               |          |               |
|      |            |                                                                         | <i>More than 10 times</i>                  | 87.5-100   |               |          |               |
|      |            | <b>Have you been drunk in the last 7 days?</b>                          | <i>Yes</i>                                 | Y          | String        | Sec; Fe  | 2020          |
|      |            |                                                                         | <i>No</i>                                  | N          |               |          |               |
|      |            | <b>When you drink alcohol, where are you USUALLY?</b>                   | <i>At home</i>                             | HOME       | String        | Sec; Fe  | 2020          |

Note: A \* in the Matched or Year Included columns indicates that the Question or Label column contain differences in the \* indicated year or survey version

## OxWell 2021 Secondary

|  |                                                                                                                                                                                    |                                                                                                                                                                                            |                                                                                    |        |          |              |
|--|------------------------------------------------------------------------------------------------------------------------------------------------------------------------------------|--------------------------------------------------------------------------------------------------------------------------------------------------------------------------------------------|------------------------------------------------------------------------------------|--------|----------|--------------|
|  |                                                                                                                                                                                    | At someone else's home<br>At a party<br>In a pub or a bar In a club, disco or gig/festival<br>At school<br>Out on the street, in a park or other outdoor area<br>Somewhere else            | HOMEELSE<br>PARTY<br>PUB<br>SCHOOL<br>OUTDOOR<br>ELSEWHERE                         |        |          |              |
|  | <b>Have you ever been offered something to get you high or drugs not prescribed by your doctor (examples are illegal drugs, legal highs and prescription medication)?</b>          | Yes<br>No                                                                                                                                                                                  | Y<br>N                                                                             | String | Sec*; FE | 2019; 2020*  |
|  | <b>Have you ever taken something to get high or self-medicated with drugs not prescribed by your doctor (examples are illegal drugs, legal highs and prescription medication)?</b> | Never<br>Yes – Once<br>Yes – On more than one occasion                                                                                                                                     | N<br>YONCE<br>YMORE                                                                | String | Sec*; FE | 2019*; 2020* |
|  | <b>The first time you used drugs, how did you get them?</b>                                                                                                                        | From someone I know from school<br>From someone I know who is not from my school<br>From a friend of a friend<br>From a stranger<br>From a website/online/internet                         | SCHOOLFRI<br>END<br>NOTSCHOO<br>LFRIEND<br>FRIENDSFRI<br>EDS<br>STRANGER<br>ONLINE | String | Sec; FE  | 2020         |
|  | <b>Where were you the first time you used drugs?</b>                                                                                                                               | At home<br>At someone else's home<br>At a party<br>In a pub or a bar In a club, disco or gig/festival<br>At school<br>Out on the street, in a park or other outdoor area<br>Somewhere else | HOME<br>HOMEELSE<br>PARTY<br>PUB<br>SCHOOL<br>OUTDOOR<br>ELSEWHERE                 | String | Sec; FE  | 2021         |
|  | <b>Where were you the last time you used drugs?</b>                                                                                                                                | At home<br>At someone else's home<br>At a party<br>In a pub or a bar In a club, disco or gig/festival                                                                                      | HOME<br>HOMEELSE<br>PARTY<br>PUB                                                   | String | Sec; FE  | 2021         |

Note: A \* in the Matched or Year Included columns indicates that the Question or Label column contain differences in the \* indicated year or survey version

## OxWell 2021 Secondary

|  |                                                                                                                                                                              |                                                    |               |               |         |            |
|--|------------------------------------------------------------------------------------------------------------------------------------------------------------------------------|----------------------------------------------------|---------------|---------------|---------|------------|
|  |                                                                                                                                                                              | At school                                          | SCHOOL        |               |         |            |
|  |                                                                                                                                                                              | Out on the street, in a park or other outdoor area | OUTDOOR       |               |         |            |
|  |                                                                                                                                                                              | Somewhere else                                     | ELSEWHERE     |               |         |            |
|  | <b>The last time you used drugs, did you use them all yourself or did you sell or give some to someone else?</b>                                                             | I used it all myself                               | SELF          | String        | Sec; FE | 2021       |
|  |                                                                                                                                                                              | I sold some of it                                  | SOLDSOME      |               |         |            |
|  |                                                                                                                                                                              | I gave some of it away                             | GIFTED        |               |         |            |
|  |                                                                                                                                                                              | I both gave some away and sold some                | SOLDANDGIFTED |               |         |            |
|  | <b>When was the last time you ever used or took any of the following?</b>                                                                                                    |                                                    |               | String        | Sec; FE | 2021       |
|  | <b>Cannabis (weed, resin, skunk, CBD)</b>                                                                                                                                    | In the last months                                 | THISMONTH     |               |         |            |
|  |                                                                                                                                                                              | In the last year                                   | THISYEAR      |               |         |            |
|  |                                                                                                                                                                              | More than a year ago                               | GTYEAR        |               |         |            |
|  |                                                                                                                                                                              | Never                                              | N             |               |         |            |
|  | <b>Nitrous Oxide (NO, NOS, N2O, laughing gas, balloons)</b>                                                                                                                  | In the last months                                 | THISMONTH     |               |         |            |
|  |                                                                                                                                                                              | In the last year                                   | THISYEAR      |               |         |            |
|  |                                                                                                                                                                              | More than a year ago                               | GTYEAR        |               |         |            |
|  |                                                                                                                                                                              | Never                                              | N             |               |         |            |
|  | <b>Ketamine (ket, special K, keta, gummies)</b>                                                                                                                              | In the last months                                 | THISMONTH     |               |         |            |
|  |                                                                                                                                                                              | In the last year                                   | THISYEAR      |               |         |            |
|  |                                                                                                                                                                              | More than a year ago                               | GTYEAR        |               |         |            |
|  |                                                                                                                                                                              | Never                                              | N             |               |         |            |
|  | <b>Ecstasy/MDMA (E, eccies, mandy, molly)</b>                                                                                                                                | In the last months                                 | THISMONTH     |               |         |            |
|  |                                                                                                                                                                              | In the last year                                   | THISYEAR      |               |         |            |
|  |                                                                                                                                                                              | More than a year ago                               | GTYEAR        |               |         |            |
|  |                                                                                                                                                                              | Never                                              | N             |               |         |            |
|  | <b>Benzodiazepines (benzos, vallies, diazepam, xanax, etizolam)</b>                                                                                                          | In the last months                                 | THISMONTH     |               |         |            |
|  |                                                                                                                                                                              | In the last year                                   | THISYEAR      |               |         |            |
|  |                                                                                                                                                                              | More than a year ago                               | GTYEAR        |               |         |            |
|  |                                                                                                                                                                              | Never                                              | N             |               |         |            |
|  | <b>Other (amphetamines like speed, cocaine, mephedrone, legal highs, psychedelics like LSD, acid, magic mushrooms, psilocybin, DMT, 2C, opioids like Fentanyl or Heroin)</b> | In the last months                                 | THISMONTH     |               |         |            |
|  |                                                                                                                                                                              | In the last year                                   | THISYEAR      |               |         |            |
|  |                                                                                                                                                                              | More than a year ago                               | GTYEAR        |               |         |            |
|  |                                                                                                                                                                              | Never                                              | N             |               |         |            |
|  | <b>How easy would it be for you to get illegal drugs if you wanted to?</b>                                                                                                   | Very difficult                                     | 0-12.5        | Sliding scale | Sec; FE | 2020; 2021 |
|  |                                                                                                                                                                              | Difficult                                          | 12.6-37.5     |               |         |            |
|  |                                                                                                                                                                              | Neither difficult nor easy                         | 37.6-62.4     |               |         |            |

Note: A \* in the Matched or Year Included columns indicates that the Question or Label column contain differences in the \* indicated year or survey version

## OxWell 2021 Secondary

|  |                                                                                 |                                                                 |                      |          |         |      |
|--|---------------------------------------------------------------------------------|-----------------------------------------------------------------|----------------------|----------|---------|------|
|  |                                                                                 | <i>Quite easy</i>                                               | 62.5-87.4            |          |         |      |
|  |                                                                                 | <i>Very easy</i>                                                | 87.5-100             |          |         |      |
|  | <b><i>Have you ever been encouraged or felt pressured to sell drugs?</i></b>    | <i>No - I have not been encouraged or pressured</i>             | N                    | String   | Sec; FE | 2021 |
|  |                                                                                 | <i>Yes - I have been pressured</i>                              | YPRESSURE            |          |         |      |
|  |                                                                                 | <i>Yes - I have been encouraged</i>                             | D<br>YENCOURA<br>GED |          |         |      |
|  | <b><i>If you wanted information about drugs, who/where would you go to?</i></b> | <i>Teacher</i>                                                  | Y                    | Tick box | Sec; FE | 2021 |
|  |                                                                                 | <i>Parent(s)/Carer</i>                                          | Y                    |          |         |      |
|  |                                                                                 | <i>Friend(s)</i>                                                | Y                    |          |         |      |
|  |                                                                                 | <i>Drug service</i>                                             | Y                    |          |         |      |
|  |                                                                                 | <i>Search engine (e.g. Google)</i>                              | Y                    |          |         |      |
|  |                                                                                 | <i>A specific internet site (Talk to Frank, Know the Score)</i> | Y                    |          |         |      |
|  |                                                                                 | <i>An internet site, but not one of the ones listed above</i>   | Y                    |          |         |      |
|  |                                                                                 | <i>Don't know</i>                                               | Y                    |          |         |      |

Note: A \* in the *Matched* or *Year Included* columns indicates that the *Question* or *Label* column contain differences in the \* indicated year or survey version

## OxWell 2021 Secondary

**GAMBLING**

| CODE | Contingent | Question                                                         | Label          | Value     | Type          | Matched  | Year Included |
|------|------------|------------------------------------------------------------------|----------------|-----------|---------------|----------|---------------|
|      |            | <b><i>Have you ever tried online gambling?</i></b>               | Yes            | Y         | String        | Sec*; FE | 2020; 2021    |
|      |            |                                                                  | No             | N         |               |          |               |
|      |            | <b><i>Have you ever used real money for online gambling?</i></b> | Never          | 0-12.5    | Sliding scale | Sec*; FE | 2020; 2021    |
|      |            |                                                                  | Once or twice  | 12.6-37.5 |               |          |               |
|      |            |                                                                  | A few times    | 37.6-62.4 |               |          |               |
|      |            |                                                                  | Weekly         | 62.5-87.4 |               |          |               |
|      |            |                                                                  | Daily          | 87.5-100  |               |          |               |
|      |            | <b><i>Do you owe money to someone who isn't family?</i></b>      | No             | 0-12.5    | Sliding scale | Sec*; FE | 2020; 2021    |
|      |            |                                                                  | Yes – a little | 12.6-37.5 |               |          |               |
|      |            |                                                                  | Yes – a lot    | 37.6-62.4 |               |          |               |

Note: A \* in the *Matched* or *Year Included* columns indicates that the *Question* or *Label* column contain differences in the \* indicated year or survey version

OxWell 2021 Secondary  
**DOMESTIC ABUSE**

| CODE | Contingent | Question                                                                                                                                                                 | Label         | Value | Type     | Matched | Year Included |
|------|------------|--------------------------------------------------------------------------------------------------------------------------------------------------------------------------|---------------|-------|----------|---------|---------------|
|      |            | <b>Physical Abuse: Did a parent or other adult in the household hit, beat, kick or physically try to hurt you in any way?</b>                                            |               | Y     | Tick box | Sec; FE | 2021          |
|      |            | <b>Yes, it has happened in my life</b>                                                                                                                                   | Once or twice | YONCE | String   | Sec; FE | 2021          |
|      |            |                                                                                                                                                                          | Many times    | YMANY |          |         |               |
|      |            | <b>Yes, it has happened in the past twelve months</b>                                                                                                                    | Once or twice | YONCE | String   | Sec; FE | 2021          |
|      |            |                                                                                                                                                                          | Many times    | YMANY |          |         |               |
|      |            | <b>Emotional abuse: Did a parent or other adult in the household swear at you, insult you, humiliate you, threaten you or make you feel unwanted?</b>                    |               | Y     | Tick box | Sec; FE | 2021          |
|      |            | <b>Yes, it has happened in my life</b>                                                                                                                                   | Once or twice | YONCE | String   | Sec; FE | 2021          |
|      |            |                                                                                                                                                                          | Many times    | YMANY |          |         |               |
|      |            | <b>Yes, it has happened in the past twelve months</b>                                                                                                                    | Once or twice | YONCE | String   | Sec; FE | 2021          |
|      |            |                                                                                                                                                                          | Many times    | YMANY |          |         |               |
|      |            | <b>Sexual abuse: Did someone at least five years older than you or an adult touch or fondle you or have you touch their body in a sexual way?</b>                        |               | Y     | Tick box | Sec; FE | 2021          |
|      |            | <b>Yes, it has happened in my life</b>                                                                                                                                   | Once or twice | YONCE | String   | Sec; FE | 2021          |
|      |            |                                                                                                                                                                          | Many times    | YMANY |          |         |               |
|      |            | <b>Yes, it has happened in the past twelve months</b>                                                                                                                    | Once or twice | YONCE | String   | Sec; FE | 2021          |
|      |            |                                                                                                                                                                          | Many times    | YMANY |          |         |               |
|      |            | <b>Physical neglect: Did your parent/caregiver for long periods of time not provide you with enough food or drink, clean clothes, or a clean and warm place to live?</b> |               | Y     | Tick box | Sec; FE | 2021          |
|      |            | <b>Yes, it has happened in my life</b>                                                                                                                                   | Once or twice | YONCE | String   | Sec; FE | 2021          |
|      |            |                                                                                                                                                                          | Many times    | YMANY |          |         |               |
|      |            | <b>Yes, it has happened in the past twelve months</b>                                                                                                                    | Once or twice | YONCE | String   | Sec; FE | 2021          |
|      |            |                                                                                                                                                                          | Many times    | YMANY |          |         |               |
|      |            | <b>Emotional neglect: Were there times when there was no adult living with you who made you feel loved?</b>                                                              |               | Y     | Tick box | Sec; FE | 2021          |
|      |            | <b>Yes, it has happened in my life</b>                                                                                                                                   | Once or twice | YONCE | String   | Sec; FE | 2021          |
|      |            |                                                                                                                                                                          | Many times    | YMANY |          |         |               |
|      |            | <b>Yes, it has happened in the past twelve months</b>                                                                                                                    | Once or twice | YONCE | String   | Sec; FE | 2021          |
|      |            |                                                                                                                                                                          | Many times    | YMANY |          |         |               |
|      |            | <b>Witnessing parental violence: Did you see or hear one of your parents/carers being slapped, kicked, punched, beaten or deliberately hurt by a partner or ex</b>       |               | Y     | Tick box | Sec; FE | 2021          |
|      |            | <b>Yes, it has happened in my life</b>                                                                                                                                   | Once or twice | YONCE | String   | Sec; FE | 2021          |
|      |            |                                                                                                                                                                          | Many times    | YMANY |          |         |               |
|      |            | <b>Yes, it has happened in the past twelve months</b>                                                                                                                    | Once or twice | YONCE | String   | Sec; FE | 2021          |
|      |            |                                                                                                                                                                          | Many times    | YMANY |          |         |               |

Note: A \* in the Matched or Year Included columns indicates that the Question or Label column contain differences in the \* indicated year or survey version

## OxWell 2021 Secondary

|  |                                                                                             |                             |           |               |         |            |
|--|---------------------------------------------------------------------------------------------|-----------------------------|-----------|---------------|---------|------------|
|  | <b><i>Have you ever been a victim of abuse from a friend/peer/boyfriend/girlfriend?</i></b> | <i>Never</i>                | 0-12.5    | Sliding scale | Sec; FE | 2019; 2021 |
|  |                                                                                             | <i>Not often</i>            | 12.6-37.5 |               |         |            |
|  |                                                                                             | <i>Sometimes</i>            | 37.6-62.4 |               |         |            |
|  |                                                                                             | <i>Quite often</i>          | 62.5-87.4 |               |         |            |
|  |                                                                                             | <i>Most days</i>            | 87.5-100  |               |         |            |
|  | <b><i>Is this abuse still happening?</i></b>                                                | <i>Yes</i>                  | Y         | String        | Sec; FE | 2019; 2021 |
|  |                                                                                             | <i>No</i>                   | N         |               |         |            |
|  | <b><i>How old is he/she?</i></b>                                                            | <i>About the same age</i>   | SAME      | String        | Sec; FE | 2019; 2021 |
|  |                                                                                             | <i>Younger</i>              | YOUNGER   |               |         |            |
|  |                                                                                             | <i>Older</i>                | OLDER     |               |         |            |
|  |                                                                                             | <i>An adult</i>             | ADULT     |               |         |            |
|  |                                                                                             | <i>Would rather not say</i> | R         |               |         |            |

Note: A \* in the *Matched* or *Year Included* columns indicates that the *Question* or *Label* column contain differences in the \* indicated year or survey version



## OxWell 2021 Secondary

**SCHOOL EXPERIENCE**

| CODE | Contingent | Question                                                                                                    | Label                             | Value     | Type          | Matched          | Year Included       |
|------|------------|-------------------------------------------------------------------------------------------------------------|-----------------------------------|-----------|---------------|------------------|---------------------|
|      |            | <b>How much help and support with learning do you feel that you get at school?</b>                          | <i>No help at all</i>             | 0-12.5    | Sliding scale | Prim; Sec;<br>FE | 2019; 2020;<br>2021 |
|      |            |                                                                                                             | <i>Not enough help</i>            | 12.6-37.5 |               |                  |                     |
|      |            |                                                                                                             | <i>Just about enough help</i>     | 37.6-62.4 |               |                  |                     |
|      |            |                                                                                                             | <i>Most of the help I need</i>    | 62.5-87.4 |               |                  |                     |
|      |            |                                                                                                             | <i>All of the help I need</i>     | 87.5-100  |               |                  |                     |
|      |            | <b>How much help and support do you feel you get with your homework from the people you live with?</b>      | <i>No help at all</i>             | 0-12.5    | Sliding scale | Prim; Sec;<br>FE | 2019; 2020;<br>2021 |
|      |            |                                                                                                             | <i>Not enough help</i>            | 12.6-37.5 |               |                  |                     |
|      |            |                                                                                                             | <i>Just about enough help</i>     | 37.6-62.4 |               |                  |                     |
|      |            |                                                                                                             | <i>Most of the help I need</i>    | 62.5-87.4 |               |                  |                     |
|      |            |                                                                                                             | <i>All of the help I need</i>     | 87.5-100  |               |                  |                     |
|      |            |                                                                                                             | <i>No</i>                         | N         |               |                  |                     |
|      |            | <b>How would you describe being at your school?</b>                                                         |                                   |           |               |                  | 2019*; 2021         |
|      |            | <b>I enjoy my school</b>                                                                                    | <i>Strongly Disagree</i>          | 0-12.5    | Sliding scale | Prim; Sec;<br>FE | 2019; 2021          |
|      |            |                                                                                                             | <i>Disagree</i>                   | 12.6-37.5 |               |                  |                     |
|      |            |                                                                                                             | <i>Neither Agree nor disagree</i> | 37.6-62.4 |               |                  |                     |
|      |            |                                                                                                             | <i>Agree</i>                      | 62.5-87.4 |               |                  |                     |
|      |            |                                                                                                             | <i>Strongly Agree</i>             | 87.5-100  |               |                  |                     |
|      |            | <b>I try my best at school</b>                                                                              | <i>Strongly Disagree</i>          | 0-12.5    | Sliding scale | Prim; Sec;<br>FE | 2019; 2021          |
|      |            |                                                                                                             | <i>Disagree</i>                   | 12.6-37.5 |               |                  |                     |
|      |            |                                                                                                             | <i>Neither Agree nor disagree</i> | 37.6-62.4 |               |                  |                     |
|      |            |                                                                                                             | <i>Agree</i>                      | 62.5-87.4 |               |                  |                     |
|      |            |                                                                                                             | <i>Strongly Agree</i>             | 87.5-100  |               |                  |                     |
|      |            | <b>I learn a lot at school</b>                                                                              | <i>Strongly Disagree</i>          | 0-12.5    | Sliding scale | Prim; Sec;<br>FE | 2019; 2021          |
|      |            |                                                                                                             | <i>Disagree</i>                   | 12.6-37.5 |               |                  |                     |
|      |            |                                                                                                             | <i>Neither Agree nor disagree</i> | 37.6-62.4 |               |                  |                     |
|      |            |                                                                                                             | <i>Agree</i>                      | 62.5-87.4 |               |                  |                     |
|      |            |                                                                                                             | <i>Strongly Agree</i>             | 87.5-100  |               |                  |                     |
|      |            | <b>My school is giving me useful skills and knowledge</b>                                                   | <i>Strongly Disagree</i>          | 0-12.5    | Sliding scale | Prim; Sec;<br>FE | 2019; 2021          |
|      |            |                                                                                                             | <i>Disagree</i>                   | 12.6-37.5 |               |                  |                     |
|      |            |                                                                                                             | <i>Neither Agree nor disagree</i> | 37.6-62.4 |               |                  |                     |
|      |            |                                                                                                             | <i>Agree</i>                      | 62.5-87.4 |               |                  |                     |
|      |            |                                                                                                             | <i>Strongly Agree</i>             | 87.5-100  |               |                  |                     |
|      |            | <b>My school has lots of activities (like sport and drama) to take part in at lunchtime or after school</b> | <i>Strongly Disagree</i>          | 0-12.5    | Sliding scale | Prim; Sec;<br>FE | 2019; 2021          |
|      |            |                                                                                                             | <i>Disagree</i>                   | 12.6-37.5 |               |                  |                     |
|      |            |                                                                                                             | <i>Neither Agree nor disagree</i> | 37.6-62.4 |               |                  |                     |

Note: A \* in the *Matched* or *Year Included* columns indicates that the *Question* or *Label* column contain differences in the \* indicated year or survey version

## OxWell 2021 Secondary

|                                                                  |                            |           |               |                 |            |
|------------------------------------------------------------------|----------------------------|-----------|---------------|-----------------|------------|
| <b>My teacher(s) make my lessons fun and interesting</b>         | Agree                      | 62.5-87.4 | Sliding scale | Prim; Sec; FE*  | 2019; 2021 |
|                                                                  | Strongly Agree             | 87.5-100  |               |                 |            |
|                                                                  | Strongly Disagree          | 0-12.5    |               |                 |            |
|                                                                  | Disagree                   | 12.6-37.5 |               |                 |            |
|                                                                  | Neither Agree nor disagree | 37.6-62.4 |               |                 |            |
| <b>My teacher(s) tell me how I am doing with my work</b>         | Agree                      | 62.5-87.4 | Sliding scale | Prim; Sec; FE*  | 2019; 2021 |
|                                                                  | Strongly Agree             | 87.5-100  |               |                 |            |
|                                                                  | Strongly Disagree          | 0-12.5    |               |                 |            |
|                                                                  | Disagree                   | 12.6-37.5 |               |                 |            |
|                                                                  | Neither Agree nor disagree | 37.6-62.4 |               |                 |            |
| <b>Other pupils often disrupt my lessons</b>                     | Agree                      | 62.5-87.4 | Sliding scale | Prim; Sec; FE   | 2019; 2021 |
|                                                                  | Strongly Agree             | 87.5-100  |               |                 |            |
|                                                                  | Strongly Disagree          | 0-12.5    |               |                 |            |
|                                                                  | Disagree                   | 12.6-37.5 |               |                 |            |
|                                                                  | Neither Agree nor disagree | 37.6-62.4 |               |                 |            |
| <b>I get enough help at school with learning</b>                 | Agree                      | 62.5-87.4 | Sliding scale | Prim; Sec; FE   | 2019; 2021 |
|                                                                  | Strongly Agree             | 87.5-100  |               |                 |            |
|                                                                  | Strongly Disagree          | 0-12.5    |               |                 |            |
|                                                                  | Disagree                   | 12.6-37.5 |               |                 |            |
|                                                                  | Neither Agree nor disagree | 37.6-62.4 |               |                 |            |
| <b>I get enough help at school with emotional/pastoral needs</b> | Agree                      | 62.5-87.4 | Sliding scale | Prim; Sec*; FE* | 2019; 2021 |
|                                                                  | Strongly Agree             | 87.5-100  |               |                 |            |
|                                                                  | Strongly Disagree          | 0-12.5    |               |                 |            |
|                                                                  | Disagree                   | 12.6-37.5 |               |                 |            |
|                                                                  | Neither Agree nor disagree | 37.6-62.4 |               |                 |            |
| <b>I feel stressed by school work</b>                            | Agree                      | 62.5-87.4 | Sliding scale | Prim; Sec; FE   | 2019; 2021 |
|                                                                  | Strongly Agree             | 87.5-100  |               |                 |            |
|                                                                  | Strongly Disagree          | 0-12.5    |               |                 |            |
|                                                                  | Disagree                   | 12.6-37.5 |               |                 |            |
|                                                                  | Neither Agree nor disagree | 37.6-62.4 |               |                 |            |
| <b>I worry about going to school</b>                             | Agree                      | 62.5-87.4 | Sliding scale | Prim; Sec; FE   | 2019; 2021 |
|                                                                  | Strongly Agree             | 87.5-100  |               |                 |            |
|                                                                  | Strongly Disagree          | 0-12.5    |               |                 |            |
|                                                                  | Disagree                   | 12.6-37.5 |               |                 |            |
|                                                                  | Neither Agree nor disagree | 37.6-62.4 |               |                 |            |
| <b>I am often in trouble</b>                                     | Agree                      | 62.5-87.4 | Sliding scale |                 | 2019; 2021 |
|                                                                  | Strongly Agree             | 87.5-100  |               |                 |            |
|                                                                  | Strongly Disagree          | 0-12.5    |               |                 |            |

Note: A \* in the Matched or Year Included columns indicates that the Question or Label column contain differences in the \* indicated year or survey version

## OxWell 2021 Secondary

|  |                                                                                                         |                                   |           |               |                  |            |
|--|---------------------------------------------------------------------------------------------------------|-----------------------------------|-----------|---------------|------------------|------------|
|  |                                                                                                         | <i>Disagree</i>                   | 12.6-37.5 |               | Prim; Sec;<br>FE |            |
|  |                                                                                                         | <i>Neither Agree nor disagree</i> | 37.6-62.4 |               |                  |            |
|  |                                                                                                         | <i>Agree</i>                      | 62.5-87.4 |               |                  |            |
|  |                                                                                                         | <i>Strongly Agree</i>             | 87.5-100  |               |                  |            |
|  | <b><i>I am often aggressive or violent</i></b>                                                          | <i>Strongly Disagree</i>          | 0-12.5    | Sliding scale | Prim; Sec;<br>FE | 2019; 2021 |
|  |                                                                                                         | <i>Disagree</i>                   | 12.6-37.5 |               |                  |            |
|  |                                                                                                         | <i>Neither Agree nor disagree</i> | 37.6-62.4 |               |                  |            |
|  |                                                                                                         | <i>Agree</i>                      | 62.5-87.4 |               |                  |            |
|  |                                                                                                         | <i>Strongly Agree</i>             | 87.5-100  |               |                  |            |
|  | <b><i>I usually achieve top marks at my school</i></b>                                                  | <i>Strongly Disagree</i>          | 0-12.5    | Sliding scale | Prim; Sec;<br>FE | 2019; 2021 |
|  |                                                                                                         | <i>Disagree</i>                   | 12.6-37.5 |               |                  |            |
|  |                                                                                                         | <i>Neither Agree nor disagree</i> | 37.6-62.4 |               |                  |            |
|  |                                                                                                         | <i>Agree</i>                      | 62.5-87.4 |               |                  |            |
|  |                                                                                                         | <i>Strongly Agree</i>             | 87.5-100  |               |                  |            |
|  | <b><i>I am happy to use the school toilets</i></b>                                                      | <i>Strongly Disagree</i>          | 0-12.5    | Sliding scale | Prim; Sec;<br>FE | 2019; 2021 |
|  |                                                                                                         | <i>Disagree</i>                   | 12.6-37.5 |               |                  |            |
|  |                                                                                                         | <i>Neither Agree nor disagree</i> | 37.6-62.4 |               |                  |            |
|  |                                                                                                         | <i>Agree</i>                      | 62.5-87.4 |               |                  |            |
|  |                                                                                                         | <i>Strongly Agree</i>             | 87.5-100  |               |                  |            |
|  | <b><i>About speaking out:</i></b>                                                                       |                                   |           | String        | Prim; Sec;<br>FE | 2021       |
|  | <b><i>Adults in my school/college ask for my opinion on things</i></b>                                  | <i>Never/ Rarely</i>              | NEVER     |               |                  |            |
|  |                                                                                                         | <i>Sometimes</i>                  | SOMETIMES |               |                  |            |
|  |                                                                                                         | <i>Often</i>                      | OFTEN     |               |                  |            |
|  | <b><i>Adults in my school/college listen when I share my opinion</i></b>                                | <i>Never/ Rarely</i>              | NEVER     |               |                  |            |
|  |                                                                                                         | <i>Sometimes</i>                  | SOMETIMES |               |                  |            |
|  |                                                                                                         | <i>Often</i>                      | OFTEN     |               |                  |            |
|  | <b><i>My school/college friends ask my advice when they have a problem</i></b>                          | <i>Never/ Rarely</i>              | NEVER     |               |                  |            |
|  |                                                                                                         | <i>Sometimes</i>                  | SOMETIMES |               |                  |            |
|  |                                                                                                         | <i>Often</i>                      | OFTEN     |               |                  |            |
|  | <b><i>If I see something wrong in school/college I feel I can tell someone and they will listen</i></b> | <i>Never/ Rarely</i>              | NEVER     |               |                  |            |
|  |                                                                                                         | <i>Sometimes</i>                  | SOMETIMES |               |                  |            |
|  |                                                                                                         | <i>Often</i>                      | OFTEN     |               |                  |            |
|  | <b><i>I can speak up in class when I have a comment or question</i></b>                                 | <i>Never/ Rarely</i>              | NEVER     |               |                  |            |
|  |                                                                                                         | <i>Sometimes</i>                  | SOMETIMES |               |                  |            |
|  |                                                                                                         | <i>Often</i>                      | OFTEN     |               |                  |            |
|  | <b><i>I can speak up when I see someone else being hurt</i></b>                                         | <i>Never/ Rarely</i>              | NEVER     |               |                  |            |
|  |                                                                                                         | <i>Sometimes</i>                  | SOMETIMES |               |                  |            |
|  |                                                                                                         | <i>Often</i>                      | OFTEN     |               |                  |            |

Note: A \* in the *Matched* or *Year Included* columns indicates that the *Question* or *Label* column contain differences in the \* indicated year or survey version

## OxWell 2021 Secondary

|  |                                                                                                                                   |                                                                                                                                                                          |                                                                                                    |        |                  |            |
|--|-----------------------------------------------------------------------------------------------------------------------------------|--------------------------------------------------------------------------------------------------------------------------------------------------------------------------|----------------------------------------------------------------------------------------------------|--------|------------------|------------|
|  | <b><i>I can ask adults in my school/college for help when I need it</i></b>                                                       | <i>Never/ Rarely</i><br><i>Sometimes</i><br><i>Often</i>                                                                                                                 | NEVER<br>SOMETIMES<br>OFTEN                                                                        |        |                  |            |
|  | <b><i>How much do you agree with the following statement: I identify with my school community</i></b>                             | <i>Fully disagree</i><br><i>Disagree</i><br><i>Somewhat disagree</i><br><i>Neither agree nor disagree</i><br><i>Somewhat agree</i><br><i>Agree</i><br><i>Fully agree</i> | FULLDISAG<br>REE<br>DISAGREE<br>SOMEDISAG<br>REE<br>NEITHER<br>SOMEAGRE<br>E<br>AGREE<br>FULLAGREE | String | Prim; Sec;<br>FE | 2021       |
|  | <b><i>Do you feel your teachers have high expectations of you?</i></b>                                                            | <i>Never</i><br><i>Rarely</i><br><i>Sometimes</i><br><i>Often</i>                                                                                                        | NEVER<br>RARELY<br>SOMETIMES<br>OFTEN                                                              | String | Sec; FE          | 2021       |
|  | <b><i>Over this school year, do you feel you have often been unfairly picked on by a teacher?</i></b>                             | <i>Yes</i><br><i>No</i>                                                                                                                                                  | Y<br>N                                                                                             | String | Sec; FE          | 2021       |
|  | <b><i>At school, are you often told off or punished for things you have not done?</i></b>                                         | <i>Never</i><br><i>Rarely</i><br><i>Sometimes</i><br><i>Often</i>                                                                                                        | NEVER<br>RARELY<br>SOMETIMES<br>OFTEN                                                              | String | Sec; FE          | 2021       |
|  | <b><i>Have you received information from school that enables you to tell whether a friendship or relationship is abusive?</i></b> | <i>Yes</i><br><i>No</i><br><i>Don't know</i>                                                                                                                             | Y<br>N<br>R                                                                                        | String | Sec; Fe          | 2019; 2021 |
|  | <b><i>How many secondary schools have you attended?</i></b>                                                                       | <i>Just one</i><br><i>2</i><br><i>3 or more</i>                                                                                                                          | 1<br>2<br>3ORMORE                                                                                  | String | Sec; FE          | 2021       |
|  | <b><i>During this academic year, have you ever been asked to leave your place of learning because of your behaviour?</i></b>      | <i>No</i><br><i>Once or twice this year</i><br><i>Several times this year</i><br><i>Frequently this year</i>                                                             | N<br>1TO2<br>SEVERAL<br>FREQUENTL<br>Y                                                             | String | Sec; FE          | 2021       |

Note: A \* in the *Matched* or *Year Included* columns indicates that the *Question* or *Label* column contain differences in the \* indicated year or survey version

## OxWell 2021 Secondary

|  |                                                                                                                |                                                                                                                                                                                                                                           |                                                           |               |         |                  |
|--|----------------------------------------------------------------------------------------------------------------|-------------------------------------------------------------------------------------------------------------------------------------------------------------------------------------------------------------------------------------------|-----------------------------------------------------------|---------------|---------|------------------|
|  | <b>Where did you go to last time you were asked to leave your place of learning?</b>                           | Outside the classroom (e.g. corridor)<br>A senior teacher's office<br>A dedicated area that is used for students who have been sent out of the class<br>Another place in school used to isolate/separate students<br>I went home<br>Other | Y<br>Y<br>Y<br>Y<br>Y<br>Y                                | Tick box      | Sec; FE | 2021             |
|  | <b>What impact did being asked to leave the classroom have on you?</b>                                         | I found it helpful<br>I found it unhelpful<br>No impact                                                                                                                                                                                   | HELPFUL<br>NOTHELPFUL<br>NO                               | String        | Sec; FE | 2021             |
|  | <b>During this academic year, have you ever been given a detention?</b>                                        | No<br>Once or twice this year<br>Several times this year<br>Frequently this year                                                                                                                                                          | N<br>1TO2<br>SEVERAL<br>FREQUENTLY                        | String        | Sec; FE | 2021             |
|  | <b>Have you ever been excluded from school?</b>                                                                | Yes<br>No<br>Don't know what this means                                                                                                                                                                                                   | Y<br>N<br>D                                               | String        | Sec; FE | 2021             |
|  | <b>Was this ever a permanent exclusion?</b>                                                                    | Yes<br>No<br>Don't know what this means                                                                                                                                                                                                   | Y<br>N<br>D                                               | String        | Sec; FE | 2021             |
|  | <b>Do you have enough information and support to help you go onto further education or training?</b>           | Yes<br>No                                                                                                                                                                                                                                 | Y<br>N                                                    | String        | Sec     | 2019; 2020; 2021 |
|  | <b>Thinking into the future, how likely is it that you will try to go on to further education or training?</b> | No at all likely<br>Not very likely<br>Neither likely nor unlikely<br>Quite likely<br>Very likely                                                                                                                                         | 0-12.5<br>12.6-37.5<br>37.6-62.4<br>62.5-87.4<br>87.5-100 | Sliding scale | Sec     | 2019; 2020; 2021 |

Note: A \* in the *Matched* or *Year Included* columns indicates that the *Question* or *Label* column contain differences in the \* indicated year or survey version

## OxWell 2021 Secondary

|  |                                                                                                        |                           |           |               |     |      |
|--|--------------------------------------------------------------------------------------------------------|---------------------------|-----------|---------------|-----|------|
|  | <b>How useful has the careers advice that you have had been in helping you to plan for the future?</b> | <i>Not useful at all</i>  | 0-12.5    | Sliding scale | Sec | 2021 |
|  |                                                                                                        | <i>Not very useful</i>    | 12.6-37.5 |               |     |      |
|  |                                                                                                        | <i>Not sure/Dont know</i> | 37.6-62.4 |               |     |      |
|  |                                                                                                        | <i>Quite useful</i>       | 62.5-87.4 |               |     |      |
|  |                                                                                                        | <i>Very useful</i>        | 87.5-100  |               |     |      |

Note: A \* in the *Matched* or *Year Included* columns indicates that the *Question* or *Label* column contain differences in the \* indicated year or survey version

## OxWell 2021 Secondary

**SAFETY**

| CODE | Contingent | Question                                                                                                                          | Label                          | Value     | Type          | Matched       | Year Included    |
|------|------------|-----------------------------------------------------------------------------------------------------------------------------------|--------------------------------|-----------|---------------|---------------|------------------|
|      |            | <b>When you are at school, how safe do you feel?</b>                                                                              | <i>Very unsafe</i>             | 0-12.5    | Sliding scale | Prim; Sec; FE | 2019; 2020; 2021 |
|      |            |                                                                                                                                   | <i>Unsafe</i>                  | 12.6-37.5 |               |               |                  |
|      |            |                                                                                                                                   | <i>Neither safe nor unsafe</i> | 37.6-62.4 |               |               |                  |
|      |            |                                                                                                                                   | <i>Safe</i>                    | 62.5-87.4 |               |               |                  |
|      |            |                                                                                                                                   | <i>Very safe</i>               | 87.5-100  |               |               |                  |
|      |            | <b>How safe do you feel at home or the place where you live?</b>                                                                  | <i>Very unsafe</i>             | 0-12.5    | Sliding scale | Prim; Sec; FE | 2019; 2020; 2021 |
|      |            |                                                                                                                                   | <i>Unsafe</i>                  | 12.6-37.5 |               |               |                  |
|      |            |                                                                                                                                   | <i>Neither safe nor unsafe</i> | 37.6-62.4 |               |               |                  |
|      |            |                                                                                                                                   | <i>Safe</i>                    | 62.5-87.4 |               |               |                  |
|      |            |                                                                                                                                   | <i>Very safe</i>               | 87.5-100  |               |               |                  |
|      |            | <b>How safe do you from crime?</b>                                                                                                | <i>Very unsafe</i>             | 0-12.5    | Sliding scale | Prim          | 2019; 2021       |
|      |            |                                                                                                                                   | <i>Unsafe</i>                  | 12.6-37.5 |               |               |                  |
|      |            |                                                                                                                                   | <i>Neither safe nor unsafe</i> | 37.6-62.4 |               |               |                  |
|      |            |                                                                                                                                   | <i>Safe</i>                    | 62.5-87.4 |               |               |                  |
|      |            |                                                                                                                                   | <i>Very safe</i>               | 87.5-100  |               |               |                  |
|      |            | <b>Some young people feel worried about things happening around them. To what extent do you worry about the following topics:</b> |                                |           |               |               |                  |
|      |            | <b>Having enough money to pay for food or living costs</b>                                                                        | <i>Not at all worried</i>      | 0-12.5    | Sliding scale | Sec; FE       | 2020; 2021       |
|      |            |                                                                                                                                   | <i>Not very worried</i>        | 12.6-37.5 |               |               |                  |
|      |            |                                                                                                                                   | <i>Quite worried</i>           | 37.6-62.4 |               |               |                  |
|      |            |                                                                                                                                   | <i>Worried</i>                 | 62.5-87.4 |               |               |                  |
|      |            |                                                                                                                                   | <i>Extremely worried</i>       | 87.5-100  |               |               |                  |
|      |            | <b>Doing well at school</b>                                                                                                       | <i>Not at all worried</i>      | 0-12.5    | Sliding scale | Sec; FE       | 2020; 2021       |
|      |            |                                                                                                                                   | <i>Not very worried</i>        | 12.6-37.5 |               |               |                  |
|      |            |                                                                                                                                   | <i>Quite worried</i>           | 37.6-62.4 |               |               |                  |
|      |            |                                                                                                                                   | <i>Worried</i>                 | 62.5-87.4 |               |               |                  |
|      |            |                                                                                                                                   | <i>Extremely worried</i>       | 87.5-100  |               |               |                  |
|      |            | <b>The climate/environment</b>                                                                                                    | <i>Not at all worried</i>      | 0-12.5    | Sliding scale | Sec; FE       | 2020; 2021       |
|      |            |                                                                                                                                   | <i>Not very worried</i>        | 12.6-37.5 |               |               |                  |
|      |            |                                                                                                                                   | <i>Quite worried</i>           | 37.6-62.4 |               |               |                  |
|      |            |                                                                                                                                   | <i>Worried</i>                 | 62.5-87.4 |               |               |                  |
|      |            |                                                                                                                                   | <i>Extremely worried</i>       | 87.5-100  |               |               |                  |
|      |            | <b>Not being able to sit key school examinations</b>                                                                              | <i>Not at all worried</i>      | 0-12.5    | Sliding scale | Sec; FE       | 2020; 2021       |
|      |            |                                                                                                                                   | <i>Not very worried</i>        | 12.6-37.5 |               |               |                  |
|      |            |                                                                                                                                   | <i>Quite worried</i>           | 37.6-62.4 |               |               |                  |
|      |            |                                                                                                                                   | <i>Worried</i>                 | 62.5-87.4 |               |               |                  |
|      |            |                                                                                                                                   |                                |           |               |               |                  |

Note: A \* in the *Matched* or *Year Included* columns indicates that the *Question* or *Label* column contain differences in the \* indicated year or survey version

## OxWell 2021 Secondary

|                                                   |                           |           |               |         |            |
|---------------------------------------------------|---------------------------|-----------|---------------|---------|------------|
| <b>My appearance (how I look and what I wear)</b> | <i>Extremely worried</i>  | 87.5-100  | Sliding scale | Sec; FE | 2020; 2021 |
|                                                   | <i>Not at all worried</i> | 0-12.5    |               |         |            |
|                                                   | <i>Not very worried</i>   | 12.6-37.5 |               |         |            |
|                                                   | <i>Quite worried</i>      | 37.6-62.4 | Sliding scale | Sec; FE | 2020       |
|                                                   | <i>Worried</i>            | 62.5-87.4 |               |         |            |
|                                                   | <i>Extremely worried</i>  | 87.5-100  |               |         |            |

Note: A \* in the *Matched* or *Year Included* columns indicates that the *Question* or *Label* column contain differences in the \* indicated year or survey version



## OxWell 2021 Secondary

## INTERNET

| CODE | Contingent | Question                                                                               | Label                                           | Value     | Type          | Matched   | Year Included |
|------|------------|----------------------------------------------------------------------------------------|-------------------------------------------------|-----------|---------------|-----------|---------------|
|      |            | <b>Have you ever met a person in the real world that you got to know first online?</b> | Yes                                             | Y         | String        | Prim; Sec | 2019; 2021    |
|      |            |                                                                                        | No                                              | N         |               |           |               |
|      |            | <b>What was the age of the person that you met?</b>                                    | About the same age                              | SAME      | String        | Prim, Sec | 2019; 2021    |
|      |            |                                                                                        | Younger                                         | YOUNGER   |               |           |               |
|      |            |                                                                                        | Older                                           | OLDER     |               |           |               |
|      |            |                                                                                        | An adult                                        | ADULT     |               |           |               |
|      |            |                                                                                        | Would rather not say                            | R         |               |           |               |
|      |            | <b>Did you take someone with you when you met up with them?</b>                        | I went on my own                                | OWN       | String        | Prim, Sec | 2019; 2021    |
|      |            |                                                                                        | I went with a parent/carer                      | PARCAR    |               |           |               |
|      |            |                                                                                        | I went with another adult                       | ADULT     |               |           |               |
|      |            |                                                                                        | I went with my brother/sister                   | SIBLING   |               |           |               |
|      |            |                                                                                        | I went with a friend                            | FRIEND    |               |           |               |
|      |            |                                                                                        |                                                 |           |               |           |               |
|      |            | <b>Have you ever posted or done anything on the internet that you later regretted?</b> | Yes                                             | Y         | String        | Sec; FE   | 2020; 2021    |
|      |            |                                                                                        | No                                              | N         |               |           |               |
|      |            |                                                                                        | Would rather not say                            | R         |               |           |               |
|      |            | <b>How often has this happened?</b>                                                    | Never                                           | 0-12.5    | Sliding scale | Sec; FE   | 2020; 2021    |
|      |            |                                                                                        | Once or twice                                   | 12.6-37.5 |               |           |               |
|      |            |                                                                                        | A few times                                     | 37.6-62.4 |               |           |               |
|      |            |                                                                                        | Weekly                                          | 62.5-87.4 |               |           |               |
|      |            |                                                                                        | Daily                                           | 87.5-100  |               |           |               |
|      |            | <b>Which of the following was this:</b>                                                | Posting a photo/video of yourself               | Y         | Tick box      | Sec; FE   | 2020; 2021    |
|      |            |                                                                                        | Posting a photo/video of someone else           | Y         |               |           |               |
|      |            |                                                                                        | Writing a public comment                        | Y         |               |           |               |
|      |            |                                                                                        | Writing a private comment                       | Y         |               |           |               |
|      |            |                                                                                        | Sending money to someone                        | Y         |               |           |               |
|      |            |                                                                                        | Buying or doing something that might be illegal | Y         |               |           |               |
|      |            |                                                                                        |                                                 |           |               |           |               |

Note: A \* in the Matched or Year Included columns indicates that the Question or Label column contain differences in the \* indicated year or survey version

## OxWell 2021 Secondary

|  |                                                                                                                                                       |                                                            |                                                           |               |         |      |
|--|-------------------------------------------------------------------------------------------------------------------------------------------------------|------------------------------------------------------------|-----------------------------------------------------------|---------------|---------|------|
|  | <b>About how many hours a day do you usually spend on social media?</b>                                                                               | 0 hours<br>1 hour<br>2 hours<br>3 hours<br>4 hours or more | 0-12.5<br>12.6-37.5<br>37.6-62.4<br>62.5-87.4<br>87.5-100 | Sliding scale | Sec; FE | 2021 |
|  | <b>About how many hours a day do you usually play games on an electronic device (e.g. computer, game console or phone)</b>                            | 0 hours<br>1 hour<br>2 hours<br>3 hours<br>4 hours or more | 0-12.5<br>12.6-37.5<br>37.6-62.4<br>62.5-87.4<br>87.5-100 | Sliding scale | Sec; FE | 2021 |
|  | <b>About how many hours a day do you usually play games on a computer or games console (PlayStation, Xbox, Nintendo Wii, etc.) in your free time?</b> | 0 hours<br>1 hour<br>2 hours<br>3 hours<br>4 hours or more | 0-12.5<br>12.6-37.5<br>37.6-62.4<br>62.5-87.4<br>87.5-100 | Sliding scale | Sec; FE | 2021 |
|  | <b>About how many hours a day do you usually play games on your phone in your free time?</b>                                                          | 0 hours<br>1 hour<br>2 hours<br>3 hours<br>4 hours or more | 0-12.5<br>12.6-37.5<br>37.6-62.4<br>62.5-87.4<br>87.5-100 | Sliding scale | Sec; FE | 2021 |

Note: A \* in the *Matched* or *Year Included* columns indicates that the *Question* or *Label* column contain differences in the \* indicated year or survey version

## OxWell 2021 Secondary

**GAMING**

| CODE | Contingent | Question                                                                                                           | Label             | Value     | Type   | Matched | Year Included |
|------|------------|--------------------------------------------------------------------------------------------------------------------|-------------------|-----------|--------|---------|---------------|
|      |            | <b><i>About gaming, how often in the last six months:<br/>did you think about playing a game all day long?</i></b> | <i>Never</i>      | NEVER     | String | Sec; FE | 2021          |
|      |            |                                                                                                                    | <i>Rarely</i>     | RARELY    |        |         |               |
|      |            |                                                                                                                    | <i>Sometimes</i>  | SOMETIMES |        |         |               |
|      |            |                                                                                                                    | <i>Often</i>      | OFTEN     |        |         |               |
|      |            |                                                                                                                    | <i>Very often</i> | VERYOFTEN |        |         |               |
|      |            | <b><i>did you spend increasing amounts of time on games?</i></b>                                                   | <i>Never</i>      | NEVER     | String | Sec; FE | 2021          |
|      |            |                                                                                                                    | <i>Rarely</i>     | RARELY    |        |         |               |
|      |            |                                                                                                                    | <i>Sometimes</i>  | SOMETIMES |        |         |               |
|      |            |                                                                                                                    | <i>Often</i>      | OFTEN     |        |         |               |
|      |            |                                                                                                                    | <i>Very often</i> | VERYOFTEN |        |         |               |
|      |            | <b><i>did you play games to forget about real life?</i></b>                                                        | <i>Never</i>      | NEVER     | String | Sec; FE | 2021          |
|      |            |                                                                                                                    | <i>Rarely</i>     | RARELY    |        |         |               |
|      |            |                                                                                                                    | <i>Sometimes</i>  | SOMETIMES |        |         |               |
|      |            |                                                                                                                    | <i>Often</i>      | OFTEN     |        |         |               |
|      |            |                                                                                                                    | <i>Very often</i> | VERYOFTEN |        |         |               |
|      |            | <b><i>have others unsuccessfully tried to reduce your game use?</i></b>                                            | <i>Never</i>      | NEVER     | String | Sec; FE | 2021          |
|      |            |                                                                                                                    | <i>Rarely</i>     | RARELY    |        |         |               |
|      |            |                                                                                                                    | <i>Sometimes</i>  | SOMETIMES |        |         |               |
|      |            |                                                                                                                    | <i>Often</i>      | OFTEN     |        |         |               |
|      |            |                                                                                                                    | <i>Very often</i> | VERYOFTEN |        |         |               |
|      |            | <b><i>have you felt bad when you were unable to play?</i></b>                                                      | <i>Never</i>      | NEVER     | String | Sec; FE | 2021          |
|      |            |                                                                                                                    | <i>Rarely</i>     | RARELY    |        |         |               |
|      |            |                                                                                                                    | <i>Sometimes</i>  | SOMETIMES |        |         |               |
|      |            |                                                                                                                    | <i>Often</i>      | OFTEN     |        |         |               |
|      |            |                                                                                                                    | <i>Very often</i> | VERYOFTEN |        |         |               |
|      |            | <b><i>did you have fights with others (e.g., family, friends) over your time spent on games?</i></b>               | <i>Never</i>      | NEVER     | String | Sec; FE | 2021          |
|      |            |                                                                                                                    | <i>Rarely</i>     | RARELY    |        |         |               |
|      |            |                                                                                                                    | <i>Sometimes</i>  | SOMETIMES |        |         |               |
|      |            |                                                                                                                    | <i>Often</i>      | OFTEN     |        |         |               |
|      |            |                                                                                                                    | <i>Very often</i> | VERYOFTEN |        |         |               |
|      |            | <b><i>have you neglected other important activities (e.g., school, work, sports) to play games?</i></b>            | <i>Never</i>      | NEVER     | String | Sec; FE | 2021          |
|      |            |                                                                                                                    | <i>Rarely</i>     | RARELY    |        |         |               |
|      |            |                                                                                                                    | <i>Sometimes</i>  | SOMETIMES |        |         |               |
|      |            |                                                                                                                    | <i>Often</i>      | OFTEN     |        |         |               |
|      |            |                                                                                                                    | <i>Very often</i> | VERYOFTEN |        |         |               |
|      |            | <b><i>Have you ever spent money on in-game purchases?</i></b>                                                      | Yes               | Y         | String | Sec; FE | 2021          |
|      |            |                                                                                                                    | No                | N         |        |         |               |

Note: A \* in the Matched or Year Included columns indicates that the Question or Label column contain differences in the \* indicated year or survey version

## OxWell 2021 Secondary

|  |                                                           |                                                                                       |                                                                    |        |         |      |
|--|-----------------------------------------------------------|---------------------------------------------------------------------------------------|--------------------------------------------------------------------|--------|---------|------|
|  | <b>How often do you spend money on in-game purchases?</b> | Never<br>Once<br>Couple of times<br><br>Few times a week<br>Every day<br>All the time | NEVER<br>ONCE<br>TWICE<br>FEWTIMES<br>WEEK<br>EVERYDAY<br>CONSTANT | String | Sec; FE | 2021 |
|--|-----------------------------------------------------------|---------------------------------------------------------------------------------------|--------------------------------------------------------------------|--------|---------|------|

## COVID

| CODE | Contingent | Question                                                                                     | Label                                                                                                                 | Value                                                     | Type          | Matched          | Year Included |
|------|------------|----------------------------------------------------------------------------------------------|-----------------------------------------------------------------------------------------------------------------------|-----------------------------------------------------------|---------------|------------------|---------------|
|      |            | <b>Do you think you have had Covid?</b>                                                      | No<br>Possibly<br>Probably<br>Yes (confirmed by test)                                                                 | N<br>POSSIBLY<br>PROBABLY<br>Y                            | String        | Prim; Sec;<br>FE | 2021          |
|      |            | <b>Compared to before the first lockdown, how easy have you found it to remember things?</b> | Very difficult<br>Quite difficult<br>The same<br>Quite easy<br>Very easy                                              | 0-12.5<br>12.6-37.5<br>37.6-62.4<br>62.5-87.4<br>87.5-100 | Sliding scale | Prim; Sec;<br>FE | 2021          |
|      |            | <b>Compared to before the first lockdown, how easy have you found it to concentrate?</b>     | Very difficult<br>Quite difficult<br>The same<br>Quite easy<br>Very easy                                              | 0-12.5<br>12.6-37.5<br>37.6-62.4<br>62.5-87.4<br>87.5-100 | Sliding scale | Prim; Sec;<br>FE | 2021          |
|      |            | <b>Compared to before the first lockdown, how easy have you found it to think clearly?</b>   | Very difficult<br>Quite difficult<br>The same<br>Quite easy<br>Very easy                                              | 0-12.5<br>12.6-37.5<br>37.6-62.4<br>62.5-87.4<br>87.5-100 | Sliding scale | Prim; Sec;<br>FE | 2021          |
|      |            | <b>Would you take a COVID-19 vaccine (approved for use in the UK) if offered?</b>            | Eager to get a COVID-19 vaccine<br>Willing to get a COVID-19 vaccine<br>Not bothered about getting a COVID-19 vaccine | EAGER<br>WILLING<br>NOTBOTHE<br>RED                       | String        | Prim; Sec;<br>FE | 2021          |

Note: A \* in the Matched or Year Included columns indicates that the Question or Label column contain differences in the \* indicated year or survey version

## OxWell 2021 Secondary

|  |  |                                                |                     |
|--|--|------------------------------------------------|---------------------|
|  |  | <i>Unwilling to get a<br/>COVID-19 vaccine</i> | UNWILLING           |
|  |  | <i>Anti-vaccination for<br/>COVID-19</i>       | ANTIVACCIN<br>ATION |
|  |  | <i>Don't know</i>                              | DONTKNOW            |

Note: A \* in the *Matched* or *Year Included* columns indicates that the *Question* or *Label* column contain differences in the \* indicated year or survey version

## OxWell 2021 Secondary

**BULLYING**

| CODE | Contingent | Question                                                                    | Label                                   | Value     | Type          | Matched           | Year Included           |
|------|------------|-----------------------------------------------------------------------------|-----------------------------------------|-----------|---------------|-------------------|-------------------------|
|      |            | <b>How well do you think your school deals with bullying</b>                | <i>Very badly</i>                       | 0-12.5    | Sliding scale | Prim; Sec;<br>FE  | 2019; 2021              |
|      |            |                                                                             | <i>Not very well</i>                    | 12.6-37.5 |               |                   |                         |
|      |            |                                                                             | <i>Average</i>                          | 37.6-62.4 |               |                   |                         |
|      |            |                                                                             | <i>Quite well</i>                       | 62.5-87.4 |               |                   |                         |
|      |            |                                                                             | <i>Extremely well</i>                   | 87.5-100  |               |                   |                         |
|      |            | <b>Have you been bullied in the last year?</b>                              | <i>No</i>                               | 0-12.5    | Sliding scale | Prim*;<br>Sec; FE | 2019*;<br>2020;<br>2021 |
|      |            |                                                                             | <i>Not often (e.g. once or twice)</i>   | 12.6-37.5 |               |                   |                         |
|      |            |                                                                             | <i>Sometimes (e.g. monthly)</i>         | 37.6-62.4 |               |                   |                         |
|      |            |                                                                             | <i>Quite often (e.g. weekly)</i>        | 62.5-87.4 |               |                   |                         |
|      |            |                                                                             | <i>Most days</i>                        | 87.5-100  |               |                   |                         |
|      |            | <b>Is the bullying still happening?</b>                                     | Yes                                     | Y         | String        | Prim; Sec;<br>FE  | 2019; 2021              |
|      |            |                                                                             | No                                      | N         |               |                   |                         |
|      |            |                                                                             | Would rather not say                    | R         |               |                   |                         |
|      |            | <b>If you have been bullied in the last year in what way did it happen?</b> | Physical                                | Y         | Tick box      | Prim; Sec;<br>FE  | 2019*;<br>2020;<br>2021 |
|      |            |                                                                             | Verbal                                  | Y         |               |                   |                         |
|      |            |                                                                             | Cyber                                   | Y         |               |                   |                         |
|      |            |                                                                             | Isolated or Excluded                    | Y         |               |                   |                         |
|      |            |                                                                             | Other                                   | Y         |               |                   |                         |
|      |            | <b>What age is the bully or bullies?</b>                                    | In my year group                        | SAME      | String        | Sec: FE           | 2021                    |
|      |            |                                                                             | In a younger year group                 | YOUNGER   |               |                   |                         |
|      |            |                                                                             | In an older year group                  | OLDER     |               |                   |                         |
|      |            |                                                                             | Both younger and older year groups      | MIXED     |               |                   |                         |
|      |            |                                                                             | An adult                                | ADULT     |               |                   |                         |
|      |            |                                                                             | Would rather not say                    | R         |               |                   |                         |
|      |            | <b>If you have ever been bullied, did someone help you deal with it?</b>    | Parent, step-parent or carer            | Y         | Tick box      | Prim; Sec;<br>FE  | 2019; 2021*             |
|      |            |                                                                             | Someone else in your family             | Y         |               |                   |                         |
|      |            |                                                                             | Friend(s)                               | Y         |               |                   |                         |
|      |            |                                                                             | A teacher or other adult at your school | Y         |               |                   |                         |

Note: A \* in the *Matched* or *Year Included* columns indicates that the *Question* or *Label* column contain differences in the \* indicated year or survey version

## OxWell 2021 Secondary

|  |                                                                              |                                                                        |                     |          |               |             |
|--|------------------------------------------------------------------------------|------------------------------------------------------------------------|---------------------|----------|---------------|-------------|
|  |                                                                              | A mental health worker (from outside the school) who visits the school | Y                   |          |               |             |
|  |                                                                              | A doctor, nurse (outside school), psychologist                         | Y                   |          |               |             |
|  |                                                                              | A counsellor, youth worker or social worker                            | Y                   |          |               |             |
|  |                                                                              | Internet advice sites, forums, chatrooms etc                           | Y                   |          |               |             |
|  |                                                                              | No-one                                                                 | Y                   |          |               |             |
|  | <b>Where does the bullying usually happen?</b>                               | The journey to/from school                                             | TOFROMSC            | String   | Prim; Sec; FE | 2019; 2021* |
|  |                                                                              | Online/social media sites                                              | HOOL<br>INTERNET    |          |               |             |
|  |                                                                              | During lessons                                                         | CLASSROOM           |          |               |             |
|  |                                                                              | In school but outside of lessons                                       | M<br>OTHERSCH<br>OL |          |               |             |
|  |                                                                              | At home                                                                | HOME                |          |               |             |
|  |                                                                              | The place you are living now                                           | PLACEMENT           |          |               |             |
|  |                                                                              | Outside                                                                | OUTSIDE             |          |               |             |
|  |                                                                              | Other                                                                  | OTHER               |          |               |             |
|  | <b>What do students in your school do if they see someone being bullied?</b> |                                                                        |                     | Tick box |               | 2021        |
|  |                                                                              | Try to stop the bullying                                               | Y                   |          |               |             |
|  |                                                                              | Tell a teacher                                                         | Y                   |          |               |             |
|  |                                                                              | Laugh                                                                  | Y                   |          |               |             |
|  |                                                                              | Join in                                                                | Y                   |          |               |             |
|  |                                                                              | Nothing                                                                | Y                   |          |               |             |

Note: A \* in the *Matched* or *Year Included* columns indicates that the *Question* or *Label* column contain differences in the \* indicated year or survey version

## OxWell 2021 Secondary

**SELF-HARM**

| CODE | Contingent | Question                                                                                                                               | Label                                                                                                        | Value                                                     | Type          | Matched | Year Included      |
|------|------------|----------------------------------------------------------------------------------------------------------------------------------------|--------------------------------------------------------------------------------------------------------------|-----------------------------------------------------------|---------------|---------|--------------------|
|      |            | <b>Have you ever deliberately self-harmed (for example by taking an overdose or deliberately injuring yourself in some other way)?</b> | Yes<br>No<br>Prefer not to say<br>Not sure what this means                                                   | Y<br>N<br>R<br>D                                          | String        | Sec; FE | 2019*, 2020, 2021* |
|      |            | <b>Have you ever deliberately injured yourself in some way?</b>                                                                        | Never<br>Once or twice<br>A few times<br>Weekly<br>Daily                                                     | 0-12.5<br>12.6-37.5<br>37.6-62.4<br>62.5-87.4<br>87.5-100 | Sliding scale | Sec; FE | 2019, 2020, 2021   |
|      |            | <b>How old were you when you first self-harmed?</b>                                                                                    | Age in years                                                                                                 | 5 - 16                                                    | Numeric       | Sec; FE | 2019, 2020, 2021   |
|      |            | <b>When did you last self-harm?</b>                                                                                                    | In the last week<br>In the last month<br>in the past 3-6 months<br>6 months to a year ago<br>Over a year ago | 0-12.5<br>12.6-37.5<br>37.6-62.4<br>62.5-87.4<br>87.5-100 | Sliding scale | Sec; FE | 2019, 2020, 2021   |
|      |            | <b>How old were you when you last self-harmed?</b>                                                                                     | Age in years                                                                                                 | 5 - 16                                                    | Numeric       | Sec; FE | 2019, 2020, 2021   |
|      |            | <b>Have you ever deliberately taken an overdose (e.g. of pills or other medication)?</b>                                               | No<br>Yes - Once<br>Yes - On more than one occasion                                                          | N<br>YONCE<br>YMORE                                       | String        | Sec; FE | 2019, 2020, 2021*  |
|      |            | <b>How old were you when you first overdosed?</b>                                                                                      | Age in years                                                                                                 | 5 - 16                                                    | Numeric       | Sec; FE | 2019, 2020, 2021   |
|      |            | <b>When did you last take an overdose?</b>                                                                                             | In the last week<br>In the last month<br>In the past 3-6 months<br>6 months to a year ago<br>Over a year ago | 0-12.5<br>12.6-37.5<br>37.6-62.4<br>62.5-87.4<br>87.5-100 | Sliding scale | Sec; FE | 2019, 2020, 2021   |
|      |            | <b>The last time this happened, in what way did you self-harm/ overdose?</b>                                                           | Free text box                                                                                                |                                                           | Free text     | Sec; FE | 2019, 2020, 2021   |
|      |            | <b>Have you ever needed any medical treatment for your self-harm injury/overdose from... (Tick all that apply)</b>                     | My own first-aid<br>Family-provided first-aid<br>School nurse/first-aid at school                            | Y<br>Y<br>Y                                               | Tick box      | Sec; FE | 2019, 2020, 2021   |

Note: A \* in the Matched or Year Included columns indicates that the Question or Label column contain differences in the \* indicated year or survey version



## OxWell 2021 Secondary

|  |                                                                                                                 |                                                                                    |   |               |         |            |
|--|-----------------------------------------------------------------------------------------------------------------|------------------------------------------------------------------------------------|---|---------------|---------|------------|
|  |                                                                                                                 | <i>Friends helped me</i>                                                           | Y |               |         |            |
|  |                                                                                                                 | <i>GP (family doctor)</i>                                                          | Y |               |         |            |
|  |                                                                                                                 | <i>Ambulance/paramedics</i>                                                        | Y |               |         |            |
|  |                                                                                                                 | <i>Hospital A&amp;E / acute mental health provision</i>                            | Y |               |         |            |
|  |                                                                                                                 | <i>Hospital with overnight stay on ward</i>                                        | Y |               |         |            |
|  |                                                                                                                 | <i>Other</i>                                                                       | Y |               |         |            |
|  | <b>Is there any support you would have liked to have accessed, or people you wish you could have talked to?</b> |                                                                                    |   | Tick box      | Sec; FE | 2021       |
|  |                                                                                                                 | <i>Parent, step-parent or carer</i>                                                | Y |               |         |            |
|  |                                                                                                                 | <i>Brother or sister</i>                                                           | Y |               |         |            |
|  |                                                                                                                 | <i>Someone else in your family</i>                                                 | Y |               |         |            |
|  |                                                                                                                 | <i>Friend(s)</i>                                                                   | Y |               |         |            |
|  |                                                                                                                 | <i>GP (family doctor)</i>                                                          | Y |               |         |            |
|  |                                                                                                                 | <i>Social Worker</i>                                                               | Y |               |         |            |
|  |                                                                                                                 | <i>School Nurse/welfare staff</i>                                                  | Y |               |         |            |
|  |                                                                                                                 | <i>Another adult at school</i>                                                     | Y |               |         |            |
|  |                                                                                                                 | <i>A peer mentor at school</i>                                                     | Y |               |         |            |
|  |                                                                                                                 | <i>CAMHS</i>                                                                       | Y |               |         |            |
|  |                                                                                                                 | <i>Support service given by charity</i>                                            | Y |               |         |            |
|  |                                                                                                                 | <i>An adult outside of school (at a sport club, another parent, family friend)</i> | Y |               |         |            |
|  |                                                                                                                 | <i>A telephone/text help-line</i>                                                  | Y |               |         |            |
|  |                                                                                                                 | <i>Website or online forum</i>                                                     | Y |               |         |            |
|  |                                                                                                                 | <i>Other</i>                                                                       | Y |               |         |            |
|  |                                                                                                                 | <i>Please enter:</i>                                                               |   | Free text box |         |            |
|  |                                                                                                                 | <i>None of these</i>                                                               | Y |               |         |            |
|  | <b>Is there anything that prevented you from accessing support for your self-harm?</b>                          |                                                                                    |   | Tick box      | Sec; FE | 2019, 2020 |
|  |                                                                                                                 | <i>Didn't know who to ask</i>                                                      | Y |               |         |            |

Note: A \* in the *Matched* or *Year Included* columns indicates that the *Question* or *Label* column contain differences in the \* indicated year or survey version



## OxWell 2021 Secondary

|  |                                                                               |                                                  |                |               |         |      |  |
|--|-------------------------------------------------------------------------------|--------------------------------------------------|----------------|---------------|---------|------|--|
|  |                                                                               | <i>I wanted to get some attention</i>            | Y              |               |         |      |  |
|  |                                                                               | <i>I am not sure why I did it</i>                | Y              |               |         |      |  |
|  | <b>Have you ever asked for support for your self-harm from the following?</b> |                                                  |                |               |         |      |  |
|  | <b>Parent, step-parent or carer</b>                                           |                                                  | Y              |               |         |      |  |
|  | <b>Regarding this support, are you</b>                                        | <i>Currently being offered support</i>           | CURRENTSUPPORT | String        | Sec; Fe | 2021 |  |
|  |                                                                               | <i>Previously been offered support</i>           | PREVSUPPORT    |               |         |      |  |
|  |                                                                               | <i>Not been offered support/been turned away</i> | NOSUPPORT      |               |         |      |  |
|  | <b>Regarding this support, was it helpful?</b>                                | <i>Changed mind before getting the support</i>   | CHANGEDMIND    |               |         |      |  |
|  |                                                                               | <i>Not helpful at all</i>                        | 0-12.5         | Sliding scale | Sec; Fe | 2021 |  |
|  |                                                                               | <i>Not helpful enough</i>                        | 12.6-37.5      |               |         |      |  |
|  |                                                                               | <i>Just about helpful enough</i>                 | 37.6-62.4      |               |         |      |  |
|  |                                                                               | <i>Quite helpful</i>                             | 62.5-87.4      |               |         |      |  |
|  |                                                                               | <i>Very helpful</i>                              | 87.5-100       |               |         |      |  |
|  | <b>Brother or sister</b>                                                      |                                                  | Y              |               |         |      |  |
|  | <b>Regarding this support, are you</b>                                        | <i>Currently being offered support</i>           | CURRENTSUPPORT | String        | Sec; Fe | 2021 |  |
|  |                                                                               | <i>Previously been offered support</i>           | PREVSUPPORT    |               |         |      |  |
|  |                                                                               | <i>Not been offered support/been turned away</i> | NOSUPPORT      |               |         |      |  |
|  | <b>Regarding this support, was it helpful?</b>                                | <i>Changed mind before getting the support</i>   | CHANGEDMIND    |               |         |      |  |
|  |                                                                               | <i>Not helpful at all</i>                        | 0-12.5         | Sliding scale | Sec; Fe | 2021 |  |
|  |                                                                               | <i>Not helpful enough</i>                        | 12.6-37.5      |               |         |      |  |
|  |                                                                               | <i>Just about helpful enough</i>                 | 37.6-62.4      |               |         |      |  |
|  |                                                                               | <i>Quite helpful</i>                             | 62.5-87.4      |               |         |      |  |
|  |                                                                               | <i>Very helpful</i>                              | 87.5-100       |               |         |      |  |
|  | <b>Someone else in your family</b>                                            |                                                  | Y              |               |         |      |  |
|  | <b>Regarding this support, are you</b>                                        | <i>Currently being offered support</i>           | CURRENTSUPPORT | String        | Sec; Fe | 2021 |  |
|  |                                                                               | <i>Previously been offered support</i>           | PREVSUPPORT    |               |         |      |  |
|  |                                                                               | <i>Not been offered support/been turned away</i> | NOSUPPORT      |               |         |      |  |
|  | <b>Regarding this support, was it helpful?</b>                                | <i>Changed mind before getting the support</i>   | CHANGEDMIND    |               |         |      |  |
|  |                                                                               | <i>Not helpful at all</i>                        | 0-12.5         | Sliding scale | Sec; Fe | 2021 |  |
|  |                                                                               | <i>Not helpful enough</i>                        | 12.6-37.5      |               |         |      |  |

Note: A \* in the *Matched* or *Year Included* columns indicates that the *Question* or *Label* column contain differences in the \* indicated year or survey version

## OxWell 2021 Secondary

|  |                                                |                                                  |                |               |         |      |
|--|------------------------------------------------|--------------------------------------------------|----------------|---------------|---------|------|
|  |                                                | <i>Just about helpful enough</i>                 | 37.6-62.4      |               |         |      |
|  |                                                | <i>Quite helpful</i>                             | 62.5-87.4      |               |         |      |
|  |                                                | <i>Very helpful</i>                              | 87.5-100       |               |         |      |
|  | <b>Friend(s)</b>                               |                                                  |                |               |         |      |
|  | <b>Regarding this support, are you</b>         | <i>Currently being offered support</i>           | CURRENTSUPPORT | String        | Sec; Fe | 2021 |
|  |                                                | <i>Previously been offered support</i>           | PREVSUPPORT    |               |         |      |
|  |                                                | <i>Not been offered support/been turned away</i> | NOSUPPORT      |               |         |      |
|  | <b>Regarding this support, was it helpful?</b> | <i>Changed mind before getting the support</i>   | CHANGEDMIND    |               |         |      |
|  |                                                | <i>Not helpful at all</i>                        | 0-12.5         | Sliding scale | Sec; Fe | 2021 |
|  |                                                | <i>Not helpful enough</i>                        | 12.6-37.5      |               |         |      |
|  |                                                | <i>Just about helpful enough</i>                 | 37.6-62.4      |               |         |      |
|  |                                                | <i>Quite helpful</i>                             | 62.5-87.4      |               |         |      |
|  |                                                | <i>Very helpful</i>                              | 87.5-100       |               |         |      |
|  | <b>GP (family doctor)</b>                      |                                                  |                |               |         |      |
|  | <b>Regarding this support, are you</b>         | <i>Currently being offered support</i>           | CURRENTSUPPORT | String        | Sec; Fe | 2021 |
|  |                                                | <i>Previously been offered support</i>           | PREVSUPPORT    |               |         |      |
|  |                                                | <i>Not been offered support/been turned away</i> | NOSUPPORT      |               |         |      |
|  | <b>Regarding this support, was it helpful?</b> | <i>Changed mind before getting the support</i>   | CHANGEDMIND    |               |         |      |
|  |                                                | <i>Not helpful at all</i>                        | 0-12.5         | Sliding scale | Sec; Fe | 2021 |
|  |                                                | <i>Not helpful enough</i>                        | 12.6-37.5      |               |         |      |
|  |                                                | <i>Just about helpful enough</i>                 | 37.6-62.4      |               |         |      |
|  |                                                | <i>Quite helpful</i>                             | 62.5-87.4      |               |         |      |
|  |                                                | <i>Very helpful</i>                              | 87.5-100       |               |         |      |
|  | <b>Social Worker</b>                           |                                                  |                |               |         |      |
|  | <b>Regarding this support, are you</b>         | <i>Currently being offered support</i>           | CURRENTSUPPORT | String        | Sec; Fe | 2021 |
|  |                                                | <i>Previously been offered support</i>           | PREVSUPPORT    |               |         |      |
|  |                                                | <i>Not been offered support/been turned away</i> | NOSUPPORT      |               |         |      |
|  | <b>Regarding this support, was it helpful?</b> | <i>Changed mind before getting the support</i>   | CHANGEDMIND    |               |         |      |
|  |                                                | <i>Not helpful at all</i>                        | 0-12.5         | Sliding scale | Sec; Fe | 2021 |
|  |                                                | <i>Not helpful enough</i>                        | 12.6-37.5      |               |         |      |
|  |                                                | <i>Just about helpful enough</i>                 | 37.6-62.4      |               |         |      |

Note: A \* in the *Matched* or *Year Included* columns indicates that the *Question* or *Label* column contain differences in the \* indicated year or survey version

## OxWell 2021 Secondary

|  |                                                                                                      |                                                  |                |               |         |      |
|--|------------------------------------------------------------------------------------------------------|--------------------------------------------------|----------------|---------------|---------|------|
|  |                                                                                                      | <i>Quite helpful</i>                             | 62.5-87.4      |               |         |      |
|  |                                                                                                      | <i>Very helpful</i>                              | 87.5-100       |               |         |      |
|  | <b>School Nurse/Counsellor/Educational Mental health practitioner/other pastoral staff at school</b> |                                                  | Y              |               |         |      |
|  | <b>Regarding this support, are you</b>                                                               | <i>Currently being offered support</i>           | CURRENTSUPPORT | String        | Sec; Fe | 2021 |
|  |                                                                                                      | <i>Previously been offered support</i>           | PREVSUPPORT    |               |         |      |
|  |                                                                                                      | <i>Not been offered support/been turned away</i> | NOSUPPORT      |               |         |      |
|  | <b>Regarding this support, was it helpful?</b>                                                       | <i>Changed mind before getting the support</i>   | CHANGEDMIND    |               |         |      |
|  |                                                                                                      | <i>Not helpful at all</i>                        | 0-12.5         | Sliding scale | Sec; Fe | 2021 |
|  |                                                                                                      | <i>Not helpful enough</i>                        | 12.6-37.5      |               |         |      |
|  |                                                                                                      | <i>Just about helpful enough</i>                 | 37.6-62.4      |               |         |      |
|  |                                                                                                      | <i>Quite helpful</i>                             | 62.5-87.4      |               |         |      |
|  |                                                                                                      | <i>Very helpful</i>                              | 87.5-100       |               |         |      |
|  | <b>Another adult at school</b>                                                                       |                                                  | Y              |               |         |      |
|  | <b>Regarding this support, are you</b>                                                               | <i>Currently being offered support</i>           | CURRENTSUPPORT | String        | Sec; Fe | 2021 |
|  |                                                                                                      | <i>Previously been offered support</i>           | PREVSUPPORT    |               |         |      |
|  |                                                                                                      | <i>Not been offered support/been turned away</i> | NOSUPPORT      |               |         |      |
|  | <b>Regarding this support, was it helpful?</b>                                                       | <i>Changed mind before getting the support</i>   | CHANGEDMIND    |               |         |      |
|  |                                                                                                      | <i>Not helpful at all</i>                        | 0-12.5         | Sliding scale | Sec; Fe | 2021 |
|  |                                                                                                      | <i>Not helpful enough</i>                        | 12.6-37.5      |               |         |      |
|  |                                                                                                      | <i>Just about helpful enough</i>                 | 37.6-62.4      |               |         |      |
|  |                                                                                                      | <i>Quite helpful</i>                             | 62.5-87.4      |               |         |      |
|  |                                                                                                      | <i>Very helpful</i>                              | 87.5-100       |               |         |      |
|  | <b>A peer mentor at school</b>                                                                       |                                                  | Y              |               |         |      |
|  | <b>Regarding this support, are you</b>                                                               | <i>Currently being offered support</i>           | CURRENTSUPPORT | String        | Sec; Fe | 2021 |
|  |                                                                                                      | <i>Previously been offered support</i>           | PREVSUPPORT    |               |         |      |
|  |                                                                                                      | <i>Not been offered support/been turned away</i> | NOSUPPORT      |               |         |      |
|  | <b>Regarding this support, was it helpful?</b>                                                       | <i>Changed mind before getting the support</i>   | CHANGEDMIND    |               |         |      |
|  |                                                                                                      | <i>Not helpful at all</i>                        | 0-12.5         | Sliding scale | Sec; Fe | 2021 |
|  |                                                                                                      | <i>Not helpful enough</i>                        | 12.6-37.5      |               |         |      |
|  |                                                                                                      | <i>Just about helpful enough</i>                 | 37.6-62.4      |               |         |      |
|  |                                                                                                      | <i>Quite helpful</i>                             | 62.5-87.4      |               |         |      |

Note: A \* in the *Matched* or *Year Included* columns indicates that the *Question* or *Label* column contain differences in the \* indicated year or survey version

## OxWell 2021 Secondary

|  |                                                                                    | Very helpful                                     | 87.5-100       |               |         |      |
|--|------------------------------------------------------------------------------------|--------------------------------------------------|----------------|---------------|---------|------|
|  | <b>CAMHS (NHS Child and adolescent mental health services)</b>                     |                                                  | Y              |               |         |      |
|  | <b>Regarding this support, are you</b>                                             | <i>Currently being offered support</i>           | CURRENTSUPPORT | String        | Sec; Fe | 2021 |
|  |                                                                                    | <i>Previously been offered support</i>           | PREVSUPPORT    |               |         |      |
|  |                                                                                    | <i>Not been offered support/been turned away</i> | NOSUPPORT      |               |         |      |
|  | <b>Regarding this support, was it helpful?</b>                                     | <i>Changed mind before getting the support</i>   | CHANGEDMIND    |               |         |      |
|  |                                                                                    | <i>Not helpful at all</i>                        | 0-12.5         | Sliding scale | Sec; Fe | 2021 |
|  |                                                                                    | <i>Not helpful enough</i>                        | 12.6-37.5      |               |         |      |
|  |                                                                                    | <i>Just about helpful enough</i>                 | 37.6-62.4      |               |         |      |
|  |                                                                                    | <i>Quite helpful</i>                             | 62.5-87.4      |               |         |      |
|  |                                                                                    | <i>Very helpful</i>                              | 87.5-100       |               |         |      |
|  | <b>Support service given by charity</b>                                            |                                                  | Y              |               |         |      |
|  | <b>Regarding this support, are you</b>                                             | <i>Currently being offered support</i>           | CURRENTSUPPORT | String        | Sec; Fe | 2021 |
|  |                                                                                    | <i>Previously been offered support</i>           | PREVSUPPORT    |               |         |      |
|  |                                                                                    | <i>Not been offered support/been turned away</i> | NOSUPPORT      |               |         |      |
|  | <b>Regarding this support, was it helpful?</b>                                     | <i>Changed mind before getting the support</i>   | CHANGEDMIND    |               |         |      |
|  |                                                                                    | <i>Not helpful at all</i>                        | 0-12.5         | Sliding scale | Sec; Fe | 2021 |
|  |                                                                                    | <i>Not helpful enough</i>                        | 12.6-37.5      |               |         |      |
|  |                                                                                    | <i>Just about helpful enough</i>                 | 37.6-62.4      |               |         |      |
|  |                                                                                    | <i>Quite helpful</i>                             | 62.5-87.4      |               |         |      |
|  |                                                                                    | <i>Very helpful</i>                              | 87.5-100       |               |         |      |
|  | <b>An adult outside of school (at a sport club, another parent, family friend)</b> |                                                  | Y              |               |         |      |
|  | <b>Regarding this support, are you</b>                                             | <i>Currently being offered support</i>           | CURRENTSUPPORT | String        | Sec; Fe | 2021 |
|  |                                                                                    | <i>Previously been offered support</i>           | PREVSUPPORT    |               |         |      |
|  |                                                                                    | <i>Not been offered support/been turned away</i> | NOSUPPORT      |               |         |      |
|  | <b>Regarding this support, was it helpful?</b>                                     | <i>Changed mind before getting the support</i>   | CHANGEDMIND    |               |         |      |
|  |                                                                                    | <i>Not helpful at all</i>                        | 0-12.5         | Sliding scale | Sec; Fe | 2021 |
|  |                                                                                    | <i>Not helpful enough</i>                        | 12.6-37.5      |               |         |      |
|  |                                                                                    | <i>Just about helpful enough</i>                 | 37.6-62.4      |               |         |      |
|  |                                                                                    | <i>Quite helpful</i>                             | 62.5-87.4      |               |         |      |
|  |                                                                                    | <i>Very helpful</i>                              | 87.5-100       |               |         |      |

Note: A \* in the *Matched* or *Year Included* columns indicates that the *Question* or *Label* column contain differences in the \* indicated year or survey version

## OxWell 2021 Secondary

|                                                  |                                                |                                                  |                                  |               |         |      |
|--------------------------------------------------|------------------------------------------------|--------------------------------------------------|----------------------------------|---------------|---------|------|
|                                                  | <b>A telephone/text helpline</b>               |                                                  |                                  |               |         |      |
|                                                  | <b>Regarding this support, are you</b>         | <i>Currently being offered support</i>           | CURRENTS                         | String        | Sec; Fe | 2021 |
|                                                  | <b>Regarding this support, was it helpful?</b> | <i>Previously been offered support</i>           | UPPORT                           | Sliding scale | Sec; Fe | 2021 |
|                                                  |                                                | <i>Not been offered support/been turned away</i> | PREVSUPP<br>ORT<br>NOSUPPOR<br>T |               |         |      |
|                                                  |                                                | <i>Changed mind before getting the support</i>   | CHANGEDMI<br>ND                  |               |         |      |
|                                                  |                                                | <i>Not helpful at all</i>                        | 0-12.5                           |               |         |      |
|                                                  |                                                | <i>Not helpful enough</i>                        | 12.6-37.5                        |               |         |      |
|                                                  |                                                | <i>Just about helpful enough</i>                 | 37.6-62.4                        |               |         |      |
|                                                  | <b>Website or online forum</b>                 |                                                  |                                  |               |         |      |
|                                                  | <b>Regarding this support, are you</b>         | <i>Currently being offered support</i>           | Y<br>CURRENTS                    | String        | Sec; Fe | 2021 |
|                                                  | <b>Regarding this support, was it helpful?</b> | <i>Previously been offered support</i>           | UPPORT                           | Sliding scale | Sec; Fe | 2021 |
|                                                  |                                                | <i>Not been offered support/been turned away</i> | PREVSUPP<br>ORT<br>NOSUPPOR<br>T |               |         |      |
|                                                  |                                                | <i>Changed mind before getting the support</i>   | CHANGEDMI<br>ND                  |               |         |      |
|                                                  |                                                | <i>Not helpful at all</i>                        | 0-12.5                           |               |         |      |
|                                                  |                                                | <i>Not helpful enough</i>                        | 12.6-37.5                        |               |         |      |
|                                                  |                                                | <i>Just about helpful enough</i>                 | 37.6-62.4                        |               |         |      |
|                                                  | <b>Other</b>                                   |                                                  |                                  |               |         |      |
|                                                  | <b>Please enter</b>                            |                                                  | Y                                | Free text box |         |      |
|                                                  | <b>Regarding this support, are you</b>         | <i>Currently being offered support</i>           | CURRENTS                         | String        | Sec; Fe | 2021 |
|                                                  | <b>Regarding this support, was it helpful?</b> | <i>Previously been offered support</i>           | UPPORT                           | Sliding scale | Sec; Fe | 2021 |
| <i>Not been offered support/been turned away</i> | PREVSUPP<br>ORT<br>NOSUPPOR<br>T               |                                                  |                                  |               |         |      |
| <i>Changed mind before getting the support</i>   | CHANGEDMI<br>ND                                |                                                  |                                  |               |         |      |
| <i>Not helpful at all</i>                        | 0-12.5                                         |                                                  |                                  |               |         |      |
| <i>Not helpful enough</i>                        | 12.6-37.5                                      |                                                  |                                  |               |         |      |
| <i>Just about helpful enough</i>                 | 37.6-62.4                                      |                                                  |                                  |               |         |      |
|                                                  | <b>None of these</b>                           |                                                  | Y                                |               |         |      |

Note: A \* in the *Matched* or *Year Included* columns indicates that the *Question* or *Label* column contain differences in the \* indicated year or survey version

## OxWell 2021 Secondary

|  |                                                                                                                      |                                                                                                                                                                     |                                                           |               |         |                  |
|--|----------------------------------------------------------------------------------------------------------------------|---------------------------------------------------------------------------------------------------------------------------------------------------------------------|-----------------------------------------------------------|---------------|---------|------------------|
|  | <b>Have you ever come across any content related to self-harm online?</b>                                            | <i>Never</i><br><i>Once or twice</i><br><i>A few times</i><br><i>Weekly</i><br><i>Daily</i>                                                                         | 0-12.5<br>12.6-37.5<br>37.6-62.4<br>62.5-87.4<br>87.5-100 | String        | Sec; FE | 2019, 2020, 2021 |
|  | <b>Have you ever seriously thought about taking an overdose or trying to harm yourself but not actually done so?</b> | <i>No</i><br><i>Yes – last time was within the past month</i><br><i>Yes – last time was within the past year</i><br><i>Yes – last time was more than a year ago</i> | NO<br>WITHINMNT<br>H<br>WITHINYR<br>GTYR                  | String        | Sec; FE | 2019,2021        |
|  | <b>Have you ever told someone you were going to harm or kill yourself?</b>                                           | <i>Never</i><br><i>Rarely</i><br><i>Occasionally</i><br><i>Frequently</i><br><i>Always</i>                                                                          | 0-12.5<br>12.6-37.5<br>37.6-62.4<br>62.5-87.4<br>87.5-100 | Sliding scale | Sec; FE | 2019, 2020, 2021 |

Note: A \* in the *Matched* or *Year Included* columns indicates that the *Question* or *Label* column contain differences in the \* indicated year or survey version



OxWell 2021 Secondary  
**MENTAL HEALTH**

| CODE | Contingent              | Question                                                    | Label                   | Value  | Type          | Matched           | Year Included       |
|------|-------------------------|-------------------------------------------------------------|-------------------------|--------|---------------|-------------------|---------------------|
|      |                         | <b><i>I've been feeling optimistic about the future</i></b> | <i>None of the time</i> | 0-12.5 | Sliding scale | Prim*;<br>Sec; FE | 2019; 2020;<br>2021 |
|      | <i>Rarely</i>           |                                                             | 12.6-37.5               |        |               |                   |                     |
|      | <i>Some of the time</i> |                                                             | 37.6-62.4               |        |               |                   |                     |
|      | <i>Often</i>            |                                                             | 62.5-87.4               |        |               |                   |                     |
|      | <i>All of the time</i>  |                                                             | 87.5-100                |        |               |                   |                     |
|      |                         | <b><i>I've been feeling useful</i></b>                      | <i>None of the time</i> | 0-12.5 | Sliding scale | Prim; Sec;<br>FE  | 2019; 2020;<br>2021 |
|      | <i>Rarely</i>           |                                                             | 12.6-37.5               |        |               |                   |                     |
|      | <i>Some of the time</i> |                                                             | 37.6-62.4               |        |               |                   |                     |
|      | <i>Often</i>            |                                                             | 62.5-87.4               |        |               |                   |                     |
|      | <i>All of the time</i>  |                                                             | 87.5-100                |        |               |                   |                     |
|      |                         | <b><i>I've been feeling relaxed</i></b>                     | <i>None of the time</i> | 0-12.5 | Sliding scale | Prim; Sec;<br>FE  | 2019; 2020;<br>2021 |
|      | <i>Rarely</i>           |                                                             | 12.6-37.5               |        |               |                   |                     |
|      | <i>Some of the time</i> |                                                             | 37.6-62.4               |        |               |                   |                     |
|      | <i>Often</i>            |                                                             | 62.5-87.4               |        |               |                   |                     |
|      | <i>All of the time</i>  |                                                             | 87.5-100                |        |               |                   |                     |
|      |                         | <b><i>I've been feeling interested in other people</i></b>  | <i>None of the time</i> | 0-12.5 | Sliding scale | Prim; Sec;<br>FE  | 2019; 2020;<br>2021 |
|      | <i>Rarely</i>           |                                                             | 12.6-37.5               |        |               |                   |                     |
|      | <i>Some of the time</i> |                                                             | 37.6-62.4               |        |               |                   |                     |
|      | <i>Often</i>            |                                                             | 62.5-87.4               |        |               |                   |                     |
|      | <i>All of the time</i>  |                                                             | 87.5-100                |        |               |                   |                     |
|      |                         | <b><i>I've had energy to spare</i></b>                      | <i>None of the time</i> | 0-12.5 | Sliding scale | Prim; Sec;<br>FE  | 2019; 2020;<br>2021 |
|      | <i>Rarely</i>           |                                                             | 12.6-37.5               |        |               |                   |                     |
|      | <i>Some of the time</i> |                                                             | 37.6-62.4               |        |               |                   |                     |
|      | <i>Often</i>            |                                                             | 62.5-87.4               |        |               |                   |                     |
|      | <i>All of the time</i>  |                                                             | 87.5-100                |        |               |                   |                     |
|      |                         | <b><i>I've been dealing with problems well</i></b>          | <i>None of the time</i> | 0-12.5 | Sliding scale | Prim; Sec;<br>FE  | 2019; 2020;<br>2021 |
|      | <i>Rarely</i>           |                                                             | 12.6-37.5               |        |               |                   |                     |
|      | <i>Some of the time</i> |                                                             | 37.6-62.4               |        |               |                   |                     |
|      | <i>Often</i>            |                                                             | 62.5-87.4               |        |               |                   |                     |
|      | <i>All of the time</i>  |                                                             | 87.5-100                |        |               |                   |                     |
|      |                         | <b><i>I've been thinking clearly</i></b>                    | <i>None of the time</i> | 0-12.5 | Sliding scale | Prim; Sec;<br>FE  | 2019; 2020;<br>2021 |
|      | <i>Rarely</i>           |                                                             | 12.6-37.5               |        |               |                   |                     |
|      | <i>Some of the time</i> |                                                             | 37.6-62.4               |        |               |                   |                     |
|      | <i>Often</i>            |                                                             | 62.5-87.4               |        |               |                   |                     |
|      |                         |                                                             |                         |        |               |                   |                     |

Note: A \* in the *Matched* or *Year Included* columns indicates that the *Question* or *Label* column contain differences in the \* indicated year or survey version

## OxWell 2021 Secondary

|  |                                                                  |                         |           |               |                  |                     |
|--|------------------------------------------------------------------|-------------------------|-----------|---------------|------------------|---------------------|
|  |                                                                  | <i>All of the time</i>  | 87.5-100  |               |                  |                     |
|  | <b><i>I've been feeling good about myself</i></b>                | <i>None of the time</i> | 0-12.5    | Sliding scale | Prim; Sec;<br>FE | 2019; 2020;<br>2021 |
|  |                                                                  | <i>Rarely</i>           | 12.6-37.5 |               |                  |                     |
|  |                                                                  | <i>Some of the time</i> | 37.6-62.4 |               |                  |                     |
|  |                                                                  | <i>Often</i>            | 62.5-87.4 |               |                  |                     |
|  |                                                                  | <i>All of the time</i>  | 87.5-100  |               |                  |                     |
|  | <b><i>I've been feeling confident</i></b>                        | <i>None of the time</i> | 0-12.5    | Sliding scale | Prim; Sec;<br>FE | 2019; 2020;<br>2021 |
|  |                                                                  | <i>Rarely</i>           | 12.6-37.5 |               |                  |                     |
|  |                                                                  | <i>Some of the time</i> | 37.6-62.4 |               |                  |                     |
|  |                                                                  | <i>Often</i>            | 62.5-87.4 |               |                  |                     |
|  |                                                                  | <i>All of the time</i>  | 87.5-100  |               |                  |                     |
|  | <b><i>I've been able to make my own mind up about things</i></b> | <i>None of the time</i> | 0-12.5    | Sliding scale | Prim; Sec;<br>FE | 2019; 2020;<br>2021 |
|  |                                                                  | <i>Rarely</i>           | 12.6-37.5 |               |                  |                     |
|  |                                                                  | <i>Some of the time</i> | 37.6-62.4 |               |                  |                     |
|  |                                                                  | <i>Often</i>            | 62.5-87.4 |               |                  |                     |
|  |                                                                  | <i>All of the time</i>  | 87.5-100  |               |                  |                     |
|  | <b><i>I've been feeling loved</i></b>                            | <i>None of the time</i> | 0-12.5    | Sliding scale | Prim; Sec;<br>FE | 2019; 2020;<br>2021 |
|  |                                                                  | <i>Rarely</i>           | 12.6-37.5 |               |                  |                     |
|  |                                                                  | <i>Some of the time</i> | 37.6-62.4 |               |                  |                     |
|  |                                                                  | <i>Often</i>            | 62.5-87.4 |               |                  |                     |
|  |                                                                  | <i>All of the time</i>  | 87.5-100  |               |                  |                     |
|  | <b><i>I've been interested in new things</i></b>                 | <i>None of the time</i> | 0-12.5    | Sliding scale | Prim; Sec;<br>FE | 2019; 2020;<br>2021 |
|  |                                                                  | <i>Rarely</i>           | 12.6-37.5 |               |                  |                     |
|  |                                                                  | <i>Some of the time</i> | 37.6-62.4 |               |                  |                     |
|  |                                                                  | <i>Often</i>            | 62.5-87.4 |               |                  |                     |
|  |                                                                  | <i>All of the time</i>  | 87.5-100  |               |                  |                     |
|  | <b><i>I've been feeling cheerful</i></b>                         | <i>None of the time</i> | 0-12.5    | Sliding scale | Prim; Sec;<br>FE | 2019; 2020;<br>2021 |
|  |                                                                  | <i>Rarely</i>           | 12.6-37.5 |               |                  |                     |
|  |                                                                  | <i>Some of the time</i> | 37.6-62.4 |               |                  |                     |
|  |                                                                  | <i>Often</i>            | 62.5-87.4 |               |                  |                     |
|  |                                                                  | <i>All of the time</i>  | 87.5-100  |               |                  |                     |
|  | <b><i>I've been feeling close to other people</i></b>            | <i>None of the time</i> | 0-12.5    | Sliding scale | Prim; Sec;<br>FE | 2019; 2020;<br>2021 |
|  |                                                                  | <i>Rarely</i>           | 12.6-37.5 |               |                  |                     |
|  |                                                                  | <i>Some of the time</i> | 37.6-62.4 |               |                  |                     |
|  |                                                                  | <i>Often</i>            | 62.5-87.4 |               |                  |                     |
|  |                                                                  | <i>All of the time</i>  | 87.5-100  |               |                  |                     |

Note: A \* in the *Matched* or *Year Included* columns indicates that the *Question* or *Label* column contain differences in the \* indicated year or survey version

## OxWell 2021 Secondary

|  |                                                                                                                   |                                                                   |                                       |        |         |            |
|--|-------------------------------------------------------------------------------------------------------------------|-------------------------------------------------------------------|---------------------------------------|--------|---------|------------|
|  | <b><i>I feel sad or empty</i></b>                                                                                 | <i>Never</i><br><i>Sometimes</i><br><i>Often</i><br><i>Always</i> | NEVER<br>SOMETIMES<br>OFTEN<br>ALWAYS | String | Sec; FE | 2020; 2021 |
|  | <b><i>I worry when I think I have done poorly at something</i></b>                                                | <i>Never</i><br><i>Sometimes</i><br><i>Often</i><br><i>Always</i> | NEVER<br>SOMETIMES<br>OFTEN<br>ALWAYS | String | Sec; FE | 2020; 2021 |
|  | <b><i>I would feel afraid of being on my own at home</i></b>                                                      | <i>Never</i><br><i>Sometimes</i><br><i>Often</i><br><i>Always</i> | NEVER<br>SOMETIMES<br>OFTEN<br>ALWAYS | String | Sec; FE | 2020; 2021 |
|  | <b><i>Nothing is much fun anymore</i></b>                                                                         | <i>Never</i><br><i>Sometimes</i><br><i>Often</i><br><i>Always</i> | NEVER<br>SOMETIMES<br>OFTEN<br>ALWAYS | String | Sec; FE | 2020; 2021 |
|  | <b><i>I worry that something awful will happen to someone in my family</i></b>                                    | <i>Never</i><br><i>Sometimes</i><br><i>Often</i><br><i>Always</i> | NEVER<br>SOMETIMES<br>OFTEN<br>ALWAYS | String | Sec; FE | 2020; 2021 |
|  | <b><i>I am afraid of being in crowded places (like shopping centres, the movies, buses, busy playgrounds)</i></b> | <i>Never</i><br><i>Sometimes</i><br><i>Often</i><br><i>Always</i> | NEVER<br>SOMETIMES<br>OFTEN<br>ALWAYS | String | Sec; FE | 2020; 2021 |
|  | <b><i>I worry what other people think of me</i></b>                                                               | <i>Never</i><br><i>Sometimes</i><br><i>Often</i><br><i>Always</i> | NEVER<br>SOMETIMES<br>OFTEN<br>ALWAYS | String | Sec; FE | 2020; 2021 |
|  | <b><i>I have trouble sleeping</i></b>                                                                             | <i>Never</i><br><i>Sometimes</i><br><i>Often</i><br><i>Always</i> | NEVER<br>SOMETIMES<br>OFTEN<br>ALWAYS | String | Sec; FE | 2020; 2021 |
|  | <b><i>I feel scared if I have to sleep on my own</i></b>                                                          | <i>Never</i><br><i>Sometimes</i>                                  | NEVER<br>SOMETIMES                    | String | Sec; FE | 2020; 2021 |

Note: A \* in the *Matched* or *Year Included* columns indicates that the *Question* or *Label* column contain differences in the \* indicated year or survey version

## OxWell 2021 Secondary

|  |                                                                                                                                   |                                                                   |                                       |        |         |            |
|--|-----------------------------------------------------------------------------------------------------------------------------------|-------------------------------------------------------------------|---------------------------------------|--------|---------|------------|
|  |                                                                                                                                   | <i>Often</i><br><i>Always</i>                                     | OFTEN<br>ALWAYS                       |        |         |            |
|  | <b><i>I have problems with my appetite</i></b>                                                                                    | <i>Never</i><br><i>Sometimes</i><br><i>Often</i><br><i>Always</i> | NEVER<br>SOMETIMES<br>OFTEN<br>ALWAYS | String | Sec; FE | 2020; 2021 |
|  | <b><i>I suddenly become dizzy or faint when there is no reason for this</i></b>                                                   | <i>Never</i><br><i>Sometimes</i><br><i>Often</i><br><i>Always</i> | NEVER<br>SOMETIMES<br>OFTEN<br>ALWAYS | String | Sec; FE | 2020; 2021 |
|  | <b><i>I have to do some things over and over again (like washing my hands, cleaning or putting things in a certain order)</i></b> | <i>Never</i><br><i>Sometimes</i><br><i>Often</i><br><i>Always</i> | NEVER<br>SOMETIMES<br>OFTEN<br>ALWAYS | String | Sec; FE | 2020; 2021 |
|  | <b><i>I have no energy for things</i></b>                                                                                         | <i>Never</i><br><i>Sometimes</i><br><i>Often</i><br><i>Always</i> | NEVER<br>SOMETIMES<br>OFTEN<br>ALWAYS | String | Sec; FE | 2020; 2021 |
|  | <b><i>I suddenly start to tremble or shake when there is no reason for this</i></b>                                               | <i>Never</i><br><i>Sometimes</i><br><i>Often</i><br><i>Always</i> | NEVER<br>SOMETIMES<br>OFTEN<br>ALWAYS | String | Sec; FE | 2020; 2021 |
|  | <b><i>I cannot think clearly</i></b>                                                                                              | <i>Never</i><br><i>Sometimes</i><br><i>Often</i><br><i>Always</i> | NEVER<br>SOMETIMES<br>OFTEN<br>ALWAYS | String | Sec; FE | 2020; 2021 |
|  | <b><i>I feel worthless</i></b>                                                                                                    | <i>Never</i><br><i>Sometimes</i><br><i>Often</i><br><i>Always</i> | NEVER<br>SOMETIMES<br>OFTEN<br>ALWAYS | String | Sec; FE | 2020; 2021 |
|  | <b><i>I have to think of special thoughts (like numbers or words) to stop bad things from happening.</i></b>                      | <i>Never</i><br><i>Sometimes</i><br><i>Often</i><br><i>Always</i> | NEVER<br>SOMETIMES<br>OFTEN<br>ALWAYS | String | Sec; FE | 2020; 2021 |

Note: A \* in the *Matched* or *Year Included* columns indicates that the *Question* or *Label* column contain differences in the \* indicated year or survey version

## OxWell 2021 Secondary

|  |                                                                                                       |                                                   |                                       |               |               |                  |
|--|-------------------------------------------------------------------------------------------------------|---------------------------------------------------|---------------------------------------|---------------|---------------|------------------|
|  | <b><i>I think about death</i></b>                                                                     | Never<br>Sometimes<br>Often<br>Always             | NEVER<br>SOMETIMES<br>OFTEN<br>ALWAYS | String        | Sec; FE       | 2020; 2021       |
|  | <b><i>I feel like I don't want to move</i></b>                                                        | Never<br>Sometimes<br>Often<br>Always             | NEVER<br>SOMETIMES<br>OFTEN<br>ALWAYS | String        | Sec; FE       | 2020; 2021       |
|  | <b><i>I worry that I will suddenly get a scared feeling when there is nothing to be afraid of</i></b> | Never<br>Sometimes<br>Often<br>Always             | NEVER<br>SOMETIMES<br>OFTEN<br>ALWAYS | String        | Sec; FE       | 2020; 2021       |
|  | <b><i>I am tired a lot</i></b>                                                                        | Never<br>Sometimes<br>Often<br>Always             | NEVER<br>SOMETIMES<br>OFTEN<br>ALWAYS | String        | Sec; FE       | 2020; 2021       |
|  | <b><i>I feel afraid that I will make a fool of myself in front of people</i></b>                      | Never<br>Sometimes<br>Often<br>Always             | NEVER<br>SOMETIMES<br>OFTEN<br>ALWAYS | String        | Sec; FE       | 2020; 2021       |
|  | <b><i>I have to do some things in just the right way to stop bad things from happening</i></b>        | Never<br>Sometimes<br>Often<br>Always             | NEVER<br>SOMETIMES<br>OFTEN<br>ALWAYS | String        | Sec; FE       | 2020; 2021       |
|  | <b><i>I feel restless</i></b>                                                                         | Never<br>Sometimes<br>Often<br>Always             | NEVER<br>SOMETIMES<br>OFTEN<br>ALWAYS | String        | Sec; FE       | 2020; 2021       |
|  | <b><i>I worry that something bad will happen to me</i></b>                                            | Never<br>Sometimes<br>Often<br>Always             | NEVER<br>SOMETIMES<br>OFTEN<br>ALWAYS | String        | Sec; FE       | 2020; 2021       |
|  | <b><i>Overall, are you basically satisfied with your life?</i></b>                                    | Unsatisfied most of the time<br>Quite unsatisfied | 0-12.5<br>12.6-37.5                   | Sliding scale | Prim; Sec; FE | 2019; 2020; 2021 |

Note: A \* in the *Matched* or *Year Included* columns indicates that the *Question* or *Label* column contain differences in the \* indicated year or survey version

## OxWell 2021 Secondary

|  |                                                                                       |                                          |           |               |                |                  |
|--|---------------------------------------------------------------------------------------|------------------------------------------|-----------|---------------|----------------|------------------|
|  |                                                                                       | <i>Neither satisfied nor unsatisfied</i> | 37.6-62.4 |               |                |                  |
|  |                                                                                       | <i>Quite satisfied</i>                   | 62.5-87.4 |               |                |                  |
|  |                                                                                       | <i>Satisfied</i>                         | 87.5-100  |               |                |                  |
|  | <b>How often have you been so worried about something you can not sleep at night?</b> | <i>Never</i>                             | 0-12.5    | Sliding scale | Prim; Sec; FE  | 2019; 2020; 2021 |
|  |                                                                                       | <i>Once or twice</i>                     | 12.6-37.5 |               |                |                  |
|  |                                                                                       | <i>Sometimes</i>                         | 37.6-62.4 |               |                |                  |
|  |                                                                                       | <i>Most nights</i>                       | 62.5-87.4 |               |                |                  |
|  |                                                                                       | <i>Every night</i>                       | 87.5-100  |               |                |                  |
|  | <b>Overall, how confident about your future do you generally feel?</b>                | Not at all confident                     | 0-12.5    | Sliding scale | Prim ; Sec; FE | 2019;2021        |
|  |                                                                                       | Not very confident                       | 12.6-37.5 |               |                |                  |
|  |                                                                                       | Quite confident                          | 37.6-62.4 |               |                |                  |
|  |                                                                                       | Confident                                | 62.5-87.4 |               |                |                  |
|  |                                                                                       | Extremely confident                      | 87.5-100  |               |                |                  |
|  | <b>How proud do you feel of things you have achieved in your life?</b>                | Not at all                               | 0-12.5    | Sliding scale | Prim ; Sec; FE | 2019; 2021       |
|  |                                                                                       | Not very                                 | 12.6-37.5 |               |                |                  |
|  |                                                                                       | A bit                                    | 37.6-62.4 |               |                |                  |
|  |                                                                                       | Quite                                    | 62.5-87.4 |               |                |                  |
|  |                                                                                       | Extremely                                | 87.5-100  |               |                |                  |

Note: A \* in the *Matched* or *Year Included* columns indicates that the *Question* or *Label* column contain differences in the \* indicated year or survey version

## OxWell 2021 Secondary

**MENTAL HEALTH SERVICES**

| CODE | Contingent | Question                                                                                                                              | Label                                                                                                                                                                                                                                                                                        | Value                                                     | Type          | Matched           | Year Included            |
|------|------------|---------------------------------------------------------------------------------------------------------------------------------------|----------------------------------------------------------------------------------------------------------------------------------------------------------------------------------------------------------------------------------------------------------------------------------------------|-----------------------------------------------------------|---------------|-------------------|--------------------------|
|      |            | <b>Have you ever felt you had a mental health problem</b>                                                                             | Yes<br>No                                                                                                                                                                                                                                                                                    | Y<br>N                                                    | String        | Sec; FE           | 2021                     |
|      |            | <b>Do you know who provides Mental Health support in your school (where to go when you are worried and want to talk to an adult)?</b> | Yes<br>No<br>Not sure                                                                                                                                                                                                                                                                        | Y<br>N<br>D                                               | String        | Prim*;<br>Sec; FE | 2019*;<br>2020;<br>2021* |
|      |            | <b>Who provides mental health support in your school?</b>                                                                             | Education Mental Health Practitioner (EMHP)<br>School nurse<br>Other mental health workers who visit the school (for example, a charity)<br>School counsellor/psychologist<br>Class teacher/lecturer<br>Head of year<br>Teaching assistants<br>SENCO<br>Peer mentor<br>Other adult in school | Y<br>Y<br>Y<br>Y<br>Y<br>Y<br>Y<br>Y<br>Y<br>Y            | Tick box      | Prim*;<br>Sec; FE | 2021                     |
|      |            | <b>Is it easy to access mental health support at school</b>                                                                           | Very difficult<br>Quite difficult<br>Sometimes difficult<br>Quite easy<br>Very easy                                                                                                                                                                                                          | 0-12.5<br>12.6-37.5<br>37.6-62.4<br>62.5-87.4<br>87.5-100 | Sliding scale | Prim*;<br>Sec; FE | 2020; 2021               |
|      |            | <b>Have you ever tried to ask for support for a mental health problem from the following:</b>                                         |                                                                                                                                                                                                                                                                                              |                                                           |               |                   |                          |
|      |            | <b>Parent, step-parent or carer</b><br><b>Regarding this support, are you</b>                                                         | Currently being offered support<br>Previously been offered support<br>Not been offered support/been turned away                                                                                                                                                                              | Y<br>CURRENTSUPPORT<br>PREVSUPPORT<br>NOSUPPORT<br>T      | String        | Sec; Fe           | 2021                     |

Note: A \* in the Matched or Year Included columns indicates that the Question or Label column contain differences in the \* indicated year or survey version

## OxWell 2021 Secondary

|  |                                                                              |                                                                                                                                                                                             |                                                                              |               |         |      |
|--|------------------------------------------------------------------------------|---------------------------------------------------------------------------------------------------------------------------------------------------------------------------------------------|------------------------------------------------------------------------------|---------------|---------|------|
|  | <b>Regarding this support, was it helpful?</b>                               | <i>Changed mind before getting the support</i><br><i>Not helpful at all</i><br><i>Not helpful enough</i><br><i>Just about helpful enough</i><br><i>Quite helpful</i><br><i>Very helpful</i> | CHANGEDMI<br>ND<br>0-12.5<br>12.6-37.5<br>37.6-62.4<br>62.5-87.4<br>87.5-100 | Sliding scale | Sec; Fe | 2021 |
|  | <b>Brother or sister</b><br><b>Regarding this support, are you</b>           | <i>Currently being offered support</i><br><i>Previously been offered support</i><br><i>Not been offered support/been turned away</i>                                                        | Y<br>CURRENTS<br>UPPORT<br>PREVSUPP<br>ORT<br>NOSUPPOR<br>T                  | String        | Sec; Fe | 2021 |
|  | <b>Regarding this support, was it helpful?</b>                               | <i>Changed mind before getting the support</i><br><i>Not helpful at all</i><br><i>Not helpful enough</i><br><i>Just about helpful enough</i><br><i>Quite helpful</i><br><i>Very helpful</i> | CHANGEDMI<br>ND<br>0-12.5<br>12.6-37.5<br>37.6-62.4<br>62.5-87.4<br>87.5-100 | Sliding scale | Sec; Fe | 2021 |
|  | <b>Someone else in your family</b><br><b>Regarding this support, are you</b> | <i>Currently being offered support</i><br><i>Previously been offered support</i><br><i>Not been offered support/been turned away</i>                                                        | Y<br>CURRENTS<br>UPPORT<br>PREVSUPP<br>ORT<br>NOSUPPOR<br>T                  | String        | Sec; Fe | 2021 |
|  | <b>Regarding this support, was it helpful?</b>                               | <i>Changed mind before getting the support</i><br><i>Not helpful at all</i><br><i>Not helpful enough</i><br><i>Just about helpful enough</i><br><i>Quite helpful</i><br><i>Very helpful</i> | CHANGEDMI<br>ND<br>0-12.5<br>12.6-37.5<br>37.6-62.4<br>62.5-87.4<br>87.5-100 | Sliding scale | Sec; Fe | 2021 |
|  | <b>Friend(s)</b><br><b>Regarding this support, are you</b>                   | <i>Currently being offered support</i><br><i>Previously been offered support</i>                                                                                                            | Y<br>CURRENTS<br>UPPORT<br>PREVSUPP<br>ORT                                   | String        | Sec; Fe | 2021 |

Note: A \* in the *Matched* or *Year Included* columns indicates that the *Question* or *Label* column contain differences in the \* indicated year or survey version



## OxWell 2021 Secondary

|  |                                                                                                      |                                                                                                                                                                                                                                                                                                                                     |                                                                                                                             |               |         |      |
|--|------------------------------------------------------------------------------------------------------|-------------------------------------------------------------------------------------------------------------------------------------------------------------------------------------------------------------------------------------------------------------------------------------------------------------------------------------|-----------------------------------------------------------------------------------------------------------------------------|---------------|---------|------|
|  | <b>Regarding this support, was it helpful?</b>                                                       | <i>Not been offered support/been turned away</i><br><i>Changed mind before getting the support</i><br><i>Not helpful at all</i><br><i>Not helpful enough</i><br><i>Just about helpful enough</i><br><i>Quite helpful</i><br><i>Very helpful</i>                                                                                     | NOSUPPORT<br>CHANGEDMIND<br>0-12.5<br>12.6-37.5<br>37.6-62.4<br>62.5-87.4<br>87.5-100                                       | Sliding scale | Sec; Fe | 2021 |
|  | <b>GP (family doctor)</b><br><b>Regarding this support, are you</b>                                  | <i>Currently being offered support</i><br><i>Previously been offered support</i><br><i>Not been offered support/been turned away</i><br><i>Changed mind before getting the support</i><br><i>Not helpful at all</i><br><i>Not helpful enough</i><br><i>Just about helpful enough</i><br><i>Quite helpful</i><br><i>Very helpful</i> | Y<br>CURRENTSUPPORT<br>PREVSUPPORT<br>NOSUPPORT<br>CHANGEDMIND<br>0-12.5<br>12.6-37.5<br>37.6-62.4<br>62.5-87.4<br>87.5-100 | String        | Sec; Fe | 2021 |
|  | <b>Regarding this support, was it helpful?</b>                                                       | <i>Not helpful at all</i><br><i>Not helpful enough</i><br><i>Just about helpful enough</i><br><i>Quite helpful</i><br><i>Very helpful</i>                                                                                                                                                                                           | 0-12.5<br>12.6-37.5<br>37.6-62.4<br>62.5-87.4<br>87.5-100                                                                   | Sliding scale | Sec; Fe | 2021 |
|  | <b>Social Worker</b><br><b>Regarding this support, are you</b>                                       | <i>Currently being offered support</i><br><i>Previously been offered support</i><br><i>Not been offered support/been turned away</i><br><i>Changed mind before getting the support</i><br><i>Not helpful at all</i><br><i>Not helpful enough</i><br><i>Just about helpful enough</i><br><i>Quite helpful</i><br><i>Very helpful</i> | Y<br>CURRENTSUPPORT<br>PREVSUPPORT<br>NOSUPPORT<br>CHANGEDMIND<br>0-12.5<br>12.6-37.5<br>37.6-62.4<br>62.5-87.4<br>87.5-100 | String        | Sec; Fe | 2021 |
|  | <b>Regarding this support, was it helpful?</b>                                                       | <i>Not helpful at all</i><br><i>Not helpful enough</i><br><i>Just about helpful enough</i><br><i>Quite helpful</i><br><i>Very helpful</i>                                                                                                                                                                                           | 0-12.5<br>12.6-37.5<br>37.6-62.4<br>62.5-87.4<br>87.5-100                                                                   | Sliding scale | Sec; Fe | 2021 |
|  | <b>School Nurse/Counsellor/Educational Mental health practitioner/other pastoral staff at school</b> |                                                                                                                                                                                                                                                                                                                                     | Y                                                                                                                           |               |         |      |

Note: A \* in the *Matched* or *Year Included* columns indicates that the *Question* or *Label* column contain differences in the \* indicated year or survey version

## OxWell 2021 Secondary

|  |                                                |                                                  |                          |               |         |      |
|--|------------------------------------------------|--------------------------------------------------|--------------------------|---------------|---------|------|
|  | <b>Regarding this support, are you</b>         | <i>Currently being offered support</i>           | CURRENTS                 | String        | Sec; Fe | 2021 |
|  |                                                | <i>Previously been offered support</i>           | UPPORT                   |               |         |      |
|  |                                                | <i>Not been offered support/been turned away</i> | PREVSUPPORT<br>NOSUPPORT |               |         |      |
|  | <b>Regarding this support, was it helpful?</b> | <i>Changed mind before getting the support</i>   | CHANGEDMIND              |               |         |      |
|  |                                                | <i>Not helpful at all</i>                        | 0-12.5                   | Sliding scale | Sec; Fe | 2021 |
|  |                                                | <i>Not helpful enough</i>                        | 12.6-37.5                |               |         |      |
|  |                                                | <i>Just about helpful enough</i>                 | 37.6-62.4                |               |         |      |
|  |                                                | <i>Quite helpful</i>                             | 62.5-87.4                |               |         |      |
|  |                                                | <i>Very helpful</i>                              | 87.5-100                 |               |         |      |
|  | <b>Another adult at school</b>                 |                                                  | Y                        |               |         |      |
|  | <b>Regarding this support, are you</b>         | <i>Currently being offered support</i>           | CURRENTS                 | String        | Sec; Fe | 2021 |
|  |                                                | <i>Previously been offered support</i>           | UPPORT                   |               |         |      |
|  |                                                | <i>Not been offered support/been turned away</i> | PREVSUPPORT<br>NOSUPPORT |               |         |      |
|  | <b>Regarding this support, was it helpful?</b> | <i>Changed mind before getting the support</i>   | CHANGEDMIND              |               |         |      |
|  |                                                | <i>Not helpful at all</i>                        | 0-12.5                   | Sliding scale | Sec; Fe | 2021 |
|  |                                                | <i>Not helpful enough</i>                        | 12.6-37.5                |               |         |      |
|  |                                                | <i>Just about helpful enough</i>                 | 37.6-62.4                |               |         |      |
|  |                                                | <i>Quite helpful</i>                             | 62.5-87.4                |               |         |      |
|  |                                                | <i>Very helpful</i>                              | 87.5-100                 |               |         |      |
|  | <b>A peer mentor at school</b>                 |                                                  | Y                        |               |         |      |
|  | <b>Regarding this support, are you</b>         | <i>Currently being offered support</i>           | CURRENTS                 | String        | Sec; Fe | 2021 |
|  |                                                | <i>Previously been offered support</i>           | UPPORT                   |               |         |      |
|  |                                                | <i>Not been offered support/been turned away</i> | PREVSUPPORT<br>NOSUPPORT |               |         |      |
|  | <b>Regarding this support, was it helpful?</b> | <i>Changed mind before getting the support</i>   | CHANGEDMIND              |               |         |      |
|  |                                                | <i>Not helpful at all</i>                        | 0-12.5                   | Sliding scale | Sec; Fe | 2021 |
|  |                                                | <i>Not helpful enough</i>                        | 12.6-37.5                |               |         |      |
|  |                                                | <i>Just about helpful enough</i>                 | 37.6-62.4                |               |         |      |
|  |                                                | <i>Quite helpful</i>                             | 62.5-87.4                |               |         |      |
|  |                                                | <i>Very helpful</i>                              | 87.5-100                 |               |         |      |

Note: A \* in the *Matched* or *Year Included* columns indicates that the *Question* or *Label* column contain differences in the \* indicated year or survey version

## OxWell 2021 Secondary

|  |                                                                                    |                                                  |                |               |         |      |
|--|------------------------------------------------------------------------------------|--------------------------------------------------|----------------|---------------|---------|------|
|  | <b>CAMHS (NHS Child and adolescent mental health services)</b>                     |                                                  | Y              |               |         |      |
|  | <b>Regarding this support, are you</b>                                             | <i>Currently being offered support</i>           | CURRENTSUPPORT | String        | Sec; Fe | 2021 |
|  |                                                                                    | <i>Previously been offered support</i>           | PREVSUPPORT    |               |         |      |
|  |                                                                                    | <i>Not been offered support/been turned away</i> | NOSUPPORT      |               |         |      |
|  | <b>Regarding this support, was it helpful?</b>                                     | <i>Changed mind before getting the support</i>   | CHANGEDMIND    | Sliding scale | Sec; Fe | 2021 |
|  |                                                                                    | <i>Not helpful at all</i>                        | 0-12.5         |               |         |      |
|  |                                                                                    | <i>Not helpful enough</i>                        | 12.6-37.5      |               |         |      |
|  |                                                                                    | <i>Just about helpful enough</i>                 | 37.6-62.4      |               |         |      |
|  |                                                                                    | <i>Quite helpful</i>                             | 62.5-87.4      |               |         |      |
|  |                                                                                    | <i>Very helpful</i>                              | 87.5-100       |               |         |      |
|  | <b>Support service given by charity</b>                                            |                                                  | Y              |               |         |      |
|  | <b>Regarding this support, are you</b>                                             | <i>Currently being offered support</i>           | CURRENTSUPPORT | String        | Sec; Fe | 2021 |
|  |                                                                                    | <i>Previously been offered support</i>           | PREVSUPPORT    |               |         |      |
|  |                                                                                    | <i>Not been offered support/been turned away</i> | NOSUPPORT      |               |         |      |
|  | <b>Regarding this support, was it helpful?</b>                                     | <i>Changed mind before getting the support</i>   | CHANGEDMIND    | Sliding scale | Sec; Fe | 2021 |
|  |                                                                                    | <i>Not helpful at all</i>                        | 0-12.5         |               |         |      |
|  |                                                                                    | <i>Not helpful enough</i>                        | 12.6-37.5      |               |         |      |
|  |                                                                                    | <i>Just about helpful enough</i>                 | 37.6-62.4      |               |         |      |
|  |                                                                                    | <i>Quite helpful</i>                             | 62.5-87.4      |               |         |      |
|  |                                                                                    | <i>Very helpful</i>                              | 87.5-100       |               |         |      |
|  | <b>An adult outside of school (at a sport club, another parent, family friend)</b> |                                                  | Y              |               |         |      |
|  | <b>Regarding this support, are you</b>                                             | <i>Currently being offered support</i>           | CURRENTSUPPORT | String        | Sec; Fe | 2021 |
|  |                                                                                    | <i>Previously been offered support</i>           | PREVSUPPORT    |               |         |      |
|  |                                                                                    | <i>Not been offered support/been turned away</i> | NOSUPPORT      |               |         |      |
|  | <b>Regarding this support, was it helpful?</b>                                     | <i>Changed mind before getting the support</i>   | CHANGEDMIND    | Sliding scale | Sec; Fe | 2021 |
|  |                                                                                    | <i>Not helpful at all</i>                        | 0-12.5         |               |         |      |
|  |                                                                                    | <i>Not helpful enough</i>                        | 12.6-37.5      |               |         |      |
|  |                                                                                    | <i>Just about helpful enough</i>                 | 37.6-62.4      |               |         |      |

Note: A \* in the *Matched* or *Year Included* columns indicates that the *Question* or *Label* column contain differences in the \* indicated year or survey version

## OxWell 2021 Secondary

|  |                                                |                                                  |                |               |         |      |
|--|------------------------------------------------|--------------------------------------------------|----------------|---------------|---------|------|
|  |                                                | <i>Quite helpful</i>                             | 62.5-87.4      |               |         |      |
|  |                                                | <i>Very helpful</i>                              | 87.5-100       |               |         |      |
|  | <b>A telephone/text helpline</b>               |                                                  | Y              |               |         |      |
|  | <b>Regarding this support, are you</b>         | <i>Currently being offered support</i>           | CURRENTSUPPORT | String        | Sec; Fe | 2021 |
|  |                                                | <i>Previously been offered support</i>           | PREVSUPPORT    |               |         |      |
|  |                                                | <i>Not been offered support/been turned away</i> | NOSUPPORT      |               |         |      |
|  | <b>Regarding this support, was it helpful?</b> | <i>Changed mind before getting the support</i>   | CHANGEDMIND    |               |         |      |
|  |                                                | <i>Not helpful at all</i>                        | 0-12.5         | Sliding scale | Sec; Fe | 2021 |
|  |                                                | <i>Not helpful enough</i>                        | 12.6-37.5      |               |         |      |
|  |                                                | <i>Just about helpful enough</i>                 | 37.6-62.4      |               |         |      |
|  |                                                | <i>Quite helpful</i>                             | 62.5-87.4      |               |         |      |
|  |                                                | <i>Very helpful</i>                              | 87.5-100       |               |         |      |
|  | <b>Website or online forum</b>                 |                                                  | Y              |               |         |      |
|  | <b>Regarding this support, are you</b>         | <i>Currently being offered support</i>           | CURRENTSUPPORT | String        | Sec; Fe | 2021 |
|  |                                                | <i>Previously been offered support</i>           | PREVSUPPORT    |               |         |      |
|  |                                                | <i>Not been offered support/been turned away</i> | NOSUPPORT      |               |         |      |
|  | <b>Regarding this support, was it helpful?</b> | <i>Changed mind before getting the support</i>   | CHANGEDMIND    |               |         |      |
|  |                                                | <i>Not helpful at all</i>                        | 0-12.5         | Sliding scale | Sec; Fe | 2021 |
|  |                                                | <i>Not helpful enough</i>                        | 12.6-37.5      |               |         |      |
|  |                                                | <i>Just about helpful enough</i>                 | 37.6-62.4      |               |         |      |
|  |                                                | <i>Quite helpful</i>                             | 62.5-87.4      |               |         |      |
|  |                                                | <i>Very helpful</i>                              | 87.5-100       |               |         |      |
|  | <b>Other</b>                                   |                                                  | Y              | Free text box |         |      |
|  | <b>Please enter</b>                            |                                                  |                |               |         |      |
|  | <b>Regarding this support, are you</b>         | <i>Currently being offered support</i>           | CURRENTSUPPORT | String        | Sec; Fe | 2021 |
|  |                                                | <i>Previously been offered support</i>           | PREVSUPPORT    |               |         |      |
|  |                                                | <i>Not been offered support/been turned away</i> | NOSUPPORT      |               |         |      |
|  | <b>Regarding this support, was it helpful?</b> | <i>Changed mind before getting the support</i>   | CHANGEDMIND    |               |         |      |
|  |                                                | <i>Not helpful at all</i>                        | 0-12.5         | Sliding scale | Sec; Fe | 2021 |

Note: A \* in the *Matched* or *Year Included* columns indicates that the *Question* or *Label* column contain differences in the \* indicated year or survey version

## OxWell 2021 Secondary

|  |                                                                                                                        |                                                                                                     |           |   |          |                            |
|--|------------------------------------------------------------------------------------------------------------------------|-----------------------------------------------------------------------------------------------------|-----------|---|----------|----------------------------|
|  |                                                                                                                        | <i>Not helpful enough</i>                                                                           | 12.6-37.5 |   |          |                            |
|  |                                                                                                                        | <i>Just about helpful enough</i>                                                                    | 37.6-62.4 |   |          |                            |
|  |                                                                                                                        | <i>Quite helpful</i>                                                                                | 62.5-87.4 |   |          |                            |
|  |                                                                                                                        | <i>Very helpful</i>                                                                                 | 87.5-100  |   |          |                            |
|  | <b>None of these</b>                                                                                                   |                                                                                                     |           | Y |          |                            |
|  | <b><i>Is there any support you would have liked to have accessed, or people you wish you could have talked to?</i></b> |                                                                                                     |           |   | Tick box | Sec; FE 2021               |
|  |                                                                                                                        | <i>Parent, step-parent or carer</i>                                                                 | Y         |   |          |                            |
|  |                                                                                                                        | <i>Brother or sister</i>                                                                            | Y         |   |          |                            |
|  |                                                                                                                        | <i>Someone else in your family</i>                                                                  | Y         |   |          |                            |
|  |                                                                                                                        | <i>Friend(s)</i>                                                                                    | Y         |   |          |                            |
|  |                                                                                                                        | <i>GP (family doctor)</i>                                                                           | Y         |   |          |                            |
|  |                                                                                                                        | <i>Social Worker</i>                                                                                | Y         |   |          |                            |
|  |                                                                                                                        | <i>School</i>                                                                                       | Y         |   |          |                            |
|  |                                                                                                                        | <i>Nurse/Counsellor/Educational Mental health practitioner/SENCO/other pastoral staff at school</i> | Y         |   |          |                            |
|  |                                                                                                                        | <i>A peer mentor at school</i>                                                                      | Y         |   |          |                            |
|  |                                                                                                                        | <i>CAMHS (NHS Child and adolescent mental health services)</i>                                      | Y         |   |          |                            |
|  |                                                                                                                        | <i>Support Service given by a charity</i>                                                           | Y         |   |          |                            |
|  |                                                                                                                        | <i>An adult outside of school (at a sport club, another parent, family friend)</i>                  | Y         |   |          |                            |
|  |                                                                                                                        | <i>A telephone/text helpline</i>                                                                    | Y         |   |          |                            |
|  |                                                                                                                        | <i>Website or online forum</i>                                                                      | Y         |   |          |                            |
|  |                                                                                                                        | <i>Other</i>                                                                                        | Y         |   |          |                            |
|  |                                                                                                                        | <i>Please enter:</i>                                                                                | Y         |   |          |                            |
|  |                                                                                                                        | <i>None of these</i>                                                                                | Y         |   |          |                            |
|  | <b><i>Is there anything that prevented you from accessing support?</i></b>                                             |                                                                                                     |           |   | Tick box | Prim*; Sec; FE 2020; 2021* |
|  |                                                                                                                        | <i>Didn't know who to ask</i>                                                                       | Y         |   |          |                            |
|  |                                                                                                                        | <i>Didn't like the person providing support</i>                                                     | Y         |   |          |                            |
|  |                                                                                                                        | <i>Didn't feel safe to share</i>                                                                    | Y         |   |          |                            |
|  |                                                                                                                        | <i>Worried I might not get taken seriously</i>                                                      | Y         |   |          |                            |

Note: A \* in the *Matched* or *Year Included* columns indicates that the *Question* or *Label* column contain differences in the \* indicated year or survey version

## OxWell 2021 Secondary

|  |  |                                                                 |   |               |
|--|--|-----------------------------------------------------------------|---|---------------|
|  |  | <i>Didn't like to talk to strangers</i>                         | Y |               |
|  |  | <i>Didn't want parents to know</i>                              | Y |               |
|  |  | <i>Didn't want other young people to know</i>                   | Y |               |
|  |  | <i>Didn't want teachers or staff in school to know</i>          | Y |               |
|  |  | <i>Worried I would not be seen as a priority by the service</i> | Y |               |
|  |  | <i>Might have to wait too long to get help</i>                  | Y |               |
|  |  | <i>Too much hassle to get the help</i>                          | Y |               |
|  |  | <i>Did not want help</i>                                        | Y |               |
|  |  | <i>Didn't want to burden anyone else</i>                        | Y |               |
|  |  | <i>Didn't want the stigma</i>                                   | Y |               |
|  |  | <i>Scared/worried about what people might say</i>               | Y |               |
|  |  | <i>Other</i>                                                    | Y |               |
|  |  | <i>Please enter:</i>                                            |   | Free text box |

Note: A \* in the *Matched* or *Year Included* columns indicates that the *Question* or *Label* column contain differences in the \* indicated year or survey version

OxWell 2021 Secondary  
**RELATIONSHIPS**

| CODE | Contingent | Question                                                                               | Label                              | Value     | Type   | Matched          | Year Included |
|------|------------|----------------------------------------------------------------------------------------|------------------------------------|-----------|--------|------------------|---------------|
|      |            | <b>How easy do you find it to make and keep friends?</b>                               | <i>Very difficult</i>              | 0-12.5    | String | Prim; Sec;<br>FE | 2019; 2021    |
|      |            |                                                                                        | <i>Quite difficult</i>             | 12.6-37.5 |        |                  |               |
|      |            |                                                                                        | <i>Sometimes difficult</i>         | 37.6-62.4 |        |                  |               |
|      |            |                                                                                        | <i>Quite easy</i>                  | 62.5-87.4 |        |                  |               |
|      |            |                                                                                        | <i>Very easy</i>                   | 87.5-100  |        |                  |               |
|      |            | <b>How well do you get along with other people in your household?</b>                  | <i>Very well or well</i>           | WELL      | String | Prim; Sec;<br>FE | 2020; 2021    |
|      |            |                                                                                        | <i>Most of the time well</i>       | WELLMOST  |        |                  |               |
|      |            |                                                                                        | <i>Not well or not at all well</i> | NOTWELL   |        |                  |               |
|      |            | <b>How well do you get along with your friends?</b>                                    | <i>Very well or well</i>           | WELL      | String | Prim; Sec;<br>FE | 2020; 2021    |
|      |            |                                                                                        | <i>Most of the time well</i>       | WELLMOST  |        |                  |               |
|      |            |                                                                                        | <i>Not well or not at all well</i> | NOTWELL   |        |                  |               |
|      |            | <b>How often do you feel that you have no one to talk to (in person/online/phone)?</b> | <i>Hardly ever or never</i>        | NEVER     | String | Prim; Sec;<br>FE | 2020; 2021    |
|      |            |                                                                                        | <i>Some of the time</i>            | SOMETIMES |        |                  |               |
|      |            |                                                                                        | <i>Often</i>                       | OFTEN     |        |                  |               |
|      |            | <b>How often do you feel left out?</b>                                                 | <i>Hardly ever or never</i>        | NEVER     | String | Prim; Sec;<br>FE | 2020; 2021    |
|      |            |                                                                                        | <i>Some of the time</i>            | SOMETIMES |        |                  |               |
|      |            |                                                                                        | <i>Often</i>                       | OFTEN     |        |                  |               |
|      |            | <b>How often do you feel alone?</b>                                                    | <i>Hardly ever or never</i>        | NEVER     | String | Prim; Sec;<br>FE | 2021          |
|      |            |                                                                                        | <i>Some of the time</i>            | SOMETIMES |        |                  |               |
|      |            |                                                                                        | <i>Often</i>                       | OFTEN     |        |                  |               |
|      |            | <b>How often do you feel lonely?</b>                                                   | <i>Hardly ever or never</i>        | NEVER     | String | Prim; Sec;<br>FE | 2020; 2021    |
|      |            |                                                                                        | <i>Some of the time</i>            | SOMETIMES |        |                  |               |
|      |            |                                                                                        | <i>Often</i>                       | OFTEN     |        |                  |               |

Note: A \* in the *Matched* or *Year Included* columns indicates that the *Question* or *Label* column contain differences in the \* indicated year or survey version

## OxWell 2021 Secondary

**SEXUAL HEALTH**

| CODE | Contingent | Question                                                                                                                                                | Label                   | Value       | Type     | Matched | Year Included |
|------|------------|---------------------------------------------------------------------------------------------------------------------------------------------------------|-------------------------|-------------|----------|---------|---------------|
|      |            | <b>Do you wish to opt out of the RSE questions?</b>                                                                                                     | Yes<br>No               | Y<br>N      | String   | Sec; FE | 2019; 2021    |
|      |            | <b>Would you know where to get a condom if you needed one?</b>                                                                                          | Yes<br>No<br>Don't Know | Y<br>N<br>R | String   | Sec; FE | 2019; 2021*   |
|      |            | <b>Do you know how and where to access contraception and sexual health advice?</b>                                                                      | Yes<br>No               | Y<br>N      | String   | Sec; FE | 2019; 2021*   |
|      |            | <b>If you needed help and advice about contraception/emergency contraception/not getting pregnant or preventing STI's who would you go to for help?</b> |                         |             | Tick box | Sec; FE | 2019; 2021*   |
|      |            | <b>Parent. step-parent or carer</b>                                                                                                                     |                         | Y           |          |         |               |
|      |            | <b>Someone else in your family</b>                                                                                                                      |                         | Y           |          |         |               |
|      |            | <b>Friend(s)</b>                                                                                                                                        |                         | Y           |          |         |               |
|      |            | <b>A teacher or other adult at your school</b>                                                                                                          |                         | Y           |          |         |               |
|      |            | <b>A school nurse</b>                                                                                                                                   |                         | Y           |          |         |               |
|      |            | <b>A doctor, nurse (outside school), psychologist</b>                                                                                                   |                         | Y           |          |         |               |
|      |            | <b>A counsellor, youth worker or social worker</b>                                                                                                      |                         | Y           |          |         |               |
|      |            | <b>Internet advice sites, forums, chatrooms etc</b>                                                                                                     |                         | Y           |          |         |               |
|      |            | <b>No-one</b>                                                                                                                                           |                         | Y           |          |         |               |

Note: A \* in the Matched or Year Included columns indicates that the Question or Label column contain differences in the \* indicated year or survey version



## OxWell 2021 Secondary

**RESEARCH**

| CODE | Contingent                | Question                                                                                                                                                                                     | Label             | Value  | Type          | Matched           | Year Included         |
|------|---------------------------|----------------------------------------------------------------------------------------------------------------------------------------------------------------------------------------------|-------------------|--------|---------------|-------------------|-----------------------|
|      |                           | <b><i>If your answers to this survey could be linked like this to other information on you, would you still take part</i></b>                                                                | Yes               | Y      | String        | Prim*;<br>Sec; FE | 2021                  |
|      | No                        |                                                                                                                                                                                              | N                 |        |               |                   |                       |
|      | Maybe                     |                                                                                                                                                                                              | M                 |        |               |                   |                       |
|      | <i>I don't understand</i> |                                                                                                                                                                                              | D                 |        |               |                   |                       |
|      |                           | <b><i>Did you also complete this survey last year at school?</i></b>                                                                                                                         | Yes               | Y      | String        | Prim; Sec;<br>FE  | 2020; 2021*           |
|      | No                        |                                                                                                                                                                                              | N                 |        |               |                   |                       |
|      | <i>I can't remember</i>   |                                                                                                                                                                                              | NOMEMORY          |        |               |                   |                       |
|      |                           | <b><i>If your answers to this survey could be linked like this to other information on you, would you like to be able to compare your own answers to the average in your year group?</i></b> | <i>Not at all</i> | 0-12.5 | Sliding scale | Prim*;<br>Sec; FE | 2019*; 2020;<br>2021* |
|      | <i>Not much</i>           |                                                                                                                                                                                              | 12.6-37.5         |        |               |                   |                       |
|      | <i>Some</i>               |                                                                                                                                                                                              | 37.6-62.4         |        |               |                   |                       |
|      | <i>Quite a lot</i>        |                                                                                                                                                                                              | 62.5-87.4         |        |               |                   |                       |
|      | <i>A great deal</i>       |                                                                                                                                                                                              | 87.5-100          |        |               |                   |                       |
|      |                           | <b><i>If your answers to this survey could be linked to other school information on you, would you have answered any of questions in this survey differently?</i></b>                        | <i>Not at all</i> | 0-12.5 | Sliding scale | Prim*;<br>Sec; FE | 2019*; 2020;<br>2021* |
|      | <i>Not much</i>           |                                                                                                                                                                                              | 12.6-37.5         |        |               |                   |                       |
|      | <i>Some</i>               |                                                                                                                                                                                              | 37.6-62.4         |        |               |                   |                       |
|      | <i>Quite a lot</i>        |                                                                                                                                                                                              | 62.5-87.4         |        |               |                   |                       |
|      | <i>A great deal</i>       |                                                                                                                                                                                              | 87.5-100          |        |               |                   |                       |

Note: A \* in the *Matched* or *Year Included* columns indicates that the *Question* or *Label* column contain differences in the \* indicated year or survey version

## OxWell 2021 Secondary

**PARANOIA**

| CODE | Contingent | Question                                                                  | Label                   | Value          | Type   | Matched | Year Included |
|------|------------|---------------------------------------------------------------------------|-------------------------|----------------|--------|---------|---------------|
|      |            | <b><i>How often have you had these thoughts over the last 2 weeks</i></b> |                         |                |        |         |               |
|      |            | <b><i>People at school are trying to make me feel unwanted</i></b>        | <i>Never</i>            | NEVER          | String | Sec; FE | 2021          |
|      |            |                                                                           | <i>Once</i>             | ONCE           |        |         |               |
|      |            |                                                                           | <i>Couple of times</i>  | TWICE          |        |         |               |
|      |            |                                                                           | <i>Few times a week</i> | FEWTIMES<br>WK |        |         |               |
|      |            |                                                                           | <i>Every day</i>        | EVERYDAY       |        |         |               |
|      |            |                                                                           | <i>All the time</i>     | CONSTANT       |        |         |               |
|      |            | <b><i>I am sure people are gossiping about me on social media</i></b>     | <i>Never</i>            | NEVER          | String | Sec; FE | 2021          |
|      |            |                                                                           | <i>Once</i>             | ONCE           |        |         |               |
|      |            |                                                                           | <i>Couple of times</i>  | TWICE          |        |         |               |
|      |            |                                                                           | <i>Few times a week</i> | FEWTIMES<br>WK |        |         |               |
|      |            |                                                                           | <i>Every day</i>        | EVERYDAY       |        |         |               |
|      |            |                                                                           | <i>All the time</i>     | CONSTANT       |        |         |               |
|      |            | <b><i>I am being pushed out of conversations on purpose</i></b>           | <i>Never</i>            | NEVER          | String | Sec; FE | 2021          |
|      |            |                                                                           | <i>Once</i>             | ONCE           |        |         |               |
|      |            |                                                                           | <i>Couple of times</i>  | TWICE          |        |         |               |
|      |            |                                                                           | <i>Few times a week</i> | FEWTIMES<br>WK |        |         |               |
|      |            |                                                                           | <i>Every day</i>        | EVERYDAY       |        |         |               |
|      |            |                                                                           | <i>All the time</i>     | CONSTANT       |        |         |               |
|      |            | <b><i>My friends or partner are ignoring my messages to upset me</i></b>  | <i>Never</i>            | NEVER          | String | Sec; FE | 2021          |
|      |            |                                                                           | <i>Once</i>             | ONCE           |        |         |               |
|      |            |                                                                           | <i>Couple of times</i>  | TWICE          |        |         |               |
|      |            |                                                                           | <i>Few times a week</i> | FEWTIMES<br>WK |        |         |               |
|      |            |                                                                           | <i>Every day</i>        | EVERYDAY       |        |         |               |
|      |            |                                                                           | <i>All the time</i>     | CONSTANT       |        |         |               |
|      |            | <b><i>People are trying to embarrass me in class on purpose</i></b>       | <i>Never</i>            | NEVER          | String | Sec; FE | 2021          |
|      |            |                                                                           | <i>Once</i>             | ONCE           |        |         |               |
|      |            |                                                                           | <i>Couple of times</i>  | TWICE          |        |         |               |
|      |            |                                                                           | <i>Few times a week</i> | FEWTIMES<br>WK |        |         |               |
|      |            |                                                                           | <i>Every day</i>        | EVERYDAY       |        |         |               |
|      |            |                                                                           | <i>All the time</i>     | CONSTANT       |        |         |               |

Note: A \* in the *Matched* or *Year Included* columns indicates that the *Question* or *Label* column contain differences in the \* indicated year or survey version

## OxWell 2021 Secondary

|  |                                                           |                                                                                   |                                                                  |                  |                    |              |
|--|-----------------------------------------------------------|-----------------------------------------------------------------------------------|------------------------------------------------------------------|------------------|--------------------|--------------|
|  | <b>People are making sly comments to upset me</b>         | Never<br>Once<br>Couple of times<br>Few times a week<br>Every day<br>All the time | NEVER<br>ONCE<br>TWICE<br>FEWTIMES<br>WK<br>EVERYDAY<br>CONSTANT | String           | Sec; FE            | 2021         |
|  | <b>I think people are lying to me on purpose</b>          | Never<br>Once<br>Couple of times<br>Few times a week<br>Every day<br>All the time | NEVER<br>ONCE<br>TWICE<br>FEWTIMES<br>WK<br>EVERYDAY<br>CONSTANT | String           | Sec; FE            | 2021         |
|  | <b>People say things under their breath to wind me up</b> | Never<br>Once<br>Couple of times<br>Few times a week<br>Every day<br>All the time | NEVER<br>ONCE<br>TWICE<br>FEWTIMES<br>WK<br>EVERYDAY<br>CONSTANT | String           | Sec; FE            | 2021         |
|  | <b>Nasty tricks are being played on me</b>                | Never<br>Once<br>Couple of times<br>Few times a week<br>Every day<br>All the time | NEVER<br>ONCE<br>TWICE<br>FEWTIMES<br>WK<br>EVERYDAY<br>CONSTANT | String<br>String | Sec; FE<br>Sec; FE | 2021<br>2021 |
|  | <b>People are trying to confuse me on purpose</b>         | Never<br>Once<br>Couple of times<br>Few times a week<br>Every day<br>All the time | NEVER<br>ONCE<br>TWICE<br>FEWTIMES<br>WK<br>EVERYDAY<br>CONSTANT | String           | Sec; FE            | 2021         |
|  | <b>Groups of people are planning against me</b>           | Never<br>Once<br>Couple of times<br>Few times a week                              | NEVER<br>ONCE<br>TWICE<br>FEWTIMES<br>WK                         | String           | Sec; FE            | 2021         |

Note: A \* in the *Matched* or *Year Included* columns indicates that the *Question* or *Label* column contain differences in the \* indicated year or survey version

## OxWell 2021 Secondary

|  |                                                                         |                                                                                                                             |                                                                  |        |         |      |
|--|-------------------------------------------------------------------------|-----------------------------------------------------------------------------------------------------------------------------|------------------------------------------------------------------|--------|---------|------|
|  |                                                                         | <i>Every day</i><br><i>All the time</i>                                                                                     | EVERYDAY<br>CONSTANT                                             |        |         |      |
|  | <b>People are collecting my information or photos to use against me</b> | <i>Never</i><br><i>Once</i><br><i>Couple of times</i><br><i>Few times a week</i><br><i>Every day</i><br><i>All the time</i> | NEVER<br>ONCE<br>TWICE<br>FEWTIMES<br>WK<br>EVERYDAY<br>CONSTANT | String | Sec; FE | 2021 |
|  | <b>I'm sure people are seeking revenge on me</b>                        | <i>Never</i><br><i>Once</i><br><i>Couple of times</i><br><i>Few times a week</i><br><i>Every day</i><br><i>All the time</i> | NEVER<br>ONCE<br>TWICE<br>FEWTIMES<br>WK<br>EVERYDAY<br>CONSTANT | String | Sec; FE | 2021 |
|  | <b>I feel like I am being followed or stalked</b>                       | <i>Never</i><br><i>Once</i><br><i>Couple of times</i><br><i>Few times a week</i><br><i>Every day</i><br><i>All the time</i> | NEVER<br>ONCE<br>TWICE<br>FEWTIMES<br>WK<br>EVERYDAY<br>CONSTANT | String | Sec; FE | 2021 |
|  | <b>I am scared of what strangers will do to me</b>                      | <i>Never</i><br><i>Once</i><br><i>Couple of times</i><br><i>Few times a week</i><br><i>Every day</i><br><i>All the time</i> | NEVER<br>ONCE<br>TWICE<br>FEWTIMES<br>WK<br>EVERYDAY<br>CONSTANT | String | Sec; FE | 2021 |
|  | <b>People will try to kidnap me</b>                                     | <i>Never</i><br><i>Once</i><br><i>Couple of times</i><br><i>Few times a week</i><br><i>Every day</i><br><i>All the time</i> | NEVER<br>ONCE<br>TWICE<br>FEWTIMES<br>WK<br>EVERYDAY<br>CONSTANT | String | Sec; FE | 2021 |
|  | <b>I could be attacked at any time</b>                                  | <i>Never</i><br><i>Once</i>                                                                                                 | NEVER<br>ONCE                                                    | String | Sec; FE | 2021 |

Note: A \* in the *Matched* or *Year Included* columns indicates that the *Question* or *Label* column contain differences in the \* indicated year or survey version

## OxWell 2021 Secondary

|  |                                                           |                         |                |        |         |      |
|--|-----------------------------------------------------------|-------------------------|----------------|--------|---------|------|
|  |                                                           | <i>Couple of times</i>  | TWICE          |        |         |      |
|  |                                                           | <i>Few times a week</i> | FEWTIMES<br>WK |        |         |      |
|  |                                                           | <i>Every day</i>        | EVERYDAY       |        |         |      |
|  |                                                           | <i>All the time</i>     | CONSTANT       |        |         |      |
|  | <b><i>I feel unsafe around people everywhere I go</i></b> | <i>Never</i>            | NEVER          | String | Sec; FE | 2021 |
|  |                                                           | <i>Once</i>             | ONCE           |        |         |      |
|  |                                                           | <i>Couple of times</i>  | TWICE          |        |         |      |
|  |                                                           | <i>Few times a week</i> | FEWTIMES<br>WK |        |         |      |
|  |                                                           | <i>Every day</i>        | EVERYDAY       |        |         |      |
|  |                                                           | <i>All the time</i>     | CONSTANT       |        |         |      |

Note: A \* in the *Matched* or *Year Included* columns indicates that the *Question* or *Label* column contain differences in the \* indicated year or survey version
